RESEARCH

# The genomic architecture of introgression among sibling species of bacteria

Maria Izabel A Cavassim<sup>1</sup>, Sara Moeskjær<sup>2</sup>, Camous Moslemi<sup>2</sup>, Bryden Fields<sup>3</sup>, Asger Bachmann<sup>1</sup>, Bjarni Vilhjálmsson<sup>1</sup>, Mikkel H Schierup<sup>1</sup>, J Peter W Young<sup>3\*</sup> and Stig U Andersen<sup>2\*</sup>

\*Correspondence: [sua@mbg.au.dk](mailto:sua@mbg.au.dk)  
and [peter.young@york.ac.uk](mailto:peter.young@york.ac.uk)

<sup>2</sup>Department of Molecular Biology  
and Genetics, Aarhus University,  
Aarhus, Denmark

<sup>3</sup>Department of Biology, University  
of York, York, United Kingdom  
Full list of author information is  
available at the end of the article

## Abstract

**Background:** Gene transfer between bacterial species is an important mechanism for adaptation. For example, sets of genes that confer the ability to form nitrogen-fixing root nodules on host plants have frequently moved between *Rhizobium* species. It is not clear, though, whether such transfer is exceptional, or if frequent inter-species introgression is typical. To address this, we sequenced the genomes of 196 isolates of the *Rhizobium leguminosarum* species complex obtained from root nodules of white clover (*Trifolium repens*).

**Results:** Core gene phylogeny placed the isolates into five distinct genospecies that show high intra-genospecies recombination rates and remarkably different demographic histories. Most gene phylogenies were largely concordant with the genospecies, indicating that recent gene transfer between genospecies was rare. In contrast, very similar symbiosis gene sequences were found in two or more genospecies, suggesting recent horizontal transfer. The replication and conjugative transfer genes of the plasmids carrying the symbiosis genes showed a similar pattern, implying that introgression occurred by conjugative plasmid transfer. The only other regions that showed strong phylogenetic discordance with the genospecies classification were two small chromosomal clusters, one neighbouring a conjugative transfer system. Phage-related sequences were observed in the genomes, but appeared to have very limited impact on introgression.

**Conclusions:** Introgression among these closely-related species has been very limited, confined to the symbiosis plasmids and a few chromosomal islands. Both introgress through conjugative transfer, but have been subject to different types of selective forces.

**Keywords:** Rhizobia; white clover; genome assembly; introgression; conjugation

## Background

1 The promiscuity of bacteria, and their ability to rapidly transfer DNA, has in the  
2 last years challenged microbiologists and geneticists seeking to integrate prokary-  
3 otes into standard models of speciation [1, 2, 3, 4]. The dynamic nature of acquisi-  
4 tion, loss and transfer of genes in these organisms goes beyond the recombinational  
5 process and vertical inheritance, forcing a redesign of the speciation models for  
6 prokaryotes [5, 6, 7].

7 In contrast to most eukaryotes, which have mutation and meiotic recombina-  
8 tion as the main adaptive drivers, bacterial species rapidly adapt through other  
9 types of genetic exchange: transformation (through the cell membrane), transduc-  
10 tion (through a vector), and conjugation (cell-to-cell contact) [8, 9]. These processes  
11 can move adaptive genes between distantly related species, creating regions of high  
12 genetic similarity.

13 When describing prokaryotic genomes, an important distinction must be made  
14 between core and accessory genomes. The core genome is the set of ubiquitous genes  
15 within a defined group, such as a species. These genes often include housekeeping  
16 genes and are generally found in the chromosome. In certain species, core genes are  
17 also found on chromids, which are large plasmids that have acquired chromosomal  
18 characteristics [10, 11]. The accessory genome is a pool of non-ubiquitous genes that  
19 can provide a bacterial strain with adaptive advantages, for instance with respect  
20 to host interaction, antibiotic resistance, or heavy metal resistance [12, 13, 14]. The  
21 accessory genome is mainly found in the accessory plasmids, but also in islands in  
22 the chromosome and chromids.

23 Genetic divergence among closely related species can arise by ecological and ge-  
24 netic processes. Ecologically distinct niches may select genotypes with different  
25 adaptations [15, 16, 17]. This model, known as the ecotype model, is frequently  
26 observed in nature. In sympatric populations of the aquatic bacterioplankton of the  
27 family *Vibrionaceae* for example, phylogenetic differentiation was observed to be  
28 initiated by a change in ecological niche [18, 19].

29 Another possible factor for the isolation of sibling species is recombinational in-  
30 compatibility [20, 16]. Multiple experimental studies of bacterial recombination have  
31 revealed that homologous recombination between prokaryotes may be restricted by  
32 sequence divergence between donor and recipient [21, 22], since sequence mismatches

33 interfere with the process of recombination [23]. The relationship between recombi-  
34 nation and sequence divergence produces a feedback loop on speciation: increased  
35 sexual isolation increases divergence, and genetic isolation prevents gene flow [24].

36 The intensity and the rate of homologous recombination during the process of  
37 prokaryotic genetic differentiation in prokaryotes is still unclear. While analyzing  
38 nucleotide sequences of *E. coli*, Visser and Rossez [25] observed that the spread  
39 of alleles through homologous recombination was restricted to small regions of the  
40 chromosome that carried advantageous information. These patterns could be ex-  
41 plained by periodic selection events (selective sweeps) in the genome.

42 Another study that compared *Vibrio* species from very different ecological back-  
43 grounds [26] also concluded that ecological differentiation among species was driven  
44 by gene-specific rather than genome-wide selective sweeps, followed by gradual  
45 emergence of barriers to gene flow. The species described in this study were  
46 still at an early stage of ecological differentiation, and therefore genetic similar-  
47 ity across species was still high enough that interspecies recombination had not  
48 been fully inhibited. There is also extensive literature documenting the sharing of  
49 symbiosis-related genes among distinct, and sometimes distant, species of rhizo-  
50 bia, the nitrogen-fixing root-nodule symbionts of legumes [27, 28, 29]. This occurs  
51 whether the genes are on plasmids [30, 31, 32, 33] or on conjugative chromosomal  
52 islands [34, 35].

53 These events demonstrate that gene introgression has occurred in symbiotic soil  
54 bacteria, but it is not known to what extent the symbiosis genes, which are under  
55 strong selection because of the interaction with the plant host (reviewed by [36]),  
56 reflect the general behaviour of accessory genes. To address this question and obtain  
57 a more general understanding of introgression characteristics and mechanisms, we  
58 assembled 196 *R. leguminosarum* genome sequences, which comprised five distinct  
59 genospecies, and carried out a comprehensive introgression analysis.

## 60 **Results**

### 61 Identification and characterization of five distinct genospecies

62 A collection of 196 draft genome assemblies of *Rhizobium leguminosarum* is pre-  
63 sented here. The strains were isolated from root nodules of white clover (*Trifolium*  
64 *repens*) in three different European countries and under two management regimes:

65 field trial sites in Denmark (DK), France (F), and the United Kingdom (UK), and  
66 organic fields in Denmark (DKO) (Additional file 1: Fig. S1 and S2, Additional file  
67 2: Table S1). The genomes of seven strains were sequenced using PacBio and fully  
68 assembled into chromosome and plasmids. All 196 strains were sequenced using Il-  
69 lumina, and the assemblies were optimized using the PacBio complete genomes as  
70 references in order to determine, as far as possible, the correct order and orientation  
71 of contigs (Fig. 4 and 5, Additional file 2: Table S2).

72 Pairwise comparisons of average nucleotide identity (ANI) based on 282 bacterial  
73 conserved genes ([37], Additional file 2: Table S4) revealed clear clusters of genetic  
74 similarity (Fig. 1b). These clusters corresponded to the five genospecies described by  
75 Kumar *et al.*, 2015 [38] genospecies (gs) A (33 strains), B (33), C (115), D (5) and E  
76 (10) (Additional file 1: Fig. S6). Overall, the pairwise similarity within a genospecies  
77 is above 96% and between genospecies below 96%. This is with the exception of  
78 genospecies D and E, which are on average 97% similar. Within each genospecies  
79 there are subclusters with varying degrees of distinctness, as shown in Fig. 1a.  
80 Analysis of types of genetic diversity (SNP, core ANI and gene presence/absence)  
81 showed similar patterns of structure, agreeing with the genospecies classification.

82 A total of 22,115 groups of orthologous genes were identified. Across all strains,  
83 a dichotomous pattern was observed: the majority of genes were either rare, shared  
84 by maximum 2 strains, or ubiquitous (Fig. 1d). Strains that were genetically close  
85 tended to have similar gene content, so that a pairwise comparison of gene sharing  
86 (Fig. 1c) resembles the core similarity matrices (Fig. 1a,b).

87 Even though these strains were collected from different countries (Denmark,  
88 United Kingdom and France) and soil managements (field trial sites and organic  
89 fields), the genetic diversity could not be fully explained by sample location (Fig.  
90 1a-c).

91 In a Principal Component Analysis (PCA) of SNP variation, 43.97% of the vari-  
92 ance was explained by the two first PCs, which separated the five genospecies (Fig.  
93 1e). PC3 and PC4 revealed the genetic substructure within gsC, but also separated  
94 gsE and gsD more clearly (Fig. 1f).

95 Accessory and core genomes

96 We also assessed the core and accessory gene content (Fig. 2). Almost 20% of the  
97 genes (4,204) were shared by all strains (core genes). We observed clusters of genes  
98 that were characteristic of a single genospecies but absent elsewhere, as well as  
99 clusters confined to groups of related isolates within a genospecies (Fig. 2a).

100 The abundance of genospecies-private genes and genospecies-accessory genes was  
101 estimated (Fig. 2b). Even though gsD and gsE are closely related, only a small num-  
102 ber of orthologous genes (116) are exclusive to them. The number of genospecies-  
103 private genes correlates with the genospecies sample size: for example, 4,969 genes  
104 are only found in gsC, the genospecies with the most members. Furthermore,  
105 pangenome analysis based on random addition of genomes showed that the gene  
106 pool of these populations can be considered as infinite, and that the inclusion of new  
107 genomes in the analysis would probably increase the accessory gene set indefinitely,  
108 but would not reduce the core genome significantly (Additional file 1: Fig. S7).

109 The nucleotide composition of the accessory genome was very distinct from that of  
110 the core genome (Fig. 2c). The median GC3 content (GC composition of third bases  
111 in codons) of the accessory genome (17,911 genes, 0.5704) was lower and significantly  
112 different from that of the core genome (4,204 genes, 0.6148). Differences in accessory  
113 and core GC3 content distribution were also observed between the chromosome and  
114 the two chromids (Additional file 1: Fig. S8, Additional file 2: Table S5).

115 Within-species variation

116 Variation within and between genospecies was investigated by characterizing nu-  
117 cleotide diversity, Site Frequency Spectra (SFS), Tajima's D, and decay of Linkage  
118 Disequilibrium (LD) with genomic distance (Fig. 3, see Methods).

119 The average nucleotide diversity differs by a factor of 5 among genospecies, and  
120 is higher for accessory than core genes and slightly higher for genes located on  
121 chromids compared to the chromosome (Fig. 3a). This is consistent with stronger  
122 purifying selection acting on essential genes.

123 The site frequency spectra are shown separately for synonymous and non-  
124 synonymous sites for genospecies A, B and C (Fig. 3b). Overall, the peaks of inter-  
125 mediate frequency SNPs reflect the population structure within each genospecies.  
126 For synonymous SNPs, the shape of the SFS differs among genospecies with

127 genospecies C having a larger proportion of rare variants and genospecies A hav-  
128 ing a large proportion of intermediate frequency variants. This suggests different  
129 population demography of the genospecies, with genospecies C showing a signal of  
130 population expansion and genospecies A of population decline. This is reflected in  
131 positive values of Tajima's D for genospecies A and negative values for genospecies  
132 C (Fig. 3c). Contrasting synonymous and non-synonymous SFS for each genospecies  
133 we find a relative excess of rare non-synonymous variants consistent with segrega-  
134 tion of non-synonymous variation under weak purifying selection.

135 We assessed the decay in intragenic linkage disequilibrium with distance using  
136 the  $r^2$  measure of LD ([39] see details in Methods). In all genospecies there is a  
137 rapid decay of LD within the first 1000 base pairs, suggesting a very high rate of  
138 recombination within genospecies. The less dramatic decay in genospecies B may  
139 either reflect a lower per generation recombination rate or a lower population size  
140 consistent with its low level of nucleotide diversity.

141 Full PacBio assemblies gave us an opportunity to precisely explore structural  
142 variation across genospecies. Multiple alignments of representative strains from each  
143 genospecies revealed high chromosomal collinearity (Additional file 1: Fig. S9).

144 From all 196 genomes, 24 distinct RepA sequence groups were identified. However,  
145 four of these correspond to isolated *repA*-like genes that are not part of *repABC*  
146 operons, and twelve others are rare (in no more than four genomes), so eight types  
147 account for nearly all the plasmids (Fig. 4a). We numbered them Rh01 to Rh08  
148 in order of decreasing frequency in the set of genomes. Of these, Rh01 and Rh02,  
149 corresponding to the two chromids pRL12 and pRL11 of the reference strain 3841  
150 [10], are present in every genome. The distribution of the other plasmids shows  
151 some dependence on genospecies, but none is confined to a single genospecies. For  
152 example, Rh03 is present in all strains of gsA, gsB and gsC, but absent from gsE  
153 and in just one gsD strain, while Rh05 is universal in gsA and gsB but absent  
154 elsewhere. The phylogeny of *repA* genes within individual plasmid groups sheds  
155 light on their history of transfer between and within genospecies. In groups Rh01 to  
156 Rh05, each clade in the phylogeny contains strains of a single genospecies, providing  
157 no evidence for recent transfer of these plasmids between genospecies.

158 Symbiosis genes are found on Rh04, Rh06, Rh07 and Rh08 plasmids, depending on  
159 genospecies. Not all symbiosis genes are on scaffolds with *repABC* genes, because

160 of incomplete genome assembly, but the overall picture is clear. Genospecies A  
161 symbiosis plasmids are all Rh06, in gsB they are Rh07, gsC has mostly Rh04 but  
162 some Rh07 and Rh08, gsD has Rh08, gsE has mostly Rh08 but some Rh06 and Rh07.  
163 There are striking differences in the apparent mobility of these plasmids. Conjugal  
164 transfer genes (*tra* and *trb*) are present in some Rh04 plasmids and all Rh07 and  
165 Rh08 plasmids, including those that are symbiosis plasmids. These genes are all  
166 located together immediately upstream of the *repABC* replication and partitioning  
167 operon, in the same arrangement as in the plasmid p42a of *R. etli* CFN42, which  
168 has been classified as a Class I, Group I conjugation system [40].

169 Interestingly, some *repA* sequences of sym plasmids from strains of different  
170 genospecies are identical or almost identical in sequence (Fig. 4b and Additional  
171 file 1: Fig. S10). The phylogenies of the corresponding conjugal transfer genes (e.g.  
172 *traA*, *trbB* and *traG*) show the same pattern (Additional file 1: Fig. S11), indicating  
173 that symbiosis plasmids have introgressed across genospecies boundaries through  
174 conjugation.

#### 175 HGT and intergenic Linkage Disequilibrium

176 Different modes of genetic exchange are expected for the different genomic com-  
177 partments (chromosome, chromids and plasmids), so the rates of DNA exchange  
178 in the symbiosis plasmid cannot be directly correlated to the rates for other plas-  
179 mids. Hence, we evaluated patterns of intergenic linkage disequilibrium (LD) in  
180 the different compartments as a proxy for recombination. High rates of recombina-  
181 tion would reduce the genetic correlations between genes, unless genes or genomic  
182 compartments have been recently acquired.

183 Strong patterns of relatedness in this data can produce biased estimates of LD,  
184 so population structure adjusted genotype matrices were used to estimate LD (see  
185 details in Methods). Genome-wide pairwise comparisons between all genes ordered  
186 by plasmid origin demonstrated different intensities of recombination in the differ-  
187 ent genomic compartments (Fig. 5a). High intergenic correlations were restricted  
188 to genes within each compartment; few inter-compartment interactions were ob-  
189 served. Interestingly, we found that the symbiosis plasmids maintained high levels  
190 of intergenic LD, suggesting that this plasmid has been recently acquired (Fig. 5b).

191 Intergenic LD between all pairs of symbiosis genes showed clear blocks of linkage  
192 disequilibrium similar to those that have been previously described [41] (Fig. 5c).  
193 The small LD blocks within the symbiosis cluster agree with functionality: nod genes  
194 are required for infection and nodule organogenesis, *nifHDKEN* genes encode the  
195 nitrogenase enzyme, and the other *nif* and *fix* genes are needed to support symbi-  
196 otic nitrogen fixation [42]. Intergenic LD before and after correction for population  
197 structure showed how structure can introduce noise and overestimate intergenic LD  
198 (Additional file 1: Fig S12-S13) [43, 44]. No strong evidence for high LD between  
199 symbiosis genes and other genes from different genomic compartments was found.

200 Evidence for sym-plasmid transfer between genospecies was also observed when  
201 analyzing phylogenetic patterns of symbiosis genes in contrast to the species tree  
202 (Fig. 6a, Additional file 1: Fig. S14). Certain clades of identical sequences in single  
203 gene phylogenies included members of different genospecies (Fig. 6b-d), meaning  
204 that these strains shared alleles with strains from other genospecies than their own.  
205 Interestingly, the majority of these strains originated from organic fields.

206 In order to understand if genomic introgression among these sibling species was  
207 restricted to the sym plasmid, analysis of the evolutionary history of single genes  
208 was conducted. We calculated the discordance between the gene trees and the  
209 genospecies classification (discordance score, Additional file 1: Fig. S15; Methods).  
210 If a gene tree resembles the genospecies topology of the species tree, where distinct  
211 clades of genospecies are observed, then the gene would have a zero discordance  
212 score. The results showed that around 20% of the genes have no evidence for trans-  
213 fer between genospecies (discordance equal to zero), 35% have a discordance score  
214 of 1, and 16% have a discordance score of 2, indicating that the majority of the  
215 genes closely follow the species phylogeny. Symbiosis genes are in the tail of this  
216 distribution with a discordance score above 6 (Fig. 7a), in accordance with our  
217 expectations based on our observation of sym-plasmid introgression.

218 Population genetic parameters were contrasted between symbiosis genes and other  
219 classes of gene (Table 1, Additional file 2: Table S6). The results show that the  
220 level of polymorphism overall is similar for symbiosis genes and other genes but  
221 that the diversity is distributed differently. In symbiosis genes, identical or near-  
222 identical haplotypes are more often observed even across several genospecies (Fig.  
223 6). However, several distinct groups of haplotypes exist yielding a very high Tajima's



224 D for symbiosis genes (Additional file 2: Table S7). This suggests either selective  
225 sweeps within these groups, some form of balancing selection among groups, or a  
226 combination of both.

227 By plotting discordance scores to gene locations based on a PacBio reference  
228 genome (SM3), we observed that highly introgressed genes are concentrated in the  
229 smaller plasmids (Fig. 7b). This reflects the most frequent mode of exchange of the  
230 symbiosis plasmids, where entire sym-plasmids are transferred through conjugation  
231 [45]. On the other hand, patterns of introgression on the chromosome are restricted  
232 to small regions, showing evidence of linkage blocks. The functionalities and origin  
233 of the chromosomal introgression islands were further investigated.

#### 234 Chromosomal introgression is restricted to few events

235 We identified two specific chromosomal regions where introgression events predom-  
236 inantly occur. Cluster 1 (Fig. 8b and c, Additional file 2: Tables S8 and S9) was  
237 consistently found in the same region in 87 strains (64 gsC, 23 gsB) downstream  
238 of a core phasin gene. The cluster comprises two regions of accessory genes with  
239 higher than average discordance scores flanking a region of core genes that probably  
240 travels with them and also has elevated discordance (Fig. 8b, Fig. S16).

241 Cluster 1 encodes a type IV secretion system (T4SS) in many strains, and this  
242 T4SS bears a striking resemblance to one of the three T4SSs of *Agrobacterium*  
243 *tumefaciens* C58. Two of these systems, Trb and AvhB, mediate conjugal transfer  
244 of Ti and pAtC58 plasmids, respectively, between *Agrobacterium* cells, whereas the  
245 third system, VirB, transfers DNA from *Agrobacterium* to host plant cells [46, 47].  
246 The overall structure of the cluster 1 T4SS genes most closely resembles that of  
247 the *avhB* system, which includes 10 genes homologous to the *virB* operon and a  
248 DNA transfer and replication (Dtr) system comprising *traG*, *traD*, *traC*, and *traA*  
249 (Fig. 8a). There is a full *avhB* cluster inserted after the phasin gene in 64 out of  
250 87 strains (for example, SM3 in Fig. 8c), whereas 23 strains lack the *traC* homolog  
251 in the Dtr (for example, SM121B). One or two nucleotidyltransferase genes, a *traA*  
252 relaxase gene, and DNA polymerase gene are conserved downstream of the *avhB*  
253 cluster and in synteny within the introgressed region.

254 Not all strains have *avhB* in cluster 1: 5 strains, including SM170C and SM153D  
255 (Fig. 8c) have a DNA rearrangement system that includes an ATP-dependent DNA

256 ligase, a metallophosphatase superfamily gene, and a high number of hypothetical  
257 proteins (Additional file 2: Table S9). In 104 strains there was no insert at the start of  
258 cluster 1. All strains have a discordant cluster of polysaccharide metabolism genes,  
259 which seems to travel with the chromosomal island, but these genes are distinctive  
260 in strains without the initial insert, such as SM4 and SM100 (Fig. 8c).

261 Cluster 2 (Fig. 8d, Table S8) was found in all 196 strains. It contained a large  
262 number of hypothetical proteins, many of which contained conserved domains cor-  
263 responding to transposases and integrases. No obvious DNA transfer mechanism  
264 that could mediate the transfer between genospecies was discovered in this island.  
265 However, we observed toxin-antitoxin (*VapC/YefM*) genes within this cluster; these  
266 represent the type II toxin-antitoxin system, which is a homologue of T4 RNase H  
267 with a PIN domain [48] and is thought to move from one genome to another by  
268 horizontal gene transfer [49].

269 We have also evaluated population genetic parameters of highly discordant chro-  
270 mosomal genes (Additional file 2: Table S8). In contrast to the symbiosis genes,  
271 chromosomal introgressed genes have lower than average Tajima's D values that  
272 are not significantly different from zero, which suggests that these genes are evol-  
273 ving as expected under neutrality.

#### 274 Other modes of genetic exchange

275 Phage-mediated introgression is another mechanism of horizontal gene transfer that  
276 could drive gene introgression between bacterial strains and even genospecies. It is  
277 well known that during transduction, bacterial host genetic material can be trans-  
278 ported to another bacterium by incorporation into phage vectors [50]. Additionally,  
279 a greater similarity between genomes has been suggested to increase the proba-  
280 bility of successful introgression by transduction, although both trans-species and  
281 trans-genus DNA transduction has been known to occur [51].

282 In order to evaluate the extent of phage-mediated gene transfer between  
283 genospecies, we used PHASTER [52, 53], an online platform for prophage anno-  
284 tation in bacterial genomes. This identified 344 unique homologous phage protein  
285 families from our 196 *Rhizobium* genomes (Additional file 1: Fig. S17a, Additional  
286 file 2: Table S10). The most abundant phage protein identified was a putative por-

287 tal protein homologous to that in *Brucella* phage Pr (gi418487847), which is an  
288 essential component of stable DNA encapsidation [54].

289 Phylogenetic analysis shows that individual homologous phage proteins have the  
290 tendency to cluster by genospecies; however, due to high conservation of protein se-  
291 quences, different genospecies are found in the same clades. We therefore speculate  
292 that phages have the ability to transduce between genospecies, but are more often  
293 transducing within genospecies where strains are more genetically similar (Addi-  
294 tional file 1: Fig. S18b).

295 Furthermore, to confirm that observed chromosomal gene introgressions were not  
296 predominantly a consequence of phage-mediated introgression, we calculated the  
297 base pair (bp) distance between phage proteins and the two chromosomal clus-  
298 ter regions. Only six strains (2 gsA, 4 gsC) out of 87 contained phage proteins  
299 closer than 15,000bp to the cluster 1 start site. Three gsC and the two gsA strains  
300 had phage proteins located upstream of the cluster start site, and only one gsC  
301 strain had identified phage proteins downstream. The two gsA strains and one  
302 gsC strain incorporated phage proteins 3,000-5,000 bp upstream from the cluster 1  
303 start site. These proteins were identified as transposases (gi209447153, gi26989834,  
304 gi17546153, gi209447152, gi209447153). However, cluster and phage presence are not  
305 concordant, and 25 of 87 strains possessing the cluster had no identifiable prophage  
306 regions in their genomes. Similarly, strains sharing homologous phage proteins did  
307 not necessarily have the gene cluster.

308 Only the two strains from gsA (SM154C and SM163B) showed potential evidence  
309 for recent phage introgression near the cluster, with four orthologous phage proteins  
310 located exactly the same base pair distance from the cluster start site in both strains.

## 311 **Discussion**

312 Five related but distinct genospecies can be found in sympatry

313 We have assembled the genomes of 196 *Rhizobium leguminosarum* strains, which  
314 were isolated from root nodules of white clover (*Trifolium repens*) in three different  
315 European countries and under two management regimes: field trial sites in Denmark  
316 (DK), France (F), and the United Kingdom (UK), and organic fields in Denmark  
317 (DKO). Multiple samples from the same field were collected in order to capture  
318 as much of the genetic variation as possible. Based on the analysis of SNPs, we

319 observed clear patterns of genomic clustering into five genospecies as previously  
320 reported [38] (Figure 1a). The average nucleotide identity of conserved core genes  
321 and the number of shared orthologous genes (Fig. 1b and c) also reflected the five  
322 distinct genospecies. Multiple genospecies were observed at the same field site, as  
323 previously reported [38]. The distinct genospecies thus coexist in sympatry, but  
324 remain genetically well separated.

325 The core genomes of the genospecies are completely diverged

326 Although sympatry is observed, analysis of individual gene trees showed that hori-  
327 zontal gene transfer has been mainly confined to symbiosis plasmids and two chro-  
328 mosomal islands. The occurrence of HGT of symbiosis genes within and between  
329 distant rhizobia genera (*Rhizobium*, *Bradyrhizobium*, *Sinorhizobium*, *Azorhizobium*,  
330 and *Mesorhizobium*), nodulating different legume species, has been widely reported  
331 [33, 55, 27, 56, 29]. This shows that symbiosis gene transfer is not restricted by  
332 genetic divergence and in many cases is not species specific [57]. Studies comparing  
333 rhizobial genera have shown that HGT of the symbiosis apparatus occurred through  
334 the transfer of symbiosis plasmid (pSym) or genomic islands [58, 59, 60, 61].

335 The genetic differentiation maintained in the core genome of these genospecies  
336 could have been caused by rather high rates of within-genospecies compared to inter-  
337 species homologous recombination [62, 33, 4]. Based on intragenic LD analysis (Fig  
338 3c), we observed LD decay that is indicative of fairly high rates of within-genospecies  
339 homologous recombination [38, 33, 63]. Interspecies recombination may be restricted  
340 by the genetic divergence between strains, and this is an important factor in speci-  
341 ation of many prokaryotes (*Vibrio* [19, 26]; *Rhizobium* [33] and *Salmonella enterica*  
342 [64]).

343 Selection also plays an important role in shaping genospecies divergence. We have  
344 shown here that the genospecies have remarkably different demographic histories  
345 and, therefore, have been affected differently by purifying selection (Fig 3a and  
346 3b). Despite clear genetic differentiation, these strains have maintained very syn-  
347 tenic chromosomes and chromids (Rh01 and Rh02). The chromids have genomic  
348 signatures (GC content, nucleotide diversity composition, low interspecies recombi-  
349 nation) that more closely resemble those of the chromosome than of the plasmids  
350 [11, 37, 33]. The strong conservation of the genomic organization highlights the

351 essential nature of core genes and the possible selective constraints preventing ge-  
352 nomic rearrangements and HGT [65]. By contrast, plasmids are more plastic, with  
353 multiple rearrangements and lower median GC content (Fig. 2c). This may reflect  
354 differences in selective pressures, with core genes being subject to stronger purifying  
355 selection compared to the accessory genome [66].

#### 356 Symbiosis gene introgression is driven by conjugative plasmids

357 The genospecies studied here displayed a diverse set of plasmid profiles (Fig. 4a),  
358 as has been previously described in these and other *Rhizobium* species [10, 67, 68].  
359 The distribution of these plasmids shows some dependence on genospecies, but no  
360 plasmid type is confined to a single species, and plasmids therefore seem to have  
361 been transferred among genospecies. Symbiosis plasmids can belong to any of a  
362 number of plasmid types (Rh04, Rh06, Rh07 and Rh08), and phylogenetic evidence  
363 indicated that some of them have been transferred through conjugation between  
364 different genospecies (Fig. 4b). These transfers are likely recent, since the sequences  
365 have not yet diverged at all. Because conjugation requires cell-to-cell contact, it is  
366 evident that plasmid transfer is not just constrained by genetic similarity [69, 33],  
367 but also by the requirement that donor and recipient are found in the same location,  
368 again underlying the sympatric nature of these sibling species.

#### 369 Chromosomal introgression events were detected based on phylogenetic discordance

370 Evidence for sym-plasmid transfer between genospecies was also observed when  
371 analyzing phylogenetic patterns of symbiosis genes in contrast to the species tree  
372 (Fig. 6). These results led us to develop a phylogenetic method that calculates  
373 discordance scores based on gene tree deviations from the overall genospecies clas-  
374 sification. Many phylogenetic [70, 71, 72] and parametric methods [73, 74, 75] have  
375 been previously used to detect HGT events. Parametric methods characterize se-  
376 quence composition (GC content, codon usage, sequence conservation) and search  
377 for regions of the genome that significantly deviate from the genomic average [76].  
378 These approaches rely on the uniformity of the host signature and on a relative  
379 distant origin of the exogenous sequences [73]. For many HGT events these as-  
380 sumptions are unrealistic, especially when dealing with ancient DNA acquisitions  
381 [77, 78]. On the other hand, phylogenetic methods can integrate information from  
382 multiple genomes using a specific evolutionary model [76]. The comparison of a

383 large number of genomes, combined with a well-defined species tree and carefully  
384 pruned orthologous gene groups, gave us enough power to confidently find genes  
385 strongly deviating from the species phylogeny.

386 Based on our phylogenetic method, we identified two events of chromosomal in-  
387 trogression where clusters of genes were transferred between genospecies. Cluster  
388 1 includes genes that bear a striking resemblance to the *Agrobacterium tumefa-*  
389 *ciens* AvhB type IV secretion system that mediates the transfer of a small plasmid  
390 (pAtc58) to a donor cell [47]. Therefore we hypothesize that the transfer of this chro-  
391 mosomal island is mediated by the combination of a full VirB conjugative system  
392 and a *tra* DNA transfer and replication system [79].

393 The *avhB* gene cassette and the *traG* gene in cluster 1 also show similar organ-  
394 isation to a conjugative transfer system encoded by the *virB/traG* of the plasmid  
395 pSymA of *S. meliloti* [80, 81] and to the *virB/virD4* of *Bartonella tribocorum* [82].  
396 However, both T4SSs in *A. tumefaciens* and *S. meliloti* (AvhB and VirB, respec-  
397 tively) mediate the transfer of whole plasmids, whereas we are proposing that the  
398 T4SS encoded in cluster 1 mediates the transfer of an integrative conjugative ele-  
399 ment (ICE). Other integrative and conjugative elements have been observed in the  
400 rhizobial genera (*Azorhizobium caulinodans*: [61], *Sinorhizobium*: [83]) and in other  
401 species (*Streptococcus agalactiae*: [84], *Bacillus subtilis*: [85], *V. cholerae*: [86]).

402 In cluster 2 we found toxin-antitoxin (TA) genes located within the cluster, but we  
403 could not determine a putative transfer mechanism. The maintenance of integrative  
404 conjugative elements (ICE) is in many cases mediated by the presence of functional  
405 toxin-antitoxins [87, 88, 89]. The loss of these TA genes causes a post-segregational  
406 killing of the bacterial cell by the toxin's destructive effect [88]. Chromosomally-  
407 encoded TA systems have been shown to protect against large-scale deletion of  
408 genomic islands [90], but have also been reported to have different functions in the  
409 host [88].

410 Mobile genetic elements (MGEs), such as sym plasmids and ICEs, are important  
411 for the evolution of bacterial species, since a single event (conjugation of entire  
412 mobile plasmids or insertion of gene sets) can introduce a whole set of new func-  
413 tions to the recipient that can drastically change its lifestyle (*e.g.* from free-living  
414 bacterium to symbiont) [61]. Many of these genes in the chromosomal islands may  
415 not confer any adaptive advantage, and they have possibly hitch-hiked along with

416 proximally located positively selected genes. This could be the reason that we see  
417 striking discordance peaks in the two chromosomal islands (Fig. 7b). MGEs can also  
418 be viewed as elements with independent evolutionary trajectories to their host. The  
419 presence of a toxin-antitoxin system placed close to the second cluster shows one of  
420 the possible strategies that these elements deploy to increase their own fitness and  
421 vertical propagation.

422 Our results indicate that conjugation is the predominant mechanism of intro-  
423 gression among the five genospecies, but we also investigated the effect of phage-  
424 mediated transduction. Despite the presence of prophage sequences within the ma-  
425 jority of the genomes, we found that phage-related proteins were not linked to the  
426 chromosomal islands and did not have high discordance scores (Additional file 1:  
427 Fig. S18). While genetic transduction is known to be an important mechanism for  
428 bacterial adaptation in many different species (*P. aeruginosa*: [91]; *Escherichia coli*:  
429 [92], *Staphylococcus aureus* [93]), phages do not appear to play a dominant role in  
430 gene introgression for our set of *R. leguminosarum* strains.

#### 431 Symbiosis genes and genomic islands introgressed independently

432 Since we found a very limited number of major introgression events, we investigated  
433 whether they might all be related to symbiosis gene transfer. We first examined this  
434 by exploring intergenic linkage disequilibrium by applying the Mantel test to pairs  
435 of gene genetic relationship matrices (GRM's) using population-structure corrected  
436 markers, which reduced the overestimation of genetic linkage due to population  
437 structure (Additional file 1: Fig. S11-S12). Although we observed high linkage dise-  
438 quilibrium within sym-clusters, symbiosis genes did not appear to be linked to the  
439 chromosomal islands (Fig 6).

440 We found significantly positive values of Tajima's D for the symbiosis genes, which  
441 indicates the presence of several distinct groups of haplotypes. This distinguished  
442 the symbiosis genes not just from the core genome, but also from most of the  
443 accessory gene set (Fig. 7, Table 1). Evidence for similar balancing selection of  
444 symbiosis genes was previously reported for *Rhizobium leguminosarum* *bv. viciae*  
445 [94]), whereas purifying selection was observed in the *nod* gene region of *Sinorhizo-*  
446 *bium medicae* [95]. In contrast, the introgressed chromosomal islands did not seem  
447 to have been subject to strong selective pressures, since the majority of the intro-

448 gressed genes in these regions did not show Tajima's D values significantly different  
449 from zero. The lack of genetic linkage and different selection signatures suggest that  
450 the symbiosis plasmids and chromosomal islands introgressed independently.

## 451 **Conclusions**

452 Five genospecies in the *R. leguminosarum* species complex are frequently sympatric  
453 but maintain distinct genetic variants of their core genes, demonstrating a lack  
454 of significant introgression in the core genome. Many accessory genes are found  
455 across two or more genospecies but, surprisingly, their phylogenies indicate that  
456 most of them have no recent history of introgression between genospecies. Striking  
457 exceptions are the genes sitting in symbiosis plasmids, especially the symbiosis  
458 genes, and two small chromosomal islands of unknown function.

## 459 **Methods**

### 460 **Rhizobium sampling and isolation**

461 White clover (*Trifolium repens*) roots were collected from three different breeding  
462 trial sites in the United Kingdom (UK), Denmark (DK), and France (F) (Additional  
463 file 1: Fig. S1A), and 50 Danish organic fields (DKO) (Additional file 1: Fig. S1b).  
464 Roots were sampled from 40 different plots from each trial site. The total number  
465 of plots was 170. The samples were stored at ambient temperature for 1-2 days and  
466 in the cold room (2°C) for 2-5 days prior to processing. Pink nodules were collected  
467 from all samples, and a single bacterial strain was isolated from each nodule as  
468 described by [96]. From each plot, 1 to 4 independent isolates were produced. In total  
469 249 strains were isolated from *T. repens* nodules. For each site the clover varieties  
470 were known, and representative soil samples from clover-free patches were collected  
471 and sent for chemical analysis. Furthermore, site-specific geographic information  
472 system (latitude and longitude) were collected (Additional file 2: Table S1).

### 473 **Genome assembly**

474 A representative set of of 196 strains was subjected to whole genome shotgun se-  
475 quencing using 2x250 bp Illumina (Illumina, Inc., USA) paired-end reads by Mi-  
476 crobesNG ([97], IMI - School of Biosciences, University of Birmingham). In addition,  
477 8 out of the 196 strains were re-sequenced using PacBio (Pacific Biosciences of Cal-  
478 ifornia, Inc., USA) sequencing technology (Additional file 2: Table S2, Additional



479 file 1: Fig. S2). Analysis of 16S rDNA confirmed that all 196 of the strains were  
480 *Rhizobium leguminosarum*.

481 Genomes were assembled using SPAdes (v. 3.6.2) [98]. SPAdes contigs were cleaned  
482 and assembled further, one strain at a time, using a custom Python script (Jigome,  
483 available at [99]). First, low-coverage contigs were discarded because they were  
484 mostly contaminants from other genomes sequenced in the same Illumina run. The  
485 criterion for exclusion was a SPAdes k-mer coverage less than 30% of the median  
486 coverage of putative single-copy contigs (those > 10kb). Next, putative chromoso-  
487 mal contigs were identified by the presence of conserved genes that represent the  
488 syntenic chromosomal backbone common to all *R. leguminosarum* genospecies. A  
489 list of 3215 genes that were present, in the same order, in the chromosomal unitigs  
490 of all eight of the PacBio assemblies was used to query the Illumina assemblies using  
491 *blastn* ( $\geq 90\%$  identity over  $\geq 90\%$  of the query length). In addition, contigs carry-  
492 ing *repABC* plasmid replication genes were identified using a set of *RepA* protein  
493 sequences representing the twenty distinct plasmid groups found in these genomes  
494 (*tblastn* search requiring  $\geq 95\%$  identity over  $\geq 90\%$  of the query length). A 'contig  
495 graph' of possible links between neighbouring contigs was created by identifying  
496 overlaps of complete sequence identity between the ends of contigs. The overlaps  
497 created by SPAdes were usually 127 nt, although overlaps down to 91 nt were ac-  
498 cepted. Contigs were flagged as 'unique' if they had no more than one connection  
499 at either end, or if they were > 10 kb in length. Other contigs were treated as  
500 potential repeats. The final source of information used for scaffolding by Jigome  
501 was a reference set of *R. leguminosarum* genome assemblies that included the eight  
502 PacBio assemblies and 39 genomes publicly available in GenBank [99]. A 500-nt tag  
503 near each end of each contig, excluding the terminal overlap, was used to search this  
504 database by *blastn*; high-scoring matches to the same reference sequence, with the  
505 correct spacing and orientation, were subsequently used to choose the most proba-  
506 ble connections through repeat contigs. Scaffolding was initiated by placing all the  
507 chromosomal backbone contigs in the correct order and orientation, based on the  
508 conserved genes that they carried, and extending each of them in both directions,  
509 using the contig graph and the pool of remaining non-plasmid contigs, until the  
510 next backbone contig was reached or no unambiguous extension was possible. Then  
511 each contig carrying an identified plasmid origin was similarly extended as far as

512 possible until the scaffold became circular or no further extension was justified, and  
513 unique contigs that remained unconnected to chromosomal or plasmid scaffolds were  
514 extended. Finally, scaffolds were connected if their ends had appropriately spaced  
515 matches in the reference genomes. Scaffold sequences were assembled using over-  
516 lap sequences to splice adjacent contigs exactly, or inserting an arbitrary spacer of  
517 twenty "N" symbols if adjacent contigs did not overlap. The *dnaA* gene (which was  
518 the first gene in the chromosomal backbone set and is normally close to the chromo-  
519 somal origin of replication) was located in the first chromosomal scaffold, and this  
520 scaffold was split in two, with chromosome-01 starting 127 nt upstream of the ATG  
521 of *dnaA* and chromosome-00 ending immediately before the ATG. The remaining  
522 chromosomal scaffolds were numbered consecutively, corresponding to their position  
523 in the chromosome. Plasmid scaffolds were labelled with the identifier of the *repA*  
524 gene that they carried. Scaffolds that could not be assigned to the chromosome or a  
525 specific plasmid were labelled 'fragment' and numbered in order of decreasing size.  
526 Subsequent analysis revealed large exact repeats in a few assemblies. These were  
527 either internal inverted repeats in the contigs created by SPAdes (5 instances) or  
528 large contigs used more than once in Jigome assemblies (18 instances). They were  
529 presumed to be artifacts and removed individually.

530 Assembly statistics were generated with QUAST (v 4.6.3, default parameters)  
531 [100]. (Additional file 1: S3). Genes were predicted using PROKKA (v 1.12) [101].  
532 In summary, genomes were assembled into [10-96] scaffolds, with total lengths of  
533 [8355366-6967649] containing [6,642-8,074] annotated genes, indicating that we have  
534 produced assemblies of reasonable quality, which comprehensively captured the gene  
535 content of the sequenced strains (Additional file 2: Table S2 and S3).

### 536 Orthologous genes prediction

537 Orthologous gene groups were identified among a total of 1,468,264 gene prod-  
538 ucts present across all (196) strains. We used two different software packages for  
539 ortholog identification: Proteinortho [102] and Syntenizer3000 [103]. The software  
540 Proteinortho [102, 104] (v5.16b), was executed with default parameters and the syn-  
541 teny flag enabled, to predict homologous genes while taking into account their phys-  
542 ical location. For the analysis in this paper, we were only interested in orthologs and  
543 not paralogs. Paralogous genes predicted by Proteinortho were carefully filtered out

544 by analyzing the synteny of homologous genes surrounded by a 40-gene neighbour-  
545 hood (see Synteny section). After this filtering step, the orthologous gene groups  
546 were aligned using ClustalO ([105], v. 1.2.0). Each gene sequence was translated to  
547 its corresponding amino acid sequence before alignment and back-translated to the  
548 original nucleotides. Each gap was replaced by 3 gaps, resulting in a codon-aware  
549 nucleotide alignment. Manual check of highly diverse genes (nucleotide diversity  
550  $> 0.2$ ) was conducted. We observed that many of these genes were composed of  
551 fragmented/partial genes, wrongly assigned orthologous groups, composed of few  
552 taxa and were enriched for "hypothetical proteins" annotation. Therefore, for the  
553 population genetic analysis we filtered out these possibly problematic genes with a  
554 ANI cutoff equal to 0.65.

#### 555 Synteny

556 First, gene groups were aligned with their neighbourhoods (20 genes each side) using  
557 a modified version of the Needleman-Wunsch algorithm [106]. We counted the num-  
558 ber of gene neighbours that were syntenic across strains before a collinearity break.  
559 We used this score to disambiguate gene groups that contain paralogs. Paralogs are  
560 the result of gene duplication, and as such one of the paralogs is the original, and  
561 the rest are copies. Based on similarity, we kept the least divergent gene inside of  
562 the original homology group while removing the copied paralogs, if possible into a  
563 new gene group. Orphan genes, that were present only in one strain, were removed  
564 from the analysis.

#### 565 Variant Calling

566 Codon-aware alignments were used in order to detect single nucleotide polymor-  
567 phisms (SNPs). For a given gene alignment (individuals as rows and sequence as  
568 columns) and position, we first counted the number of unique nucleotides (A, C,  
569 T, G). Columns containing 2 unique nucleotides were considered variable sites (bi-  
570 allelic SNPs). After finding variable sites, SNP matrices were encoded as follows:  
571 major alleles were encoded as 1 and minor alleles as 0. Gaps were replaced by the  
572 column mean. Later steps were executed in order to filter out unreliable SNPs. We  
573 restricted the analyses to genes found in at least 100 strains. By looking at the  
574 variants and their codon context, we excluded SNPs placed in codons containing  
575 gaps, or containing more than one SNP, or with multi-allelic SNPs. Based on these

576 criteria we ended up with 6,529 genes and 441,287 SNPs. Scripts and pipelines are  
577 available at a github repository [107].

#### 578 Plasmid replicon groups

579 Plasmid replication genes (*repABC* operons) were located in the genome assemblies  
580 by *tblastn*, initially using the RepA protein sequences of the reference strain 3841  
581 as queries. Hits covering  $\geq 70\%$  of the query length were accepted as repA genes,  
582 and those with  $\geq 90\%$  amino acid identity were considered to belong to the same  
583 replication group (putative plasmid compatibility group). Hits with lower identity  
584 were used to define reference sequences for additional groups, using sequences from  
585 published *Rhizobium* genomes when available, or from strains in this study. Groups  
586 were numbered (Rh01, etc) in order of decreasing abundance in the genome set.  
587 RepB and RepC sequences corresponding to the same operons as the RepA ref-  
588 erences were used to check whether the full *repABC* operon was present at each  
589 location, requiring  $\geq 85\%$  amino acid identity.

#### 590 Presence of symbiosis genes in all strains

591 Since all sequenced strains were isolated from white clover nodules, they are ex-  
592 pected to carry the canonical symbiosis genes. One strain, SM168B, carried no  
593 symbiosis genes. Subsequent nodulation tests showed that the strain could colonize  
594 white clover and produce pink nodules, suggesting that the genes were lost during  
595 the pre-sequencing processing. On the other hand, strains SM165B and SM95 were  
596 found to have duplicated symbiosis regions.

#### 597 Average nucleotide identity of core genes

598 In order to place 196 strains into the previously described genospecies [38], a phy-  
599 logenetic tree was first constructed based on a single gene (*rpoB*) (Additional file  
600 1: Fig. S6). The tree contained representative genospecies identifiers and the RpoB  
601 sequence alignment of each strain member. After classification of genospecies, we  
602 calculated pairwise average nucleotide identity (Fig. 1B) based on the concatena-  
603 tion of 282 core bacterial genes (331617 bp) of chromid-bearing bacteria established  
604 by Harrison *et al.* 2010 (Additional file 2: Table S4).

## 605 Pangenome

606 Pangenome analyses were based on comparisons of orthologous gene families by  
607 carefully excluding singletons of each strain. A variance measure was added by  
608 randomly permuting the order of strains 20 times.

## 609 Principal Component Analysis

610 Principal Component Analysis was based on a total of 6,529 genes that were present  
611 in at least 100 strains (441287 SNPs). A minimal minor allele frequency threshold  
612 of 0.10 was used to filter out rare variants. Individual gene covariances were then  
613 computed as follows:

614 Let  $N$  denote the total number of individuals and  $M$  the total number of markers,  
615 the full genotype matrix ( $X$ ) for a given gene has  $N \times M$  dimensions with genotypes  
616 encoded as 0's and 1's for the  $N$  haploid individuals. Each column  $S_i$  ( $i = 1, \dots, M$ )  
617 of the  $X$  matrix is a vector of SNP information of size  $N$ . The first step of the  
618 calculation was to apply a Z-score normalization to each SNP vector by subtracting  
619 by its mean and dividing it by its standard deviation:  $\left(\frac{S_i - \bar{S}_i}{\sqrt{Var(S_i)}}\right)$ , this results in  
620 a vector with mean 0 and variance 1, where SNPs are assumed to be independently  
621 sampled from a distribution with covariance matrix  $V$ . We then computed the  
622 covariance matrix between individuals as follows:

$$623 \quad Cov(X_i) = \hat{V} = \frac{1}{M-1} \sum_{i=1}^M (X_i - \bar{X})(X_i - \bar{X})'$$

624  $Cov(X)$  can also be computed by the dot product of the full genotype matrix:

$$625 \quad Cov(X) = \hat{V} = XX'$$

626 The result is an  $N \times N$  matrix, where  $N$  is the number of strains. This matrix is  
627 also known as the Genomic Relationship Matrix (GRM) [108]. We then decomposed  
628 the GRM using the `linalg` function of `scipy` (python library).

## 629 Population genetic analysis

630 Population genetic parameters (Tajima's D, nucleotide diversity, average pairwise  
631 differences ( $\pi$ ) and number of segregating sites) were estimated using the python  
632 library `dendropy` [109].

## 633 Intragenic LD

634 Intragenic linkage disequilibrium (LD) measures the dependence between SNPs  
635 within a gene and it was estimated using Pearson's  $r^2$  correlation measure. This

636 analysis was done within each population, therefore, we did not use the corrected  
637 genotype matrices.

638 Each individual genotype matrix (containing a minimal set of 3 SNPs) was first  
639 normalized as described in the PCA section. After this normalization, each SNP  
640 contributes equally to the downstream analysis. LD was then calculated as a func-  
641 tion of distance  $d$  (maximum 2000 base pairs apart) and was computed as the  
642 average LD of SNPs  $d$  base pairs away from each other. The calculations were done  
643 in the following way:

$$644 \quad \text{Cor}(X_i, X_j) = \frac{\text{Cov}(X_i, X_j)}{\sqrt{\text{Var}(X_i)\text{Var}(X_j)}} \\ 645 \quad r^2 = \text{Cor}(X_i, X_j)^2$$

646 In which  $j > i$  and  $X_i$  is composed of the genotypes of all individuals of a given  
647 genospecies for position  $i$  in the genotype matrix.  $X_j$  is composed of the genotypes  
648 of all individuals of the same genospecies for position  $j$  in the genotype matrix, and  
649  $d = j - i$  and  $d \leq 2000$  base pairs. Results were summarized into bins of size 10.

#### 650 Intergenic Linkage Disequilibrium corrected for population structure

651 Sample structure or relatedness between genotyped individuals leads to biased esti-  
652 mates of linkage disequilibrium (LD) and increase of type I error. In order to correct  
653 for the autocorrelation present in this data, the genotype matrix  $X$  (coded as 0's  
654 and 1's) was adjusted as exemplified in [110]. The covariance  $V$  between individuals  
655 was calculated first (as shown in the Principal Component Analysis section). Then  
656 the 'decorrelation' of genotype matrix  $X$  was done by multiplying  $X$  by the inverse  
657 of the square root of  $\hat{V}$  as follows:

$$658 \quad T_i = \hat{V}^{-\frac{1}{2}} X_i$$

659  $T$  is therefore the pseudo SNP matrix, which is corrected for population structure.  
660 The correlation between genes matrices was obtained by applying a Mantel test to  
661 the GRM (genetic distances) between pairs of genes:

662 For a data set composed of a distance matrix of gene  $X$  ( $D_{ij}^x$ ) and a genetic  
663 distance matrix of gene  $Y$  ( $D_{ij}^y$ ), the scalar product of these matrices was computed,  
664 adjusted by the means and the variances ( $\text{Var}(X)$  and  $\text{Var}(Y)$ ) of the matrices  $X$   
665 and  $Y$ :

$$666 \quad r_{cor} = \frac{\sum (D_{ij}^x - \bar{X})(D_{ij}^y - \bar{Y})}{\sqrt{\text{Var}(X)\text{Var}(Y)}}$$

667 The standardized Mantel test is actually the Pearson correlation between the  
668 elements of genes  $X$  and  $Y$ .

#### 669 Discordance Score

670 Individual gene trees were first constructed using the neighbour-joining clustering  
671 method (software RapidNJ version 2.3.2) [111]. Each tree was traversed based on  
672 depth first traversal algorithm, by visiting each node after visiting its left child  
673 and before visiting its right child, searching deeper in the tree whenever possible.  
674 When the leaf of the tree was reached, the strain number and its genospecies origin  
675 were extracted. A list containing the genospecies was stored for the entire tree. The  
676 discordance score was computed as following:

$$677 \text{Discordance score} = \# \text{shifts} - \text{set}(\text{genospecies}) + 1$$

678 The discordance score evaluates the number of times a shift (from one genospecies  
679 to another) is observed in a branch. The minimum possible is the total number of  
680 genospecies -1 shifts. A tree congruent to the species tree must have a discordance  
681 score equal to zero. (Additional data 1: Fig. S15).

#### 682 Competing interests

683 The authors declare that they have no competing interests.

#### 684 Author's contributions

685 Conceptualization: MIAC, JPWY, SM, MHS and SUA; Methodology: MIAC, JPWY and SM; Software: MIAC, AB,  
686 BV, JPWY and CM; Validation: MIAC, CM, SM, JPWY; Formal Analysis: MIAC, JPWY, CM, SM, AB, BV and  
687 BF; Investigation: SM; Resources: SUA, JPWY and MHS; Data Curation: MIAC, CM, JPWY, SM, SUA and MHS;  
688 Writing - Original Draft: MIAC; Writing - Review and Editing: MIAC, JPWY, SUA, MHS, SM, BV; Visualization:  
689 MIAC, SM, JPWY; Supervision: SUA, JPWY, MHS; Project Administration: SUA; Funding Acquisition: SUA.

#### 690 Acknowledgements

691 This work was funded by grant no. 4105-00007A from Innovation Fund Denmark (S.U.A.). Genome sequencing was  
692 provided by MicrobesNG [97], which is supported by the BBSRC (grant number BB/L024209/1). The authors  
693 would also like to thank industrial partners DLF Trifolium, SEGES and Legume Technology Ltd. for their  
694 contribution to the field trials.

#### 695 Author details

696 <sup>1</sup>Bioinformatics Research Center, Aarhus University, Aarhus, Denmark. <sup>2</sup>Department of Molecular Biology and  
697 Genetics, Aarhus University, Aarhus, Denmark. <sup>3</sup>Department of Biology, University of York, York, United Kingdom.

#### 698 References

- 699 1. Lawrence, J.G.: Gene transfer in bacteria: speciation without species? *Theoretical population biology* **61**(4),  
700 449–460 (2002)
- 701 2. Gogarten, J.P., Doolittle, W.F., Lawrence, J.G.: Prokaryotic evolution in light of gene transfer. *Molecular*  
702 *biology and evolution* **19**(12), 2226–2238 (2002)
- 703 3. Cohan, F.M.: Bacterial species and speciation. *Systematic biology* **50**(4), 513–524 (2001)
- 704 4. Cohan, F.M.: Bacterial speciation: genetic sweeps in bacterial species. *Current Biology* **26**(3), 112–115 (2016)

- 705 5. Fraser, C., Alm, E.J., Polz, M.F., Spratt, B.G., Hanage, W.P.: The bacterial species challenge: making sense  
706 of genetic and ecological diversity. *science* **323**(5915), 741–746 (2009)
- 707 6. Gevers, D., Cohan, F.M., Lawrence, J.G., Spratt, B.G., Coenye, T., Feil, E.J., Stackebrandt, E., Van de Peer,  
708 Y., Vandamme, P., Thompson, F.L., *et al.*: Re-evaluating prokaryotic species. *Nature Reviews Microbiology*  
709 **3**(9), 733 (2005)
- 710 7. Shapiro, B.J., Leducq, J.-B., Mallet, J.: What is speciation? *PLoS genetics* **12**(3), 1005860 (2016)
- 711 8. Ochman, H., Lawrence, J.G., Groisman, E.A.: Lateral gene transfer and the nature of bacterial innovation.  
712 *nature* **405**(6784), 299 (2000)
- 713 9. Hanage, W.P.: Not so simple after all: bacteria, their population genetics, and recombination. *Cold Spring*  
714 *Harbor perspectives in biology*, 018069 (2016)
- 715 10. Young, J.P.W., Crossman, L.C., Johnston, A.W., Thomson, N.R., Ghazoui, Z.F., Hull, K.H., Wexler, M.,  
716 Curson, A.R., Todd, J.D., Poole, P.S., *et al.*: The genome of rhizobium leguminosarum has recognizable core  
717 and accessory components. *Genome biology* **7**(4), 34 (2006)
- 718 11. diCenzo, G.C., Finan, T.M.: The divided bacterial genome: Structure, function, and evolution. *Microbiology*  
719 *and Molecular Biology Reviews* **81**(3) (2017)
- 720 12. Jiao, J., Ni, M., Zhang, B., Zhang, Z., Young, J.P.W., Chan, T.-F., Chen, W.X., Lam, H.-M., Tian, C.F.:  
721 Coordinated regulation of core and accessory genes in the multipartite genome of sinorhizobium fredii. *PLoS*  
722 *genetics* **14**(5), 1007428 (2018)
- 723 13. von Wintersdorff, C.J., Penders, J., van Niekerk, J.M., Mills, N.D., Majumder, S., van Alphen, L.B.,  
724 Savelkoul, P.H., Wolfs, P.F.: Dissemination of antimicrobial resistance in microbial ecosystems through  
725 horizontal gene transfer. *Frontiers in microbiology* **7**, 173 (2016)
- 726 14. Sobczyk, P.A., Coombs, J.M.: In: Gogarten, M.B., Gogarten, J.P., Olendzenski, L.C. (eds.) Horizontal gene  
727 transfer in metal and radionuclide contaminated soils, pp. 455–472. Springer, Switzerland (2009)
- 728 15. Ward, D.M.: A macrobiological perspective on microbial species. *Microbe-american society for microbiology*  
729 **1**(6), 269 (2006)
- 730 16. Cohan, F.M.: Towards a conceptual and operational union of bacterial systematics, ecology, and evolution.  
731 *Philosophical Transactions of the Royal Society B: Biological Sciences* **361**(1475), 1985 (2006)
- 732 17. Shapiro, B.J., Polz, M.F.: Ordering microbial diversity into ecologically and genetically cohesive units. *Trends*  
733 *in microbiology* **22**(5), 235–247 (2014)
- 734 18. Hunt, D.E., David, L.A., Gevers, D., Preheim, S.P., Alm, E.J., Polz, M.F.: Resource partitioning and  
735 sympatric differentiation among closely related bacterioplankton. *Science* **320**(5879), 1081–1085 (2008)
- 736 19. Polz, M.F., Alm, E.J., Hanage, W.P.: Horizontal gene transfer and the evolution of bacterial and archaeal  
737 population structure. *Trends in Genetics* **29**(3), 170–175 (2013)
- 738 20. Cohan, F.M.: Does recombination constrain neutral divergence among bacterial taxa? *Evolution* **49**(1),  
739 164–175 (1995)
- 740 21. Vulić, M., Dionisio, F., Taddei, F., Radman, M.: Molecular keys to speciation: Dna polymorphism and the  
741 control of genetic exchange in enterobacteria. *Proceedings of the National Academy of Sciences* **94**(18),  
742 9763–9767 (1997)
- 743 22. Majewski, J., Cohan, F.M.: Dna sequence similarity requirements for interspecific recombination in bacillus.  
744 *Genetics* **153**(4), 1525–1533 (1999)
- 745 23. Cohan, F.M.: Sexual isolation and speciation in bacteria. In: blaiaaaaaa (ed.) *Genetics of Mate Choice: From*  
746 *Sexual Selection to Sexual Isolation*, pp. 359–370. Springer, Dordrecht (2002)
- 747 24. Zawadzki, P., Roberts, M.S., Cohan, F.M.: The log-linear relationship between sexual isolation and sequence  
748 divergence in bacillus transformation is robust. *Genetics* **140**(3), 917–932 (1995)
- 749 25. de Visser, A., Rozen, D.E.: Clonal interference and the periodic selection of new beneficial mutations in  
750 *escherichia coli*. *Genetics* (2006)
- 751 26. Shapiro, B.J., Friedman, J., Cordero, O.X., Preheim, S.P., Timberlake, S.C., Szabó, G., Polz, M.F., Alm, E.J.:  
752 Population genomics of early events in the ecological differentiation of bacteria. *science* **336**(6077), 48–51  
753 (2012)
- 754 27. Rogel, M.A., Ormeno-Orrillo, E., Romero, E.M.: Symbiovars in rhizobia reflect bacterial adaptation to  
755 legumes. *Systematic and Applied Microbiology* **34**(2), 96–104 (2011)



- 756 28. Remigi, P., Zhu, J., Young, J.P.W., Masson-Boivin, C.: Symbiosis within symbiosis: evolving nitrogen-fixing  
757 legume symbionts. *Trends in microbiology* **24**(1), 63–75 (2016)
- 758 29. Andrews, M., De Meyer, S., James, E., Stepkowski, T., Hodge, S., Simon, M., Young, J.: Horizontal transfer  
759 of symbiosis genes within and between rhizobial genera: occurrence and importance. *Genes* **9**(7), 321 (2018)
- 760 30. Segovia, L., Young, J.P.W., Martínez-Romero, E.: Reclassification of american rhizobium leguminosarum  
761 biovar phaseoli type i strains as rhizobium etli sp. nov. *International Journal of Systematic and Evolutionary*  
762 *Microbiology* **43**(2), 374–377 (1993)
- 763 31. Haukka, K., Lindström, K., Young, J.P.W.: Three phylogenetic groups of noda and nifh genes in sinorhizobium  
764 and mesorhizobium isolates from leguminous trees growing in africa and latin america. *Applied and*  
765 *Environmental Microbiology* **64**(2), 419–426 (1998)
- 766 32. Laguerre, G., Nour, S.M., Macheret, V., Sanjuan, J., Drouin, P., Amarger, N.: Classification of rhizobia based  
767 on nodC and nifH gene analysis reveals a close phylogenetic relationship among phaseolus vulgaris symbionts.  
768 *Microbiology* **147**(4), 981–993 (2001)
- 769 33. Pérez Carrascal, O.M., VanInsberghe, D., Juárez, S., Polz, M.F., Vinuesa, P., González, V.: Population  
770 genomics of the symbiotic plasmids of sympatric nitrogen-fixing rhizobium species associated with phaseolus  
771 vulgaris. *Environmental microbiology* **18**(8), 2660–2676 (2016)
- 772 34. Sullivan, J.T., Patrick, H.N., Lowther, W.L., Scott, D.B., Ronson, C.W.: Nodulating strains of rhizobium loti  
773 arise through chromosomal symbiotic gene transfer in the environment. *Proceedings of the National Academy*  
774 *of Sciences* **92**(19), 8985–8989 (1995)
- 775 35. Nandasena, K.G., O'Hara, G.W., Tiwari, R.P., Howieson, J.G.: Rapid in situ evolution of nodulating strains for  
776 biserrula plectinica l. through lateral transfer of a symbiosis island from the original mesorhizobial inoculant.  
777 *Applied and environmental microbiology* **72**(11), 7365–7367 (2006)
- 778 36. Friesen, M.L.: Widespread fitness alignment in the legume-rhizobium symbiosis. *New Phytologist* **194**(4),  
779 1096–1111 (2012)
- 780 37. Harrison, P.W., Lower, R.P., Kim, N.K., Young, J.P.W.: Introducing the bacterial 'chromid': not a  
781 chromosome, not a plasmid. *Trends in microbiology* **18**(4), 141–148 (2010)
- 782 38. Kumar, N., Lad, G., Giuntini, E., Kaye, M.E., Udomwong, P., Shamsani, N.J., Young, J.P.W., Bailly, X.:  
783 Bacterial genospecies that are not ecologically coherent: population genomics of rhizobium leguminosarum.  
784 *Open biology* **5**(1) (2015)
- 785 39. Clark, A., Zheng, Y.: Dynamics of linkage disequilibrium in bacterial genomes undergoing transformation  
786 and/or conjugation. *Journal of Evolutionary Biology* **10**(4), 663–676 (1997)
- 787 40. Wetzel, M.E., Olsen, G.J., Chakravarty, V., Farrand, S.K.: The repabc plasmids with quorum-regulated  
788 transfer systems in members of the rhizobiales divide into two structurally and separately evolving groups.  
789 *Genome biology and evolution* **7**(12), 3337–3357 (2015)
- 790 41. Parker, M.A.: Legumes select symbiosis island sequence variants in bradyrhizobium. *Molecular ecology* **21**(7),  
791 1769–1778 (2012)
- 792 42. Freiberg, C., Fellay, R., Bairoch, A., Broughton, W.J., Rosenthal, A., Perret, X.: Molecular basis of symbiosis  
793 between rhizobium and legumes. *Nature* **387**(6631), 394 (1997)
- 794 43. Guillot, G., Rousset, F.: Dismantling the mantel tests. *Methods in Ecology and Evolution* **4**(4), 336–344  
795 (2013)
- 796 44. Harmon, L.J., Glor, R.E.: Poor statistical performance of the mantel test in phylogenetic comparative  
797 analyses. *Evolution: International Journal of Organic Evolution* **64**(7), 2173–2178 (2010)
- 798 45. Perez-Mendoza, D., Domínguez-Ferreras, A., Muñoz, S., Soto, M.J., Olivares, J., Brom, S., Girard, L.,  
799 Herrera-Cervera, J.A., Sanjuán, J.: Identification of functional mob regions in rhizobium etli: evidence for  
800 self-transmissibility of the symbiotic plasmid pRetCFN42d. *Journal of bacteriology* **186**(17), 5753–5761 (2004)
- 801 46. von Bodman, S.B., McCutchan, J., Farrand, S.K.: Characterization of conjugal transfer functions of  
802 agrobacterium tumefaciens ti plasmid pTic58. *Journal of bacteriology* **171**(10), 5281–5289 (1989)
- 803 47. Chen, L., Chen, Y., Wood, D.W., Nester, E.W.: A new type iv secretion system promotes conjugal transfer in  
804 agrobacterium tumefaciens. *Journal of bacteriology* **184**(17), 4838–4845 (2002)
- 805 48. Masuda, H., Inouye, M.: Toxins of prokaryotic toxin-antitoxin systems with sequence-specific endoribonuclease  
806 activity. *Toxins* **9**(4), 140 (2017)

- 807 49. Lepiae, R., Geeraerts, D., Hallez, R., Guglielmini, J., Dreze, P., Van Melderen, L.: Diversity of bacterial type ii  
808 toxin-antitoxin systems: a comprehensive search and functional analysis of novel families. *Nucleic acids*  
809 *research* **39**(13), 5513–5525 (2011)
- 810 50. Novick, R.P., Christie, G.E., Penadés, J.R.: The phage-related chromosomal islands of gram-positive bacteria.  
811 *Nature Reviews Microbiology* **8**(8), 541 (2010)
- 812 51. Wendling, C.C., Goehlich, H., Roth, O.: The structure of temperate phage-bacteria infection networks  
813 changes with the phylogenetic distance of the host bacteria. *Biology letters* **14**(11), 20180320 (2018)
- 814 52. Zhou, Y., Liang, Y., Lynch, K.H., Dennis, J.J., Wishart, D.S.: Phast: a fast phage search tool. *Nucleic acids*  
815 *research* **39**(suppl.2), 347–352 (2011)
- 816 53. Arndt, D., Grant, J.R., Marcu, A., Sajed, T., Pon, A., Liang, Y., Wishart, D.S.: Phaster: a better, faster  
817 version of the phast phage search tool. *Nucleic acids research* **44**(W1), 16–21 (2016)
- 818 54. Isidro, A., Henriques, A.O., Tavares, P.: The portal protein plays essential roles at different steps of the spp1  
819 dna packaging process. *Virology* **322**(2), 253–263 (2004)
- 820 55. Hirsch, P., Van Montagu, M., Johnston, A., Brewin, N., Schell, J.: Physical identification of bacteriocinogenic,  
821 nodulation and other plasmids in strains of rhizobium leguminosarm. *Microbiology* **120**(2), 403–412 (1980)
- 822 56. Lemaire, B., Dlodlo, O., Chimphango, S., Stirton, C., Schrire, B., Boatwright, S., Honnay, O., Smets, E.,  
823 Sprent, J., James, E., *et al.*: Symbiotic diversity, specificity and distribution of rhizobia in native legumes of  
824 the core cape subregion (south africa). *FEMS microbiology ecology* **91**, 2–17 (2015)
- 825 57. Provorov, N., Andronov, E., Onishchuk, O.: Forms of natural selection controlling the genomic evolution in  
826 nodule bacteria. *Russian Journal of Genetics* **53**(4), 411–419 (2017)
- 827 58. Cervantes, L., Bustos, P., Girard, L., Santamaría, R.I., Dávila, G., Vinuesa, P., Romero, D., Brom, S.: The  
828 conjugative plasmid of a bean-nodulating sinorhizobium fredii strain is assembled from sequences of two  
829 rhizobium plasmids and the chromosome of a sinorhizobium strain. *BMC microbiology* **11**(1), 149 (2011)
- 830 59. Li, X., Tong, W., Wang, L., Rahman, S.U., Wei, G., Tao, S.: A novel strategy for detecting recent horizontal  
831 gene transfer and its application to rhizobium strains. *Frontiers in Microbiology* **9**, 973 (2018).  
832 doi:10.3389/fmicb.2018.00973
- 833 60. Sullivan, J.T., Trzebiatowski, J.R., Cruickshank, R.W., Guzy, J., Brown, S.D., Elliot, R.M., Fleetwood, D.J.,  
834 McCallum, N.G., Rossbach, U., Stuart, G.S., *et al.*: Comparative sequence analysis of the symbiosis island of  
835 mesorhizobium loti strain r7a. *Journal of bacteriology* **184**(11), 3086–3095 (2002)
- 836 61. Ling, J., Wang, H., Wu, P., Li, T., Tang, Y., Naseer, N., Zheng, H., Masson-Boivin, C., Zhong, Z., Zhu, J.:  
837 Plant nodulation inducers enhance horizontal gene transfer of azorhizobium caulinodans symbiosis island.  
838 *Proceedings of the National Academy of Sciences* **113**(48), 13875–13880 (2016)
- 839 62. Bailly, X., Olivieri, I., Brunel, B., Cleyet-Marel, J.-C., Béna, G.: Horizontal gene transfer and homologous  
840 recombination drive the evolution of the nitrogen-fixing symbionts of medicago species. *Journal of*  
841 *bacteriology* **189**(14), 5223–5236 (2007)
- 842 63. Klinger, C.R., Lau, J.A., Heath, K.D.: Ecological genomics of mutualism decline in nitrogen-fixing bacteria.  
843 *Proc. R. Soc. B* **283**(1826), 20152563 (2016)
- 844 64. Falush, D., Torpdahl, M., Didelot, X., Conrad, D.F., Wilson, D.J., Achtman, M.: Mismatch induced speciation  
845 in salmonella: model and data. *Philosophical Transactions of the Royal Society of London B: Biological*  
846 *Sciences* **361**(1475), 2045–2053 (2006)
- 847 65. Rocha, E.P.: The organization of the bacterial genome. *Annual review of genetics* **42**, 211–233 (2008)
- 848 66. Bohlin, J., Eldholm, V., Pettersson, J.H., Brynildsrud, O., Snipen, L.: The nucleotide composition of microbial  
849 genomes indicates differential patterns of selection on core and accessory genomes. *BMC genomics* **18**(1), 151  
850 (2017)
- 851 67. Reeve, W., O'Hara, G., Chain, P., Ardley, J., Bräu, L., Nandesena, K., Tiwari, R., Malfatti, S., Kiss, H.,  
852 Lapidus, A., *et al.*: Complete genome sequence of rhizobium leguminosarum bv trifolii strain wsm2304, an  
853 effective microsymbiont of the south american clover trifolium polymorphum. *Standards in genomic sciences*  
854 **2**(1), 66 (2010)
- 855 68. Servín-Garcidueñas, L.E., Rogel, M.A., Ormeño-Orrillo, E., Delgado-Salinas, A., Martínez-Romero, J.,  
856 Sánchez, F., Martínez-Romero, E.: Genome sequence of rhizobium sp. strain ccge510, a symbiont isolated from  
857 nodules of the endangered wild bean phaseolus albescens. *Journal of bacteriology* **194**(22), 6310–6311 (2012)

- 858 69. Silva, C., Vinuesa, P., Eguiarte, L.E., Martínez-Romero, E., Souza, V.: Rhizobium etli and rhizobium gallicum  
859 nodulate common bean (phaseolus vulgaris) in a traditionally managed milpa plot in mexico: population  
860 genetics and biogeographic implications. Applied and environmental microbiology **69**(2), 884–893 (2003)
- 861 70. Jeong, H., Sung, S., Kwon, T., Seo, M., Caetano-Anollés, K., Choi, S.H., Cho, S., Nasir, A., Kim, H.: Hgtree:  
862 database of horizontally transferred genes determined by tree reconciliation. Nucleic acids research **44**(D1),  
863 610–619 (2015)
- 864 71. Beiko, R.G., Harlow, T.J., Ragan, M.A.: Highways of gene sharing in prokaryotes. Proceedings of the National  
865 Academy of Sciences **102**(40), 14332–14337 (2005)
- 866 72. Gophna, U., Ron, E.Z., Graur, D.: Bacterial type iii secretion systems are ancient and evolved by multiple  
867 horizontal-transfer events. Gene **312**, 151–163 (2003)
- 868 73. Lawrence, J.G., Ochman, H.: Reconciling the many faces of lateral gene transfer. Trends in microbiology  
869 **10**(1), 1–4 (2002)
- 870 74. Azad, R.K., Lawrence, J.G.: Detecting laterally transferred genes: use of entropic clustering methods and  
871 genome position. Nucleic acids research **35**(14), 4629–4639 (2007)
- 872 75. van Passel, M.W., Bart, A., Thygesen, H.H., Luyf, A.C., van Kampen, A.H., van der Ende, A.: An acquisition  
873 account of genomic islands based on genome signature comparisons. BMC genomics **6**(1), 163 (2005)
- 874 76. Ravenhall, M., Škunca, N., Lassalle, F., Dessimoz, C.: Inferring horizontal gene transfer. PLoS computational  
875 biology **11**(5), 1004095 (2015)
- 876 77. Lawrence, J.G., Ochman, H.: Amelioration of bacterial genomes: rates of change and exchange. Journal of  
877 molecular evolution **44**(4), 383–397 (1997)
- 878 78. Becq, J., Churlaud, C., Deschavanne, P.: A benchmark of parametric methods for horizontal transfers  
879 detection. PLoS One **5**(4), 9989 (2010)
- 880 79. Alt-Mörbe, J., Stryker, J.L., Fuqua, C., Li, P.-L., Farrand, S.K., Winans, S.C.: The conjugal transfer system of  
881 agrobacterium tumefaciens octopine-type ti plasmids is closely related to the transfer system of an incp  
882 plasmid and distantly related to ti plasmid vir genes. Journal of bacteriology **178**(14), 4248–4257 (1996)
- 883 80. Galibert, F., Finan, T.M., Long, S.R., Pühler, A., Abola, P., Ampe, F., Barloy-Hubler, F., Barnett, M.J.,  
884 Becker, A., Boistard, P., *et al.*: The composite genome of the legume symbiont sinorhizobium meliloti. Science  
885 **293**(5530), 668–672 (2001)
- 886 81. Barnett, M.J., Fisher, R.F., Jones, T., Komp, C., Abola, A.P., Barloy-Hubler, F., Bowser, L., Capela, D.,  
887 Galibert, F., Gouzy, J., *et al.*: Nucleotide sequence and predicted functions of the entire sinorhizobium meliloti  
888 psyma megaplasmid. Proceedings of the National Academy of Sciences **98**(17), 9883–9888 (2001)
- 889 82. Schulein, R., Dehio, C.: The virb/vird4 type iv secretion system of bartonella is essential for establishing  
890 intraerythrocytic infection. Molecular microbiology **46**(4), 1053–1067 (2002)
- 891 83. Zhao, R., Liu, L.X., Zhang, Y.Z., Jiao, J., Cui, W.J., Zhang, B., Wang, X.L., Li, M.L., Chen, Y., Xiong, Z.Q.,  
892 *et al.*: Adaptive evolution of rhizobial symbiotic compatibility mediated by co-evolved insertion sequences. The  
893 ISME journal **12**(1), 101 (2017)
- 894 84. Rosini, R., Rinaudo, C.D., Soriani, M., Lauer, P., Mora, M., Maione, D., Taddei, A., Santi, I., Ghezzi, C.,  
895 Brettoni, C., *et al.*: Identification of novel genomic islands coding for antigenic pilus-like structures in  
896 streptococcus agalactiae. Molecular microbiology **61**(1), 126–141 (2006)
- 897 85. Merkl, R.: Sigi: score-based identification of genomic islands. BMC bioinformatics **5**(1), 22 (2004)
- 898 86. Heidelberg, J.F., Eisen, J.A., Nelson, W.C., Clayton, R.A., Gwinn, M.L., Dodson, R.J., Haft, D.H., Hickey,  
899 E.K., Peterson, J.D., Umayam, L., *et al.*: Dna sequence of both chromosomes of the cholera pathogen vibrio  
900 cholerae. Nature **406**(6795), 477 (2000)
- 901 87. Engelberg-Kulka, H., Amitai, S., Kolodkin-Gal, I., Hazan, R.: Bacterial programmed cell death and  
902 multicellular behavior in bacteria. PLoS genetics **2**(10), 135 (2006)
- 903 88. Van Melder, L., De Bast, M.S.: Bacterial toxin–antitoxin systems: more than selfish entities? PLoS genetics  
904 **5**(3), 1000437 (2009)
- 905 89. Hayes, C.S., Sauer, R.T.: Toxin-antitoxin pairs in bacteria: killers or stress regulators? Cell **112**(1), 2–4 (2003)
- 906 90. Rowe-Magnus, D.A., Guerout, A.-M., Biskri, L., Bouige, P., Mazel, D.: Comparative analysis of superintegrons:  
907 engineering extensive genetic diversity in the vibronaceae. Genome research **13**(3), 428–442 (2003)
- 908 91. Davies, E.V., James, C.E., Williams, D., O'Brien, S., Fothergill, J.L., Haldenby, S., Paterson, S., Winstanley,

- 909 C., Brockhurst, M.A.: Temperate phages both mediate and drive adaptive evolution in pathogen biofilms.  
910 Proceedings of the National Academy of Sciences **113**(29), 8266–8271 (2016)
- 911 92. Volkova, V.V., Lu, Z., Besser, T., Gröhn, Y.T.: Modeling infection dynamics of bacteriophages in enteric  
912 *Escherichia coli*: estimating the contribution of transduction to antimicrobial gene spread. Applied and  
913 environmental microbiology, 00446 (2014)
- 914 93. Chen, J., Quiles-Puchalt, N., Chiang, Y.N., Bacigalupe, R., Fillol-Salom, A., Chee, M.S.J., Fitzgerald, J.R.,  
915 Penadés, J.R.: Genome hypermobility by lateral transduction. Science **362**(6411), 207–212 (2018)
- 916 94. Van Cauwenberghe, J., Verstraete, B., Lemaire, B., Lievens, B., Michiels, J., Honnay, O.: Population structure  
917 of root nodulating rhizobium leguminosarum in vicia cracca populations at local to regional geographic scales.  
918 Systematic and applied microbiology **37**(8), 613–621 (2014)
- 919 95. Bailly, X., Olivieri, I., De Mita, S., CLEYET-MAREL, J.-C., Béna, G.: Recombination and selection shape the  
920 molecular diversity pattern of nitrogen-fixing sinorhizobium sp. associated to medicago. Molecular Ecology  
921 **15**(10), 2719–2734 (2006)
- 922 96. Bailly, X., Giuntini, E., Sexton, M.C., Lower, R.P., Harrison, P.W., Kumar, N., Young, J.P.W.: Population  
923 genomics of sinorhizobium medicae based on low-coverage sequencing of sympatric isolates. The ISME  
924 Journal **5**(11), 1722 (2011)
- 925 97. Microbes NG Service. <https://microbesng.uk/>
- 926 98. Bankevich, A., Nurk, S., Antipov, D., Gurevich, A.A., Dvorkin, M., Kulikov, A.S., Lesin, V.M., Nikolenko, S.I.,  
927 Pham, S., Pribelski, A.D., *et al.*: Spades: a new genome assembly algorithm and its applications to single-cell  
928 sequencing. Journal of computational biology **19**(5), 455–477 (2012)
- 929 99. Github Repository of Jigome. <https://github.com/jpwyong/genomics>
- 930 100. Gurevich, A., Saveliev, V., Vyahhi, N., Tesler, G.: Quast: quality assessment tool for genome assemblies.  
931 Bioinformatics **29**(8), 1072–1075 (2013)
- 932 101. Seemann, T.: Prokka: rapid prokaryotic genome annotation. Bioinformatics **30**(14), 2068–2069 (2014)
- 933 102. Lechner, M., Findeiß, S., Steiner, L., Marz, M., Stadler, P.F., Prohaska, S.J.: Proteinortho: detection of (co-)  
934 orthologs in large-scale analysis. BMC bioinformatics **12**(1), 124 (2011)
- 935 103. Github Repository of Syntenizer 3000. <https://github.com/kamiboy/Syntenizer3000/>
- 936 104. Lechner, M., Hernandez-Rosales, M., Doerr, D., Wieseke, N., Thévenin, A., Stoye, J., Hartmann, R.K.,  
937 Prohaska, S.J., Stadler, P.F.: Orthology detection combining clustering and synteny for very large datasets.  
938 PLoS One **9**(8), 105015 (2014)
- 939 105. Sievers, F., Wilm, A., Dineen, D., Gibson, T.J., Karplus, K., Li, W., Lopez, R., McWilliam, H., Remmert, M.,  
940 Söding, J., *et al.*: Fast, scalable generation of high-quality protein multiple sequence alignments using clustal  
941 omega. Molecular systems biology **7**(1), 539 (2011)
- 942 106. Needleman, S.B., Wunsch, C.D.: A general method applicable to the search for similarities in the amino acid  
943 sequence of two proteins. Journal of molecular biology **48**(3), 443–453 (1970)
- 944 107. Github Repository for Rhizobium Analysis. [https://github.com/izabelcavassim/Rhizobium\\_analysis](https://github.com/izabelcavassim/Rhizobium_analysis)
- 945 108. VanRaden, P.M.: Efficient methods to compute genomic predictions. Journal of dairy science **91**(11),  
946 4414–4423 (2008)
- 947 109. Sukumaran, J., Holder, M.T.: Dendropy: a python library for phylogenetic computing. Bioinformatics **26**(12),  
948 1569–1571 (2010)
- 949 110. Long, Q., Rabanal, F.A., Meng, D., Huber, C.D., Farlow, A., Platzer, A., Zhang, Q., Vilhjálmsson, B.J.,  
950 Korte, A., Nizhynska, V., *et al.*: Massive genomic variation and strong selection in arabidopsis thaliana lines  
951 from sweden. Nature genetics **45**(8), 884 (2013)
- 952 111. Simonsen, M., Pedersen, C.N.: Rapid computation of distance estimators from nucleotide and amino acid  
953 alignments. In: Proceedings of the 2011 ACM Symposium on Applied Computing, pp. 89–93 (2011). ACM

954 **Figures**

**Figure 1 Genetic divergence across 196 rhizobium strains.** Pairwise comparisons of genetic diversity were analyzed at three different levels. **(a)** Proportion of shared single nucleotide polymorphisms (SNPs) in genes that were present in at least 100 strains and that passed filtering criteria (6,529 genes, 441,287 SNPs). Clusters of strains with SNP identity above 96% were recognised as 5 genospecies: gsA (blue), gsB (salmon), gsC (green), gsD (purple), gsE (pink) as indicated in the legend. **(b)** Average nucleotide identity for concatenated sequences of 282 housekeeping genes. **(c)** Number of shared genes. Strains were ordered by clustering of the SNP data. Strain origins are indicated by coloured bars at the left (DKO in red, DK in purple, F in yellow, and UK in green). **(d)** Histogram showing the distribution of shared genes across strains, with a total of 22,115 orthologous genes. **(e)** Principal component analysis (PCA) of the covariance matrix based on the allelic variation of 6,529 genes that were present in at least 100 strains (see Methods). The colours correspond to the genospecies and the shapes to the origin of the sample. PC1 and PC2. **(f)** PC3 and PC4 of the PCA.

**Figure 2 Accessory and core genome.** **(a)** Matrix of the presence (dark) and absence (light) of all 22,115 orthologous gene groups. Strains (y-axis) are clustered by similarity as in Fig. 1a, and genes (x-axis) are clustered by similarity in distribution. **(b)** Venn diagram of the shared orthologous genes across the 5 genospecies; the outermost numbers represent the number of genes that are private to the genospecies. **(c)** GC3 content distribution across accessory and core genes; dashed lines represent the median GC3 of each category.

**Figure 3 Population genetic characteristics of the genospecies.** **(a)** Nucleotide diversity of core and accessory genes on the chromosome and the chromids (Rh01 and Rh02). **(b)** Tajima's D distribution for each replicon. Both statistics (nucleotide diversity and Tajima's D) were computed within genospecies and only genes present in all genospecies are shown. **(c)** Site frequency spectrum of each of the three largest genospecies. **(d)** Intra-genic Linkage Disequilibrium (LD) decay for these genospecies.

**Figure 4 Distribution of plasmid types and evidence of Sym-plasmid introgression through conjugation.** **(a)** The distribution of plasmid groups, which were defined based on the genetic similarity of the RepA plasmid partitioning protein. **(b)** Phylogenetic analysis of the *repA* gene of plasmid type Rh08. DKO represents strains sampled from Danish organic fields, DK from Danish conventional trials. A complete set of conjugal transfer genes has the following genes upstream of *repA*: *traI, trbBCDEJKLFGHI, traRMHBFACDG*, with the origin of transfer (*oriT*) between *traA* and *traC*. Partial sets are broken by the end of the scaffold, mostly after *traM*.

**Figure 5 Different intensities of LD between compartments and evidence of HGT. (a)**

Intergenic LD was calculated for each genomic compartment of strain SM3 (578, 468, 249, 228, 133 genes are present in plasmids Rh01 Rh02, Rh03, Rh05 and Rh07 respectively). The mean intergenic  $r^2$  is: Rh01=0.11; Rh02=0.15; Rh03=0.11; Rh05=0.14; Rh07=0.15. The colors reflect the pairwise correlation between genes, red patches reveal linkage blocks. **(b)** Intergenic LD across genes of the sym plasmid. **(c)** Strong linkage blocks comprising the symbiosis genes (sorted by physical position).

**Figure 6 Evidence of horizontal gene transfer between genospecies. (a)** Species phylogeny

based on a concatenation of 282 core genes using the neighbor-joining method. Bootstrap values are shown only for the branches separating the genospecies. **(b)-(d)** Examples of symbiosis gene phylogenies, with insets showing clades in which identical alleles are shared across genospecies.

**Figure 7 Incongruent genes across compartments. (a)** Distribution of discordance scores based

on genes present in at least 2 genospecies (13,843). **(b)** Distribution of discordance score in genes present in the strain SM3 (5,920 orthologous genes). Only genes that had at least 18 segregating sites and nucleotide diversity < 0.25 were plotted.

**Figure 8 Functionality of chromosomal islands. (a)** Gene organization of the *avhB/tra* type IV

secretion system from SM3. **(b)** Distribution of discordance scores for cluster 1. Coloured bars above the chart represent the classification of gene groups found in the area. **(c)** Illustration of synteny between gene groups in cluster 1 for strains lacking an insert (SM4, SM100), with the *avhB/Tra* conjugative system (SM3, SM121B), with a DNA rearrangement gene cluster (SM170C, SM153D), and one strain with both inserts (SM113). Dot plots above the gene group lines represent the discordance score for each gene in the gene group. **(d)** Distribution of discordance scores for cluster 2. Bars above the chart represent the classification of gene groups found in the area.

955 **Tables**

**Table 1** Contrast of average population genetics parameters. Symbiosis gene values in comparison to the average of core genes and accessory genes placed in four different genomic compartments (chromosome, Rh01, Rh02, Rh03).

| Gene type       | Replicon    | GC    | Gene length | Segregating sites | Nucleotide diversity | Pairwise differences | Tajima's D |
|-----------------|-------------|-------|-------------|-------------------|----------------------|----------------------|------------|
| Symbiosis genes | Sym-plasmid | 0.547 | 951.231     | 106.769           | 0.036                | 33.578               | 2.544      |
| Accessory       | Rh01        | 0.577 | 798.334     | 72.807            | 0.025                | 19.813               | 0.08       |
| Accessory       | Rh02        | 0.566 | 756.836     | 78.883            | 0.036                | 26.649               | -0.006     |
| Accessory       | Rh03        | 0.565 | 899.796     | 79.281            | 0.035                | 26.311               | -0.074     |
| Accessory       | Chrm        | 0.567 | 733.634     | 72.686            | 0.04                 | 27.359               | 0.263      |
| Core            | Rh01        | 0.603 | 1076.008    | 200.658           | 0.041                | 42.592               | 0.758      |
| Core            | Rh02        | 0.611 | 1030.538    | 210.462           | 0.039                | 39.76                | 0.309      |
| Core            | Rh03        | 0.604 | 969.504     | 188.023           | 0.038                | 36.431               | 0.424      |
| Core            | Chrm        | 0.607 | 941.889     | 163.674           | 0.038                | 35.574               | 0.818      |
| Core            | All genes   | 0.607 | 961         | 171               | 0.039                | 36.5                 | 0.765      |
| Accessory       | All genes   | 0.568 | 755         | 73.9              | 0.037                | 26.2                 | 0.181      |

956 **Additional Files**

957 Additional file 1 — Supplementary figures

958 Figure S1-2. Map of soil sampling locations; Figure S3. Pacbio assembly stats; Figure S4. Spades and Jigome  
959 assembly; Figure S5. Overall assembly stats; Figure S6. Phylogenetic tree based on *rpoB*; Figure S7. Pan genome  
960 analysis; Figure S8. Population genetics stats; Figure S9. Structural rearrangements between genospecies; Figure  
961 S10. *repA* phylogeny of plasmid Rh07; Figure S11. Phylogenies of *tra* genes of plasmid Rh08; Figure S12-13.  
962 Population structure effects on LD estimates; Figure S14. Species tree; Figure S15. Discordance score scheme;  
963 Figure S16. Chromosomal introgression islands; Figure S17. Introgression mediated by phage; Figure S18.  
964 Discordance score distribution across genomic compartments.

965 Additional file 2 — Excel spreadsheet with multiple data

966 This file is a multi-page table composed of the following information:

- 967 ● Table S1 - Metadata: information on field trials for each isolate.
- 968 ● Table S2 - Genome statistics: information on genome assemblies.
- 969 ● Table S3 - Genes statistics: information on genes and plasmid types for each isolate.
- 970 ● Table S4 - Conserved genes: list of conserved genes used for species tree construction.
- 971 ● Table S5 - Gene counts; GC content and Population genetics for each compartment.
- 972 ● Table S6 - Population genetic parameters: of every orthologous gene.
- 973 ● Table S7 - Symbiosis genes parameters: population genetic parameters of symbiosis genes in contrast to  
974 *recA* and *rpoB*.
- 975 ● Table S8 - Chromosomal islands: features and gene ordering.
- 976 ● Table S9 - Inserts description: configuration of *avhB* in different strains.
- 977 ● Table S10 - Phage diversity: phage ID's, position and sequence for every isolate.
- 978 ● Table S11 - Accession numbers of the 196 genomes.

979 Availability of data and materials

980 The data that support the findings of this study are available in the INSDC databases under Study/BioProject ID  
981 PRJNA510726. Accessions numbers are from SAMN10617942 to SAMN10618137 consecutively and are also  
982 provided in the Additional file 2 - Table S11.

Figure 1

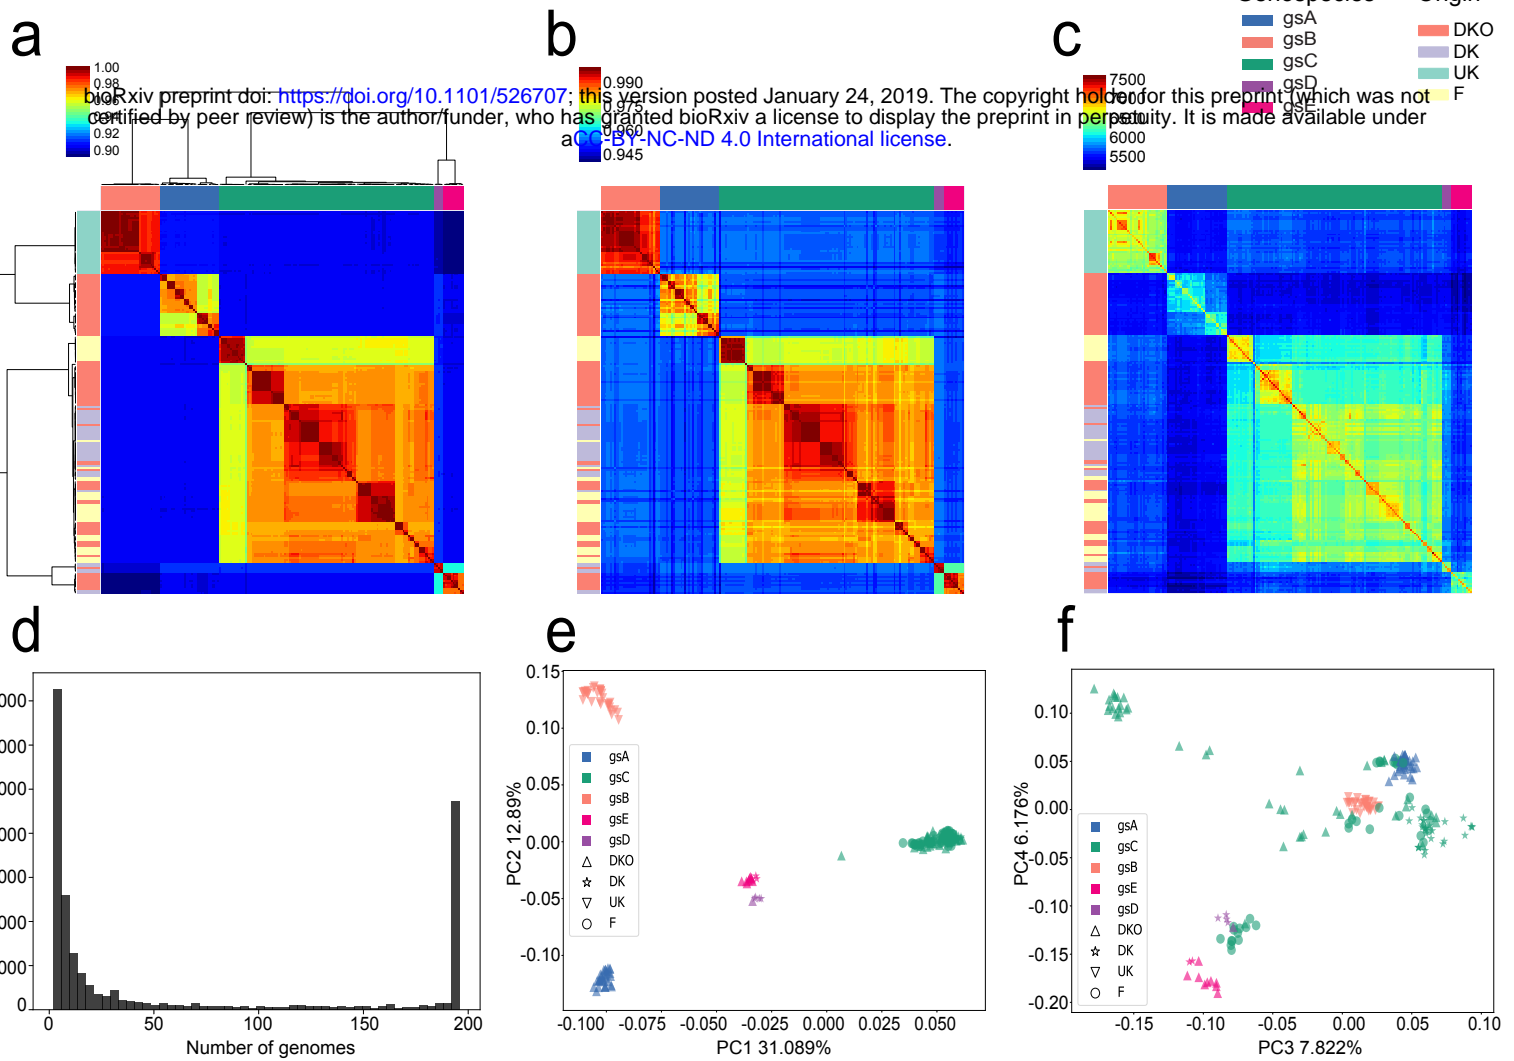



Figure 2

a

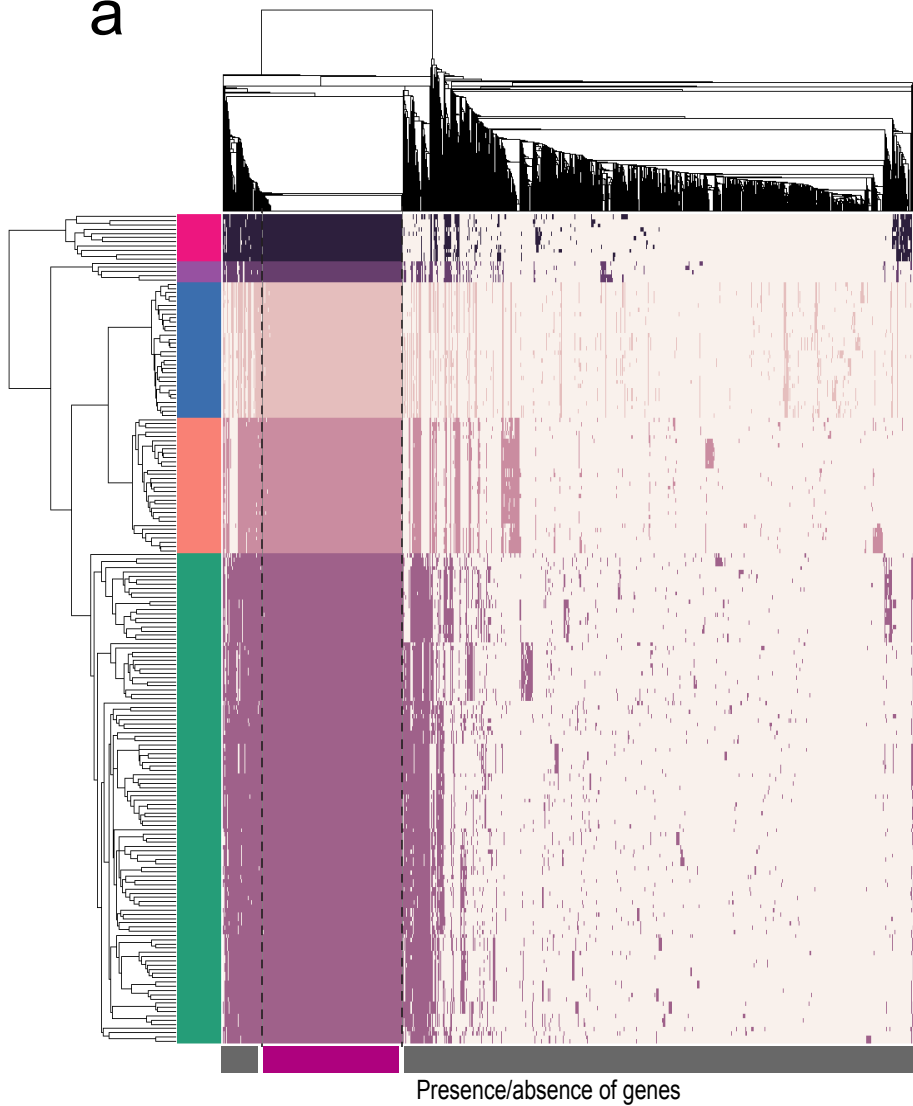

b

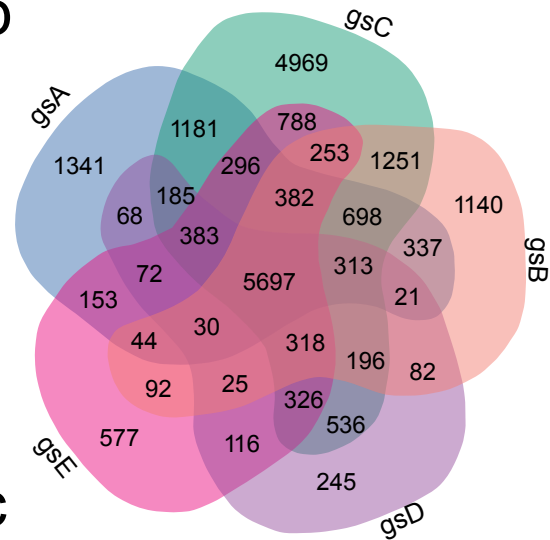

c

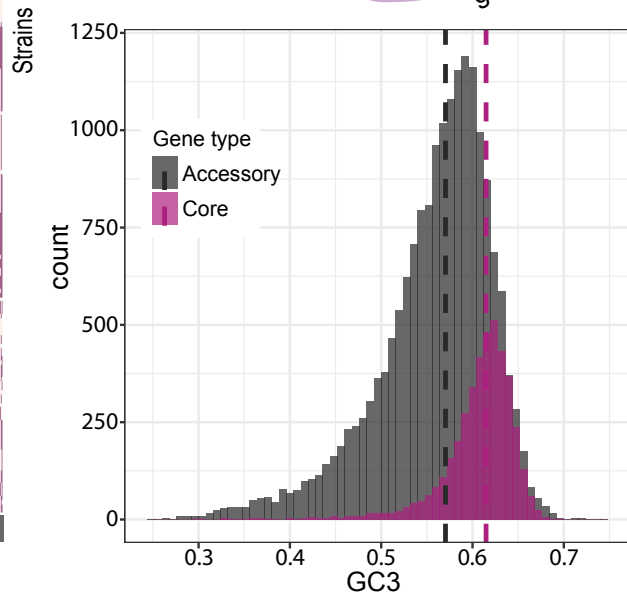

**a** Figure 3

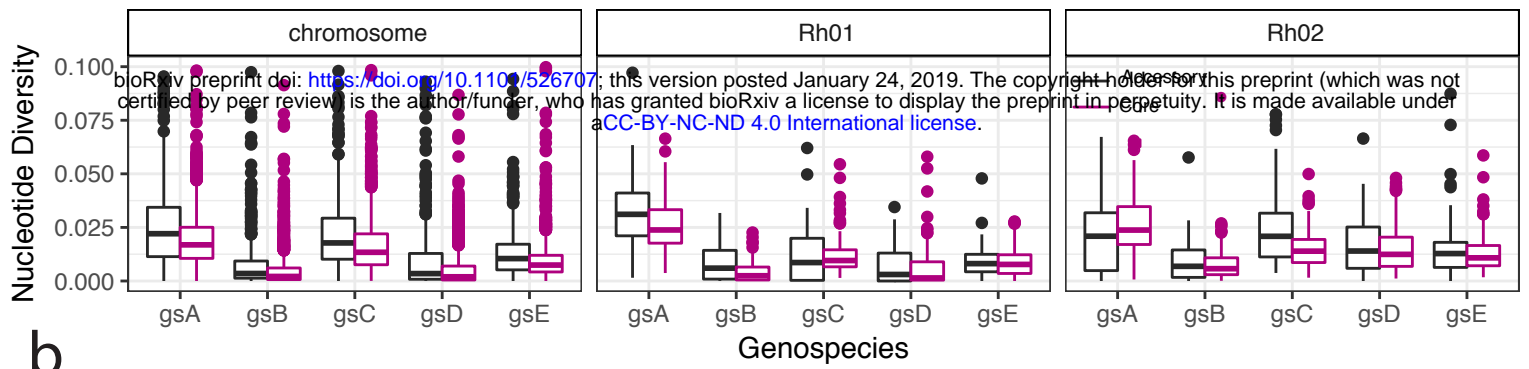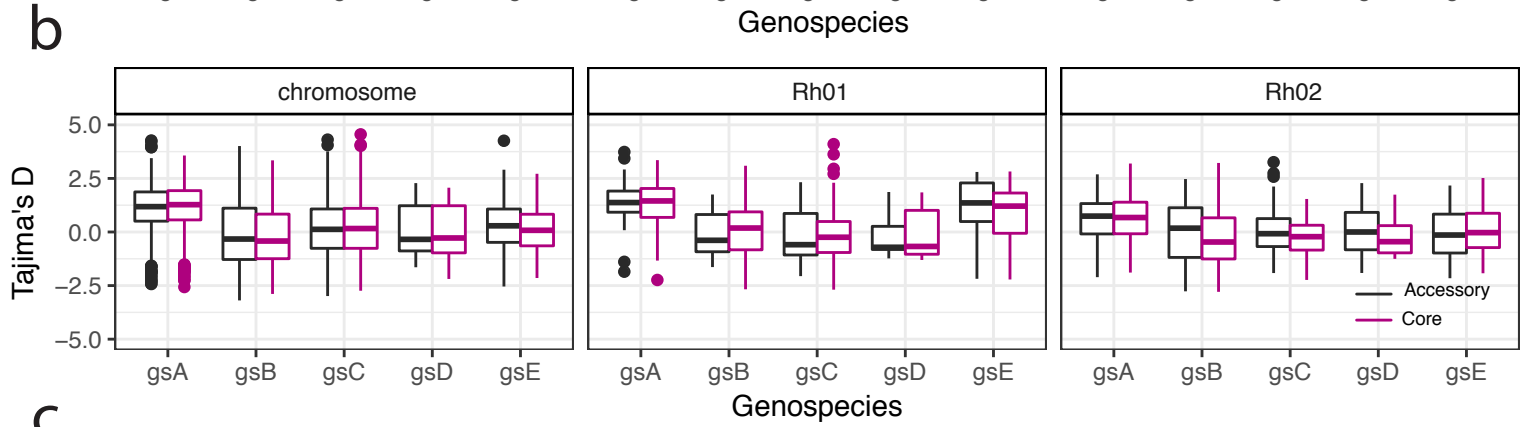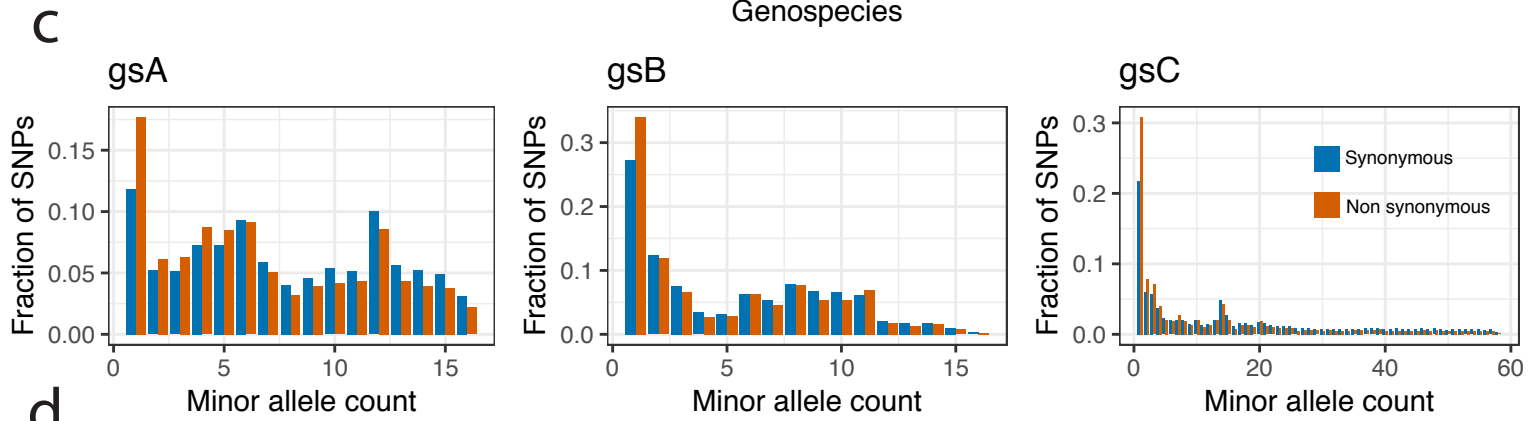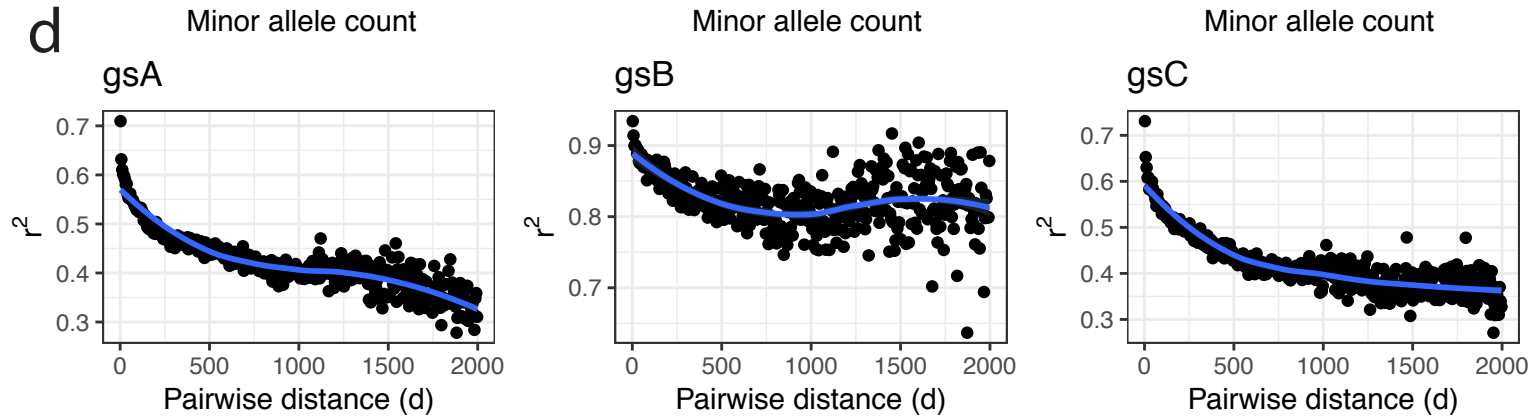

Figure 4

**a**

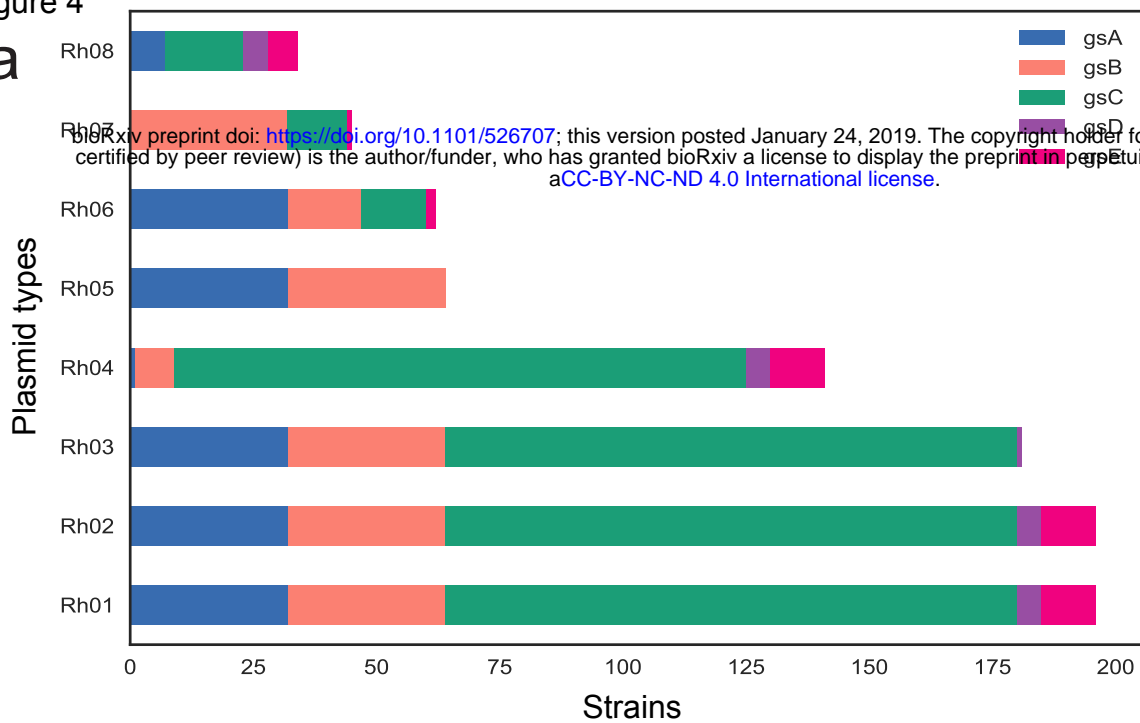

**b**

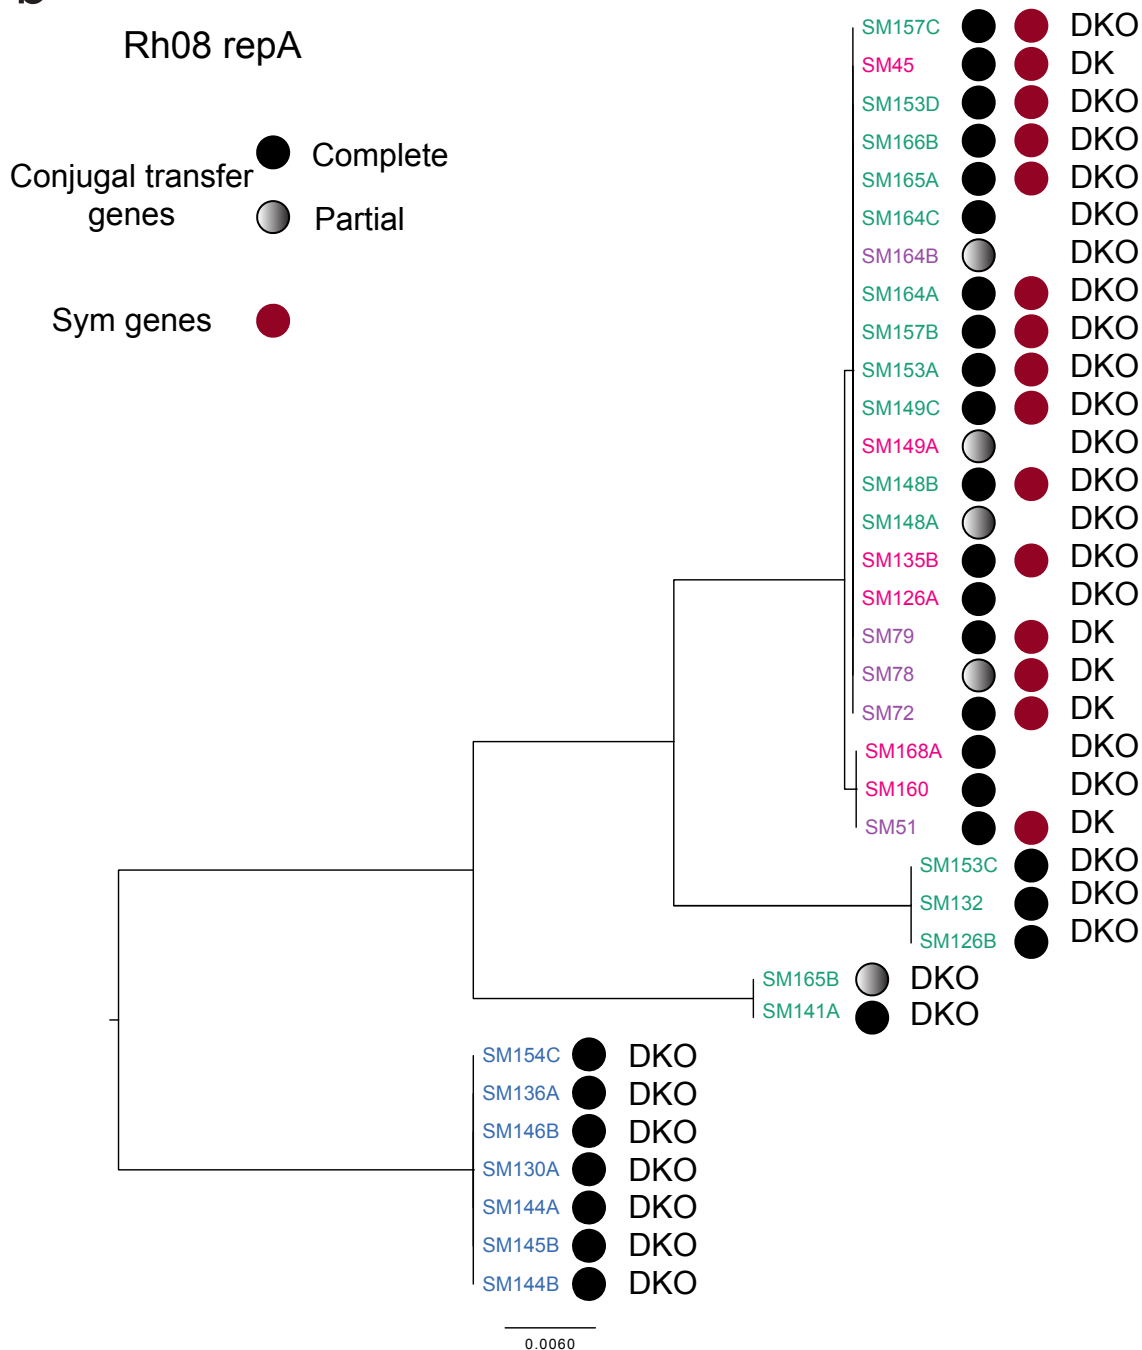

Figure 5

Intergenic correlation

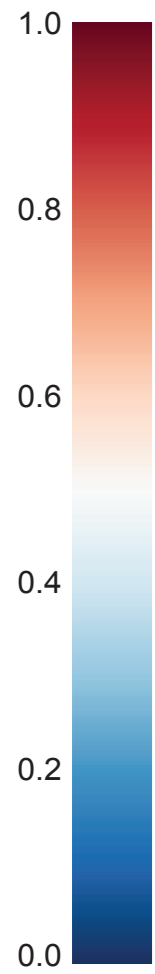

**a**

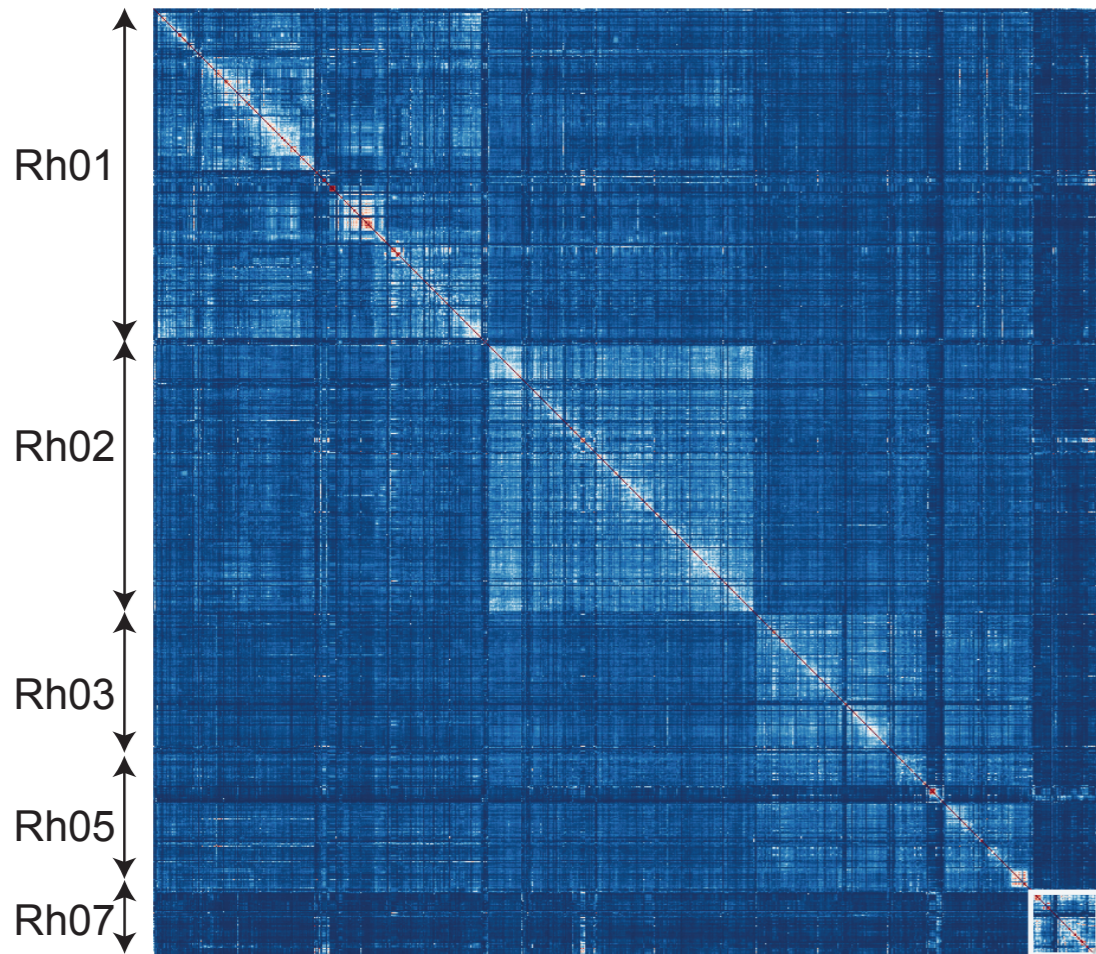

Plasmids

**b**

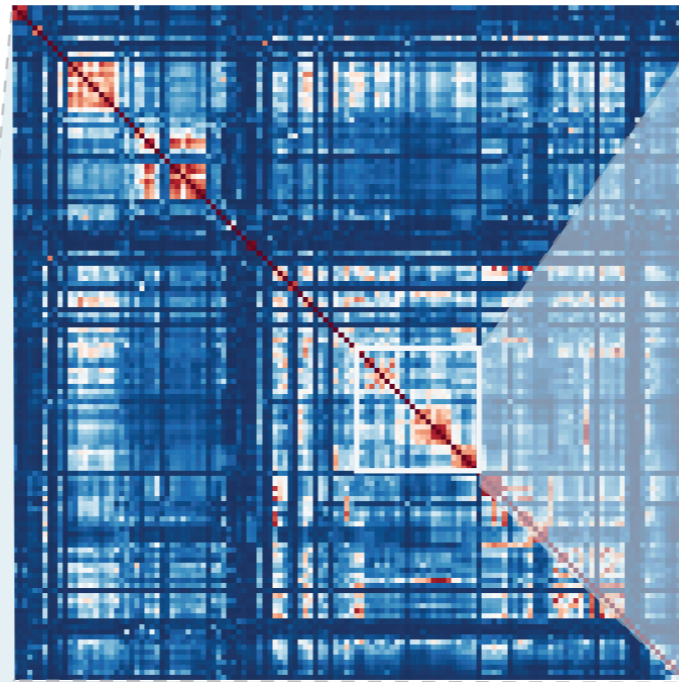

sym-plasmid (Rh07)

**c**

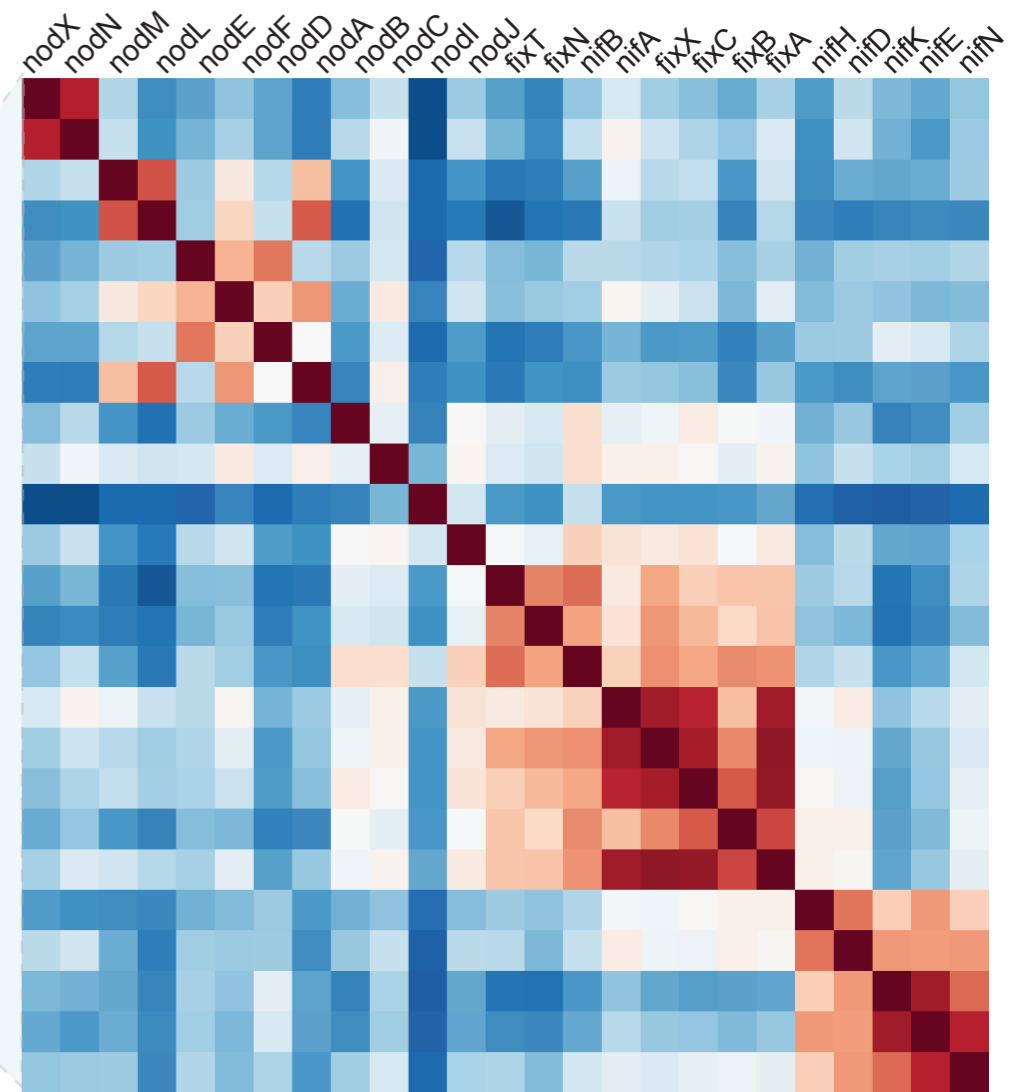

symbiosis genes

Figure 6

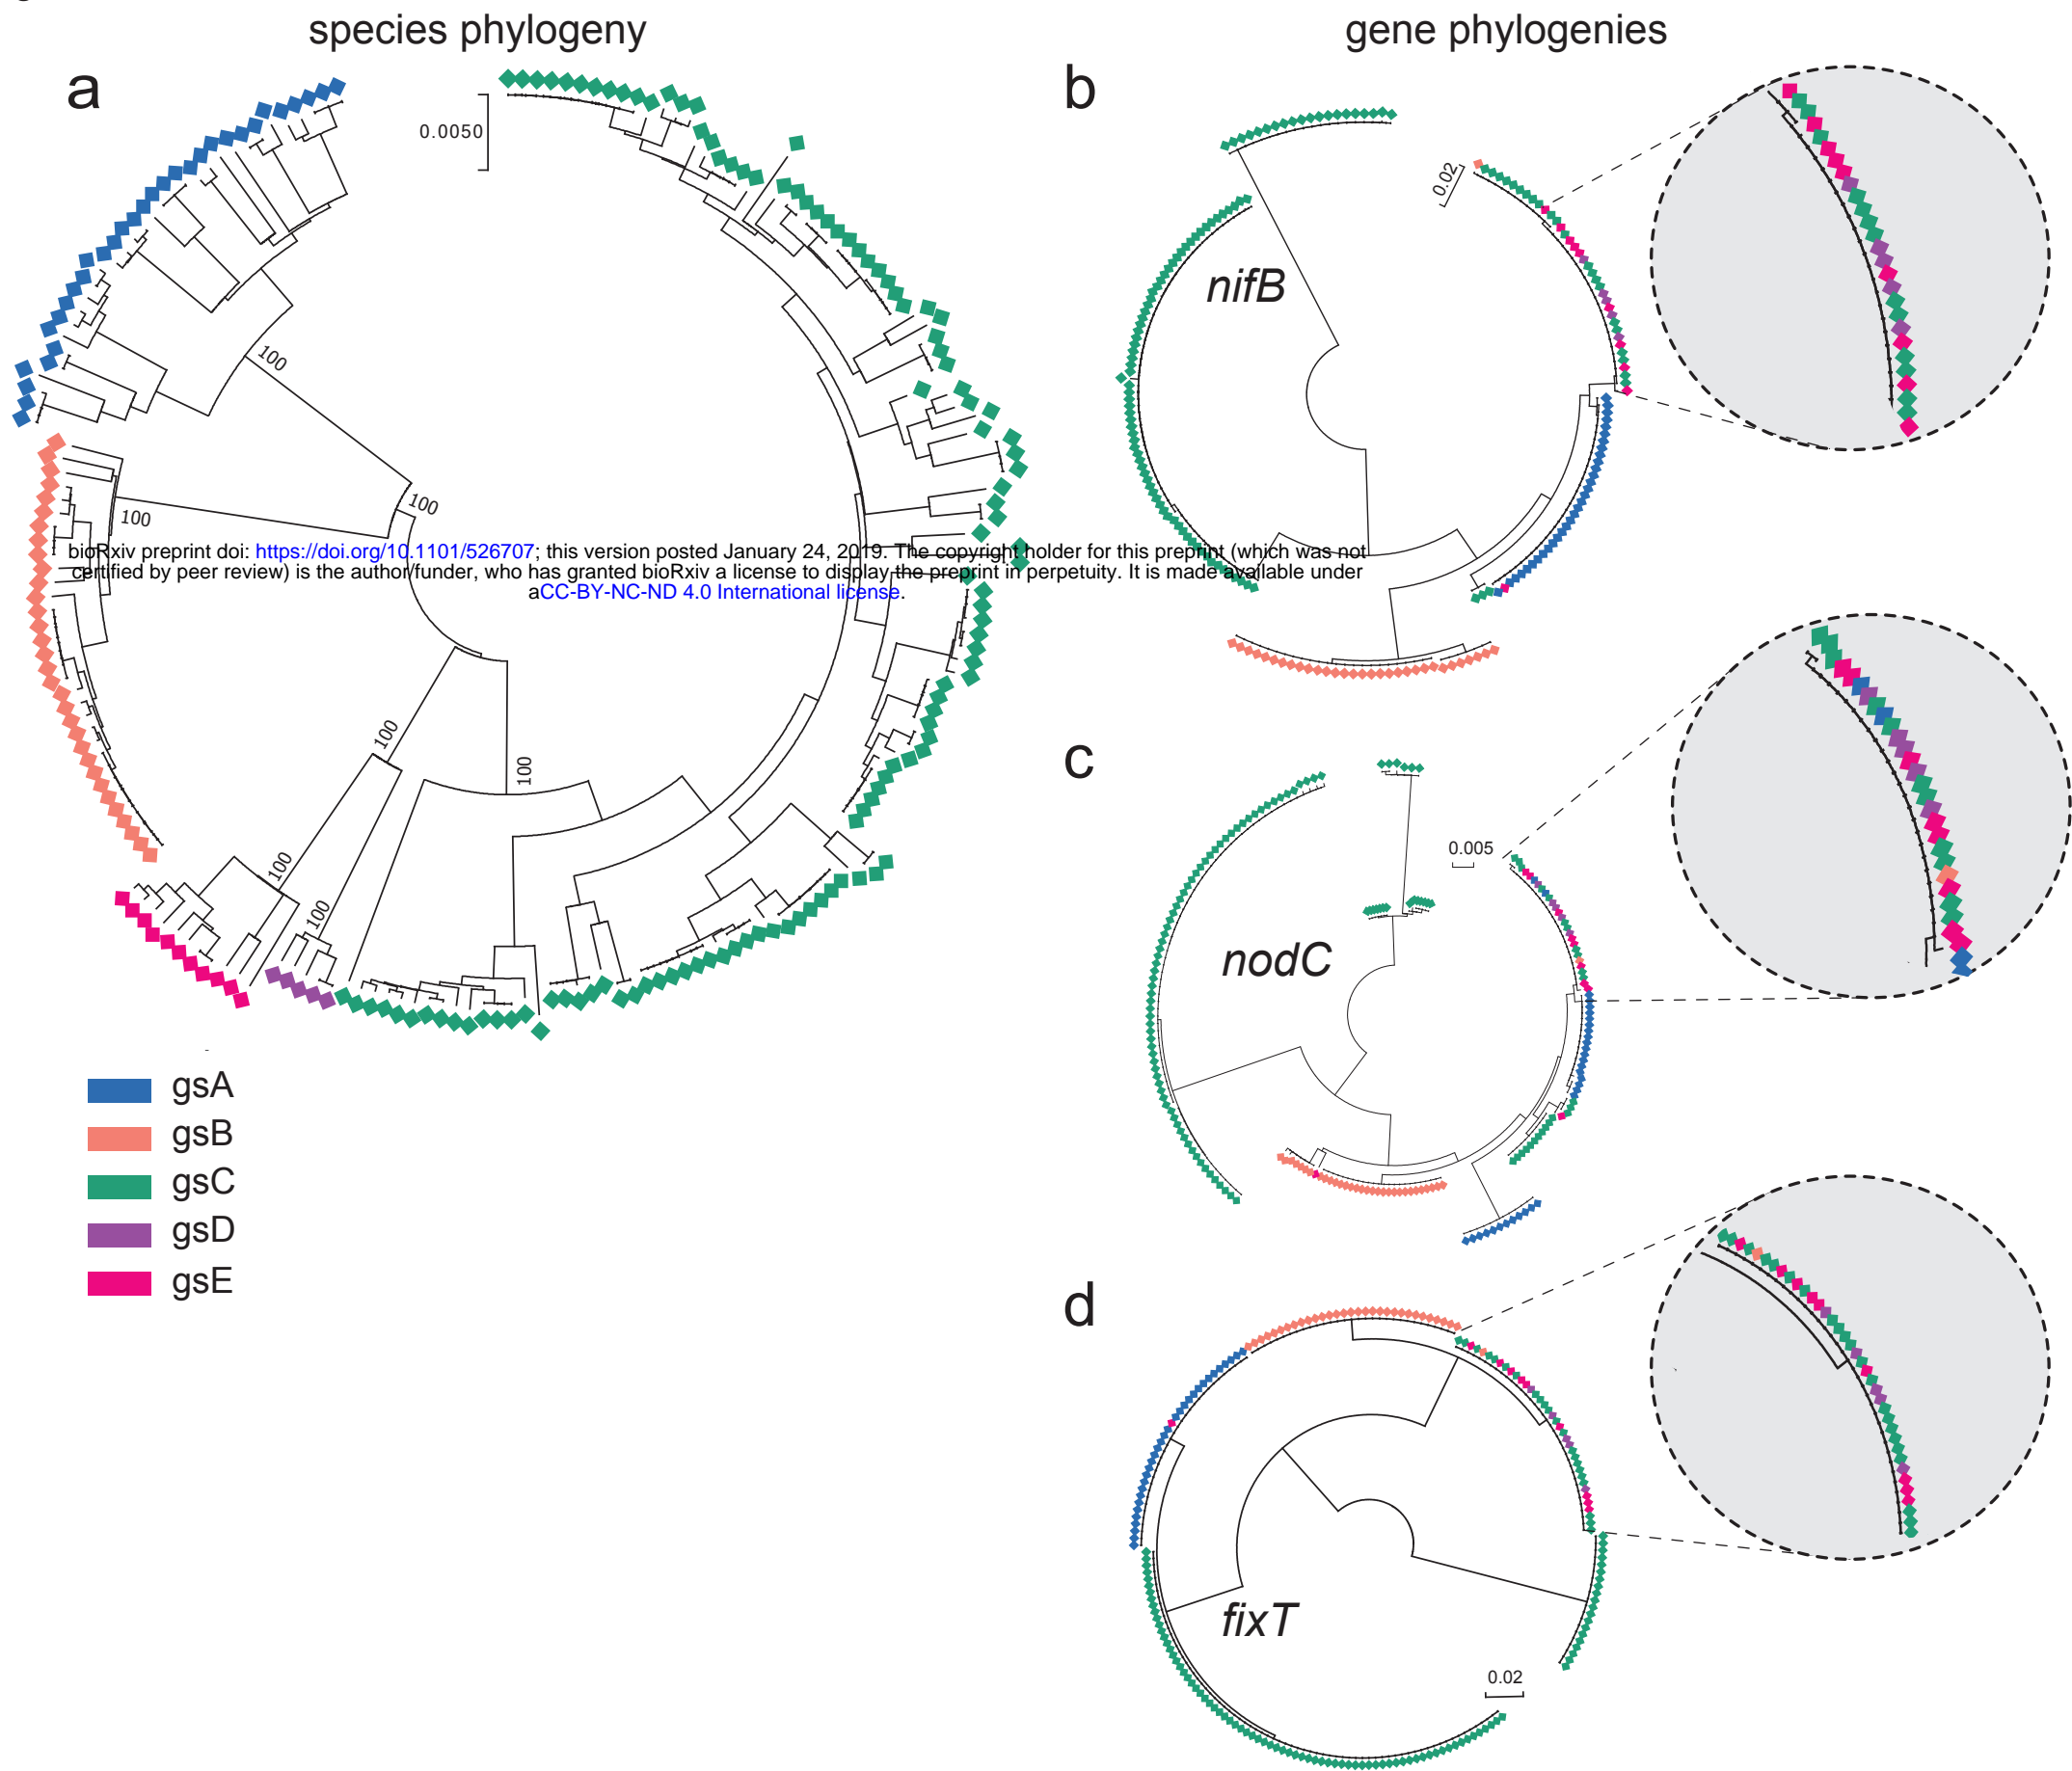

Figure 7

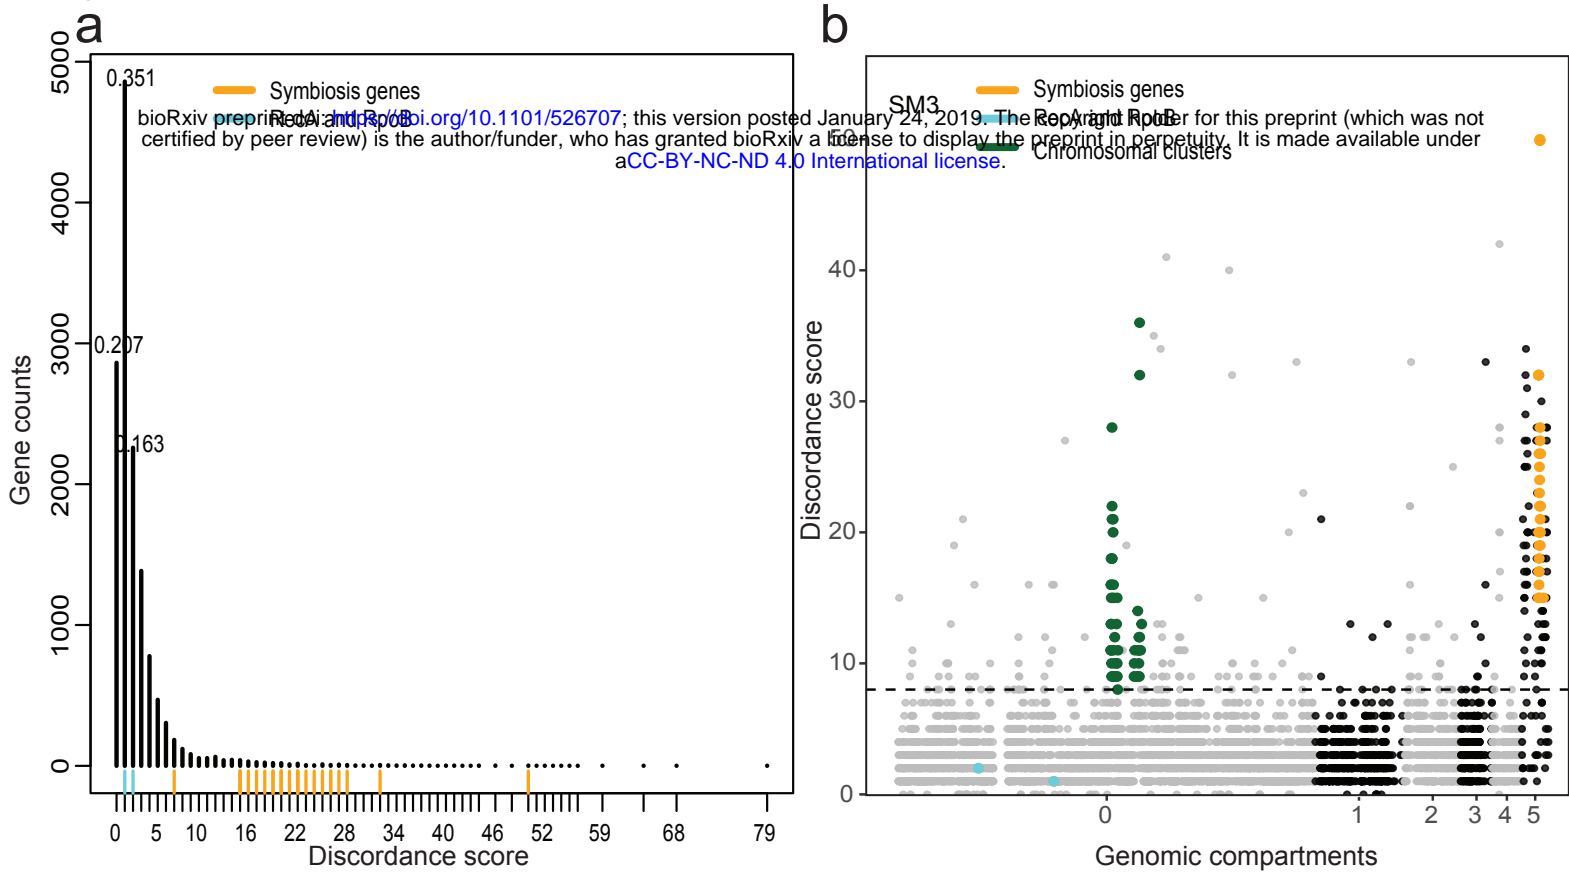

Figure 8

bioRxiv preprint doi: <https://doi.org/10.1101/526707>; this version posted January 24, 2019. The copyright holder for this preprint (which was not certified by peer review) is the author/funder, who has granted bioRxiv a license to display the preprint in perpetuity. It is made available under aCC-BY-NC-ND 4.0 International license.

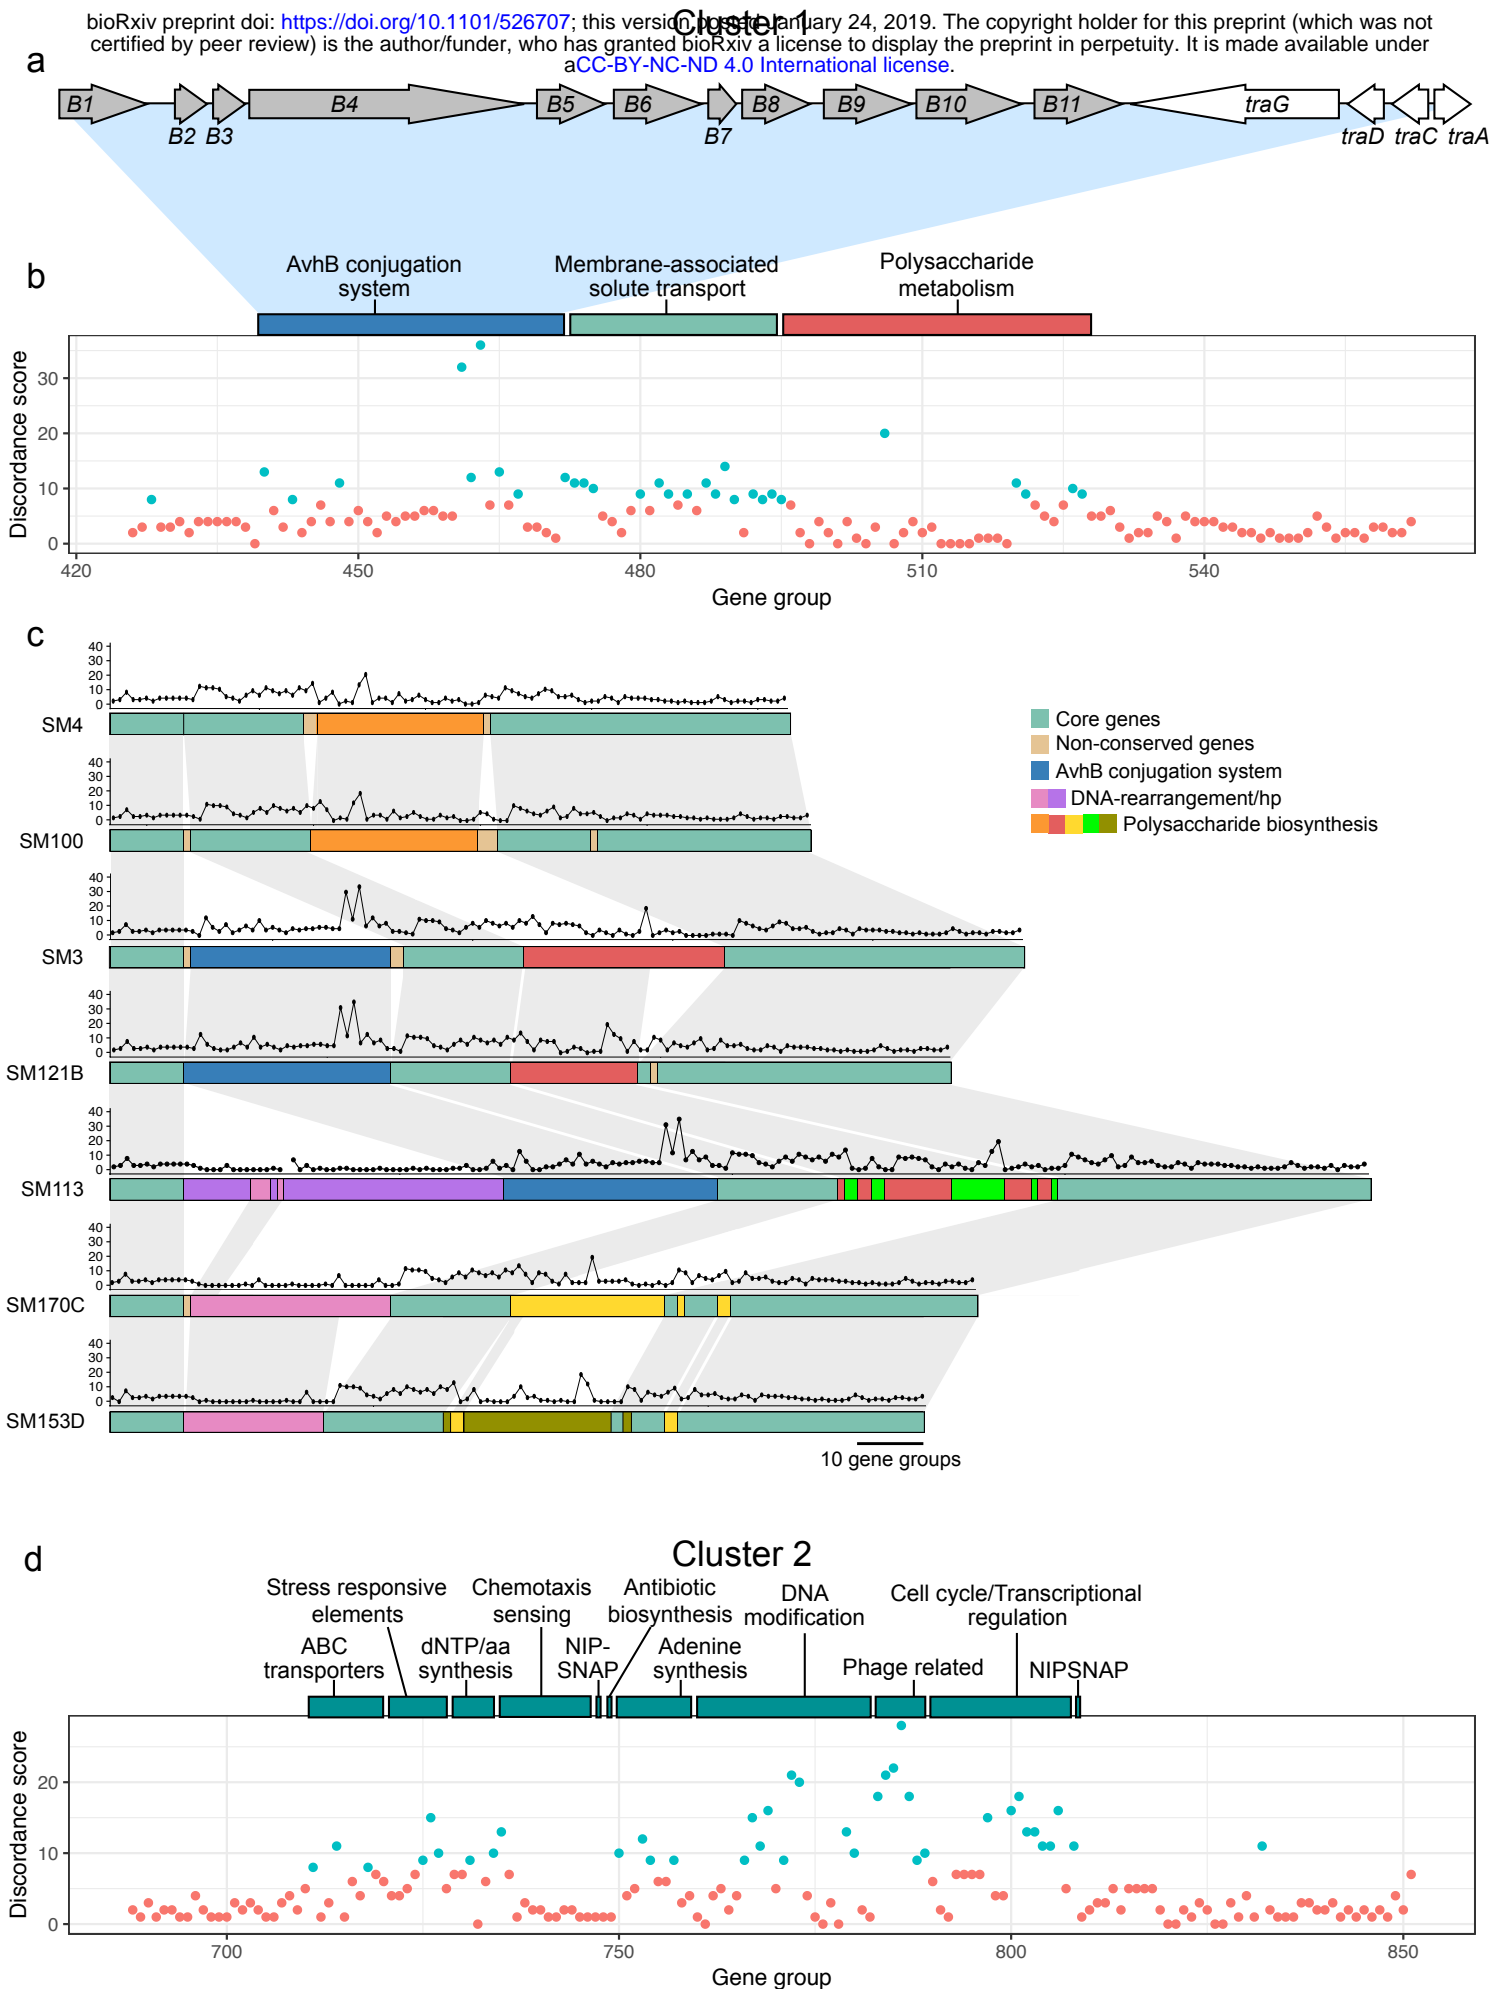

Source: https://biorxiv.org/content/biorxiv/early/2019/01/24/526707.full-text.pdf
