1  
2  
3  
4  
5  
6  
7  
8  
9  
10  
11  
12  
13  
14  
15  
16  
17  
18  
19  
20  
21  
22  
23  
24  
25  
26  
27  
28  
29  
30

Article, Discoveries section

## Title

Symbiosis genes show a unique pattern of introgression and selection within a *Rhizobium leguminosarum* species complex

### Authors:

Maria Izabel A. Cavassim<sup>1,2</sup>, Sara Moeskjær<sup>2</sup>, Camous Moslemi<sup>2</sup>, Bryden Fields<sup>3</sup>, Asger Bachmann<sup>1</sup>, Bjarni J. Vilhjalmsson<sup>1</sup>, Mikkel H. Schierup<sup>1</sup>, J. Peter W. Young<sup>3\*</sup> and Stig. U. Andersen<sup>2\*</sup>

### Author affiliations:

<sup>1</sup>Bioinformatics Research Centre, Aarhus University, Aarhus, Denmark

<sup>2</sup>Department of Molecular Biology and Genetics, Aarhus University, Aarhus, Denmark

<sup>3</sup>Department of Biology, University of York, York, United Kingdom

### Authors for correspondence:

Stig Uggerhøj Andersen, [sua@mbg.au.dk](mailto:sua@mbg.au.dk)

J. Peter W. Young, [peter.young@york.ac.uk](mailto:peter.young@york.ac.uk)

### Keywords:

Rhizobia, white clover, genome assembly, introgression, conjugation, symbiosis

## 31 Abstract

32 Rhizobia supply legumes with fixed nitrogen using a set of symbiosis genes. These can cross  
33 rhizobium species boundaries, but it is unclear how many other genes show similar mobility. Here,  
34 we investigate inter-species introgression using *de novo* assembly of 196 *Rhizobium leguminosarum*  
35 *bv. trifolii* genomes. The 196 strains constituted a five-species complex, and we calculated  
36 introgression scores based on gene tree traversal to identify 171 genes that frequently cross species  
37 boundaries. Rather than relying on the gene order of a single reference strain, we clustered the  
38 introgressing genes into four blocks based on population structure-corrected linkage disequilibrium  
39 patterns. The two largest blocks comprised 125 genes and included the symbiosis genes, a smaller  
40 block contained 43 mainly chromosomal genes, and the last block consisted of three genes with  
41 variable genomic location. All introgression events were likely mediated by conjugation, but only  
42 the genes in the symbiosis linkage blocks displayed overrepresentation of distinct, high-frequency  
43 haplotypes. The three genes in the last block were core genes essential for symbiosis that had, in  
44 some cases, been mobilized on symbiosis plasmids. Inter-species introgression is thus not limited to  
45 symbiosis genes and plasmids, but other cases are infrequent and show distinct selection signatures.  
46

## 47 Introduction

48 Mutation and meiotic recombination are the main sources of genetic variation in  
49 eukaryotes. In contrast, prokaryotes can rapidly diverge through other types of genetic exchange  
50 collectively known as horizontal gene transfer (HGT). These include transformation (through the cell  
51 membrane), transduction (through a vector), and conjugation (through cell-to-cell contact)  
52 [Ochman and Lawrence 2000; Hanage 2016]. These processes can introgress adaptive genes to  
53 distantly related species, creating specific regions of high genetic similarity.

54 It has often been suggested that HGT would blur the boundaries between species to the  
55 extent that species phylogenies would be better represented by a net-like pattern than a tree  
56 [Doolittle 1999]. This notion may have arisen when the methods for studying prokaryotic evolution  
57 and species delineation were still rudimentary, making it challenging to accurately evaluate the rate  
58 of HGT [Konstantinidis and Tiedje, 2007]. With ever-increasing numbers of bacterial whole-genome  
59 sequences (WGS), it has become possible to re-evaluate bacterial species classification

60 [Konstantinidis et al., 2006; Jain et al., 2018]. HGT, or introgression, events can be inferred using  
61 parametric or phylogenetic methods. Parametric methods rely on comparing gene features such as  
62 nucleotide composition or *k*-mer frequencies to a genomic average in order to detect outliers, which  
63 may be associated with HGT [Daubin et al., 2003; Burge and Karlin 1995]. Explicit phylogenetic  
64 methods are based on comparisons of gene and species trees aimed at detecting topological  
65 differences, whereas implicit phylogenetic methods rely on detecting aberrant distances to an  
66 outgroup reference [Lerat et al., 2003].

67 Whether sympatric species frequently exchange genetic material through HGT is still an  
68 open question and the nitrogen-fixing symbiont of legumes, *Rhizobium leguminosarum*, is a useful  
69 model for investigating inter-species introgression through HGT. There is extensive literature  
70 documenting the sharing of symbiosis-related genes among distinct, and sometimes distant, species  
71 of rhizobia [Rogel et al., 2011; Remigi et al., 2016; Andrews et al., 2018]. This occurs whether the  
72 genes are on plasmids [Segovia et al., 1993; Haukka et al., 1998; Laguerre et al., 2001; Pérez-  
73 Carrascal et al., 2016] or on conjugative chromosomal islands [Sullivan et al., 1995; Nandasena et  
74 al., 2006]. It has been previously observed that *R. leguminosarum* can be divided into distinct  
75 genospecies (*gsA*, *gsB*, *gsC*, *gsD* and *gsE*), but the host-specific symbiovars that nodulate white clover  
76 (*R. leguminosarum* *sv. trifolii*) and vetch (*R. leguminosarum* *sv. viciae*) are not confined to distinct  
77 genospecies [Kumar et al. 2015]. This provides another example of symbiosis gene transfer between  
78 sympatric rhizobia.

79 Symbiosis genes are known to increase the fitness of both symbiont and plant host (reviewed  
80 by Friesen 2012), but it is still unclear if their frequent introgression represents a special case, or if  
81 HGT is common for a wide range of genes in sympatric rhizobia. To address this question and obtain  
82 a more general understanding of introgression characteristics and mechanisms among sibling  
83 bacterial species, we assembled 196 *R. leguminosarum* genome sequences and carried out an  
84 unbiased introgression analysis.

## 85 **New approaches**

86 **Detection of gene introgression.** We introduce a simple and robust method to detect genes that  
87 show introgression across species boundaries. We build high-quality groups of orthologous genes,  
88 align them and then traverse each resulting gene tree, counting how many times an interspecies  
89 transition is encountered. This provides a direct measure of introgression frequency.

90 **Intergenic Linkage Disequilibrium (LD) analysis corrected for population structure.** In order to  
91 identify blocks of linked genes against a background of variable gene order in a bacterial species  
92 complex, we develop a method for quantifying intergenic LD while correcting for population  
93 structure. We first calculate the genetic relationship matrix of all SNPs and use it to generate  
94 pseudo-SNPs corrected for population structure (Mangin et al., 2012). We then calculate intergenic  
95 LD by applying Mantel tests to pseudo-SNP genetic relationship matrices for pairs of genes.

96

## 97 Results

### 98 Five distinct species constitute a *R. leguminosarum* species complex

99 Previous work has shown the existence of five distinct *R. leguminosarum* genospecies within  
100 one square meter of soil [Kumar et al., 2015]. To acquire a broader diversity sample from a wider  
101 geographical area, we isolated 196 rhizobium strains from white clover root nodules harvested in  
102 Denmark, France and the UK (**Figure S1-2, Table S1**). We then sequenced and *de novo* assembled  
103 the genomes of all 196 strains, followed by genome annotation and construction of orthologous  
104 gene groups (**Figure S3-5, Table S2**). To determine the relationship of our 196 strains with the  
105 previously identified genospecies, we constructed a phylogenetic tree containing RpoB sequences  
106 from known representatives of the five genospecies in addition to those from our 196 strains. This  
107 allowed us to assign all of our strains to a specific genospecies based on their position in the tree  
108 (**Figure S6**). Since our extended sampling did not result in identification of additional genospecies,  
109 the five genospecies, gsA-E, likely represent a large part of northern European *R. leguminosarum*  
110 diversity.

111 The 196 strains shared a total of 4,204 core gene groups, which had a higher median GC  
112 content than the 17,911 accessory gene groups (**Figure S7**). We calculated average nucleotide  
113 identity (ANI) based on 305 conserved genes (**Supplementary Table S3**) and on 6,529 genes present  
114 in at least 100 strains and clustered the strains based on pairwise ANI (**Figure 1a-b**). The strains were  
115 collected from different countries and field management regimes, but they clustered mainly by  
116 genospecies, although substructure related to geographic origin was also evident (**Figure 1a-b**).  
117 These patterns were similar when clustering was carried out based on shared gene content (**Figure**  
118 **1, Figure S7**). In conjunction with earlier evidence that the standard whole-genome measure of ANI

119 was lower than 0.95 for inter-genospecies comparisons [Kumar et al. 2015], these results confirm  
120 that the genospecies should be considered genuinely distinct species constituting an *R.*  
121 *leguminosarum* species complex (**Figure 1a**).

122

### 123 Plasmids are not genospecies specific

124 The genome of *R. leguminosarum* consists of a chromosome and a variable number of low-  
125 copy-number plasmids, including two that can be defined as chromids due to their size, ubiquitous  
126 presence across strains, and core gene content [Kumar et al. 2015; Young et al. 2006; Harrison et  
127 al., 2010]. In order to characterize the plasmid diversity within this species complex, we examined  
128 the sequence variation of a plasmid partitioning gene (*repA*) that is essential for stable maintenance  
129 of nearly all plasmids in *Rhizobium*. From all 196 genomes, 24 distinct *repA* sequence groups were  
130 identified. However, four of these correspond to isolated *repA*-like genes that are not part of *repABC*  
131 operons, and twelve others were rare (in no more than four genomes), so eight *repA* types account  
132 for nearly all plasmids identified (**Figure 2; Table S4**). We numbered them Rh01 to Rh08 in order of  
133 decreasing frequency in the set of genomes. Of these, Rh01 and Rh02 correspond to the two  
134 chromids *pRL12* and *pRL11* of the reference strain 3841 [Young et al., 2006] and are present in every  
135 genome. The distribution of the other plasmids shows some dependence on genospecies, but none  
136 are confined to a single genospecies. For example, Rh03 is present in all strains of gsA, gsB and gsC,  
137 but absent from gsE and in just one gsD strain, while Rh05 is universal in gsA and gsB but absent  
138 elsewhere (**Figure 2; Table S5**).

139

### 140 Identification of introgression events based on gene trees

141 To evaluate the general rate of HGT within the present *R. leguminosarum* species complex,  
142 we developed a method to detect and quantify introgression (see Material and Methods). For a  
143 given gene, present in all five genospecies, traversal of the gene phylogeny should encounter only  
144 four inter-species transitions if no introgression had occurred, yielding an introgression score of 0.  
145 All transitions in addition to the four expected would indicate introgression events, adding to the  
146 introgression score (**Figure S8**). Most gene groups displayed very low introgression scores of 0 and  
147 1 (**Figure 3a**), showing that introgression events were generally rare. At the other extreme of the

148 distribution, we identified 171 genes with an introgression score above 10, indicating that they  
149 relatively frequently cross species boundaries (**Figure 3b**).

150

### 151 Clustering genes using population structure-corrected LD

152 Gene order was variable across the species complex (**Figure S9**). To understand the nature  
153 of the genes displaying introgression, we therefore grouped them by linkage disequilibrium patterns  
154 rather than relying on the gene order of a single reference strain. The Mantel test is used to compare  
155 pairs of distance matrices, and here we used it to calculate intergenic LD by comparing genetic  
156 relationship matrices (GRM) [VanRaden, 2008]. However, when population structure exists, this  
157 approach suffers from inflation [Guillot and Rousset, 2013], and we observed this effect in our data  
158 as unexpectedly high levels of LD between plasmid-borne symbiosis genes and chromosomal core  
159 genes (**Figure S11a**). To address this issue, we calculated a genetic relationship matrix based on all  
160 SNPs and used it to generate pseudo-SNPs corrected for population structure for every gene (see  
161 Material and Methods, Mangin et al., 2012). We then compared the gene pseudo-SNP genetic  
162 relationship matrices using the Mantel test in order to calculate intergenic LD. After this correction  
163 for population structure, symbiosis genes and chromosomal core genes no longer appeared to be  
164 in LD (**Figure S11b**). We then proceeded to cluster the 171 genes that frequently crossed species  
165 boundaries based on their LD patterns. The genes separated into four clusters, where LD blocks 1  
166 and 2 comprised the plasmid-borne symbiosis genes, block 3 contained mainly chromosomal genes  
167 and block 4 comprised three genes with a distinct LD pattern (**Figure 3b, Figure S10**). It is worth  
168 noting that, because of our stringent criteria, the LD blocks detected by our method are just a  
169 representation of some of the introgressed genes within each LD block region (**Figure 4a-c**).

170

### 171 Chromosomal introgression depends on specialized transfer systems

172 There was a clear substructure in the LD patterns among the genes in the chromosomal  
173 cluster (**Figure 3b**, LD Block 3), and we examined the larger LD blocks in greater detail. The largest  
174 block comprised 12 genes (**Figure 3b**, LD Block 3.1), most of which were present in nearly all of the  
175 196 strains. Cluster 3.1 included a number of hypothetical proteins, a NIPSNAP family containing  
176 protein, a phage shock protein PspA and others (**Table S9, Figure 4a**). We also observed toxin-

177 antitoxin (VapC/YefM) genes (group696 and group697) in LD with this cluster (**Table S7**). However,  
178 we did not find genes that could directly explain the mobility of this introgressed region.

179 The second largest cluster (**Figure 3b**, LD Block 3.2) comprised six genes including a LysR  
180 family transcriptional regulator, an antibiotic biosynthesis monooxygenase, an  
181 exopolyphosphatase, TPR repeat-containing protein and an ABC transporter ATP-binding protein.  
182 To check whether the cluster could be in LD with genes that may explain its mobility, but which had  
183 not been detected by the stringently filtered introgression analysis (see Material and Methods), we  
184 extracted the genes in strongest LD with the six genes in the cluster 3.2 (**Table S7**). Three genes  
185 appeared to be in strong LD with at least one type IV secretion protein. The introgressing genes  
186 were found in different genomic contexts, and are likely chromosomal core genes that have been  
187 mobilised by different types of transfer systems (**Figure 4b-d**). In SM3 and SM121B the introgressing  
188 genes were downstream of a complete type IV secretion system, which resembles the  
189 *Agrobacterium tumefaciens* AvhB system [Chen et al., 2002] (**Figure 4b-d**). In SM170C and SM153D,  
190 another type of mobility system containing mostly hypothetical proteins along with some DNA-  
191 rearrangement genes and integrases neighbored the introgressed genes (**Figure 4d, Table S7**). In  
192 SM4 and SM100 the same core genes are present, but the transfer system has likely been lost.

193

#### 194 Symbiosis gene introgression is driven by a few conjugative plasmids

195 Symbiosis genes were in the tail of the introgression score distribution (**Figure 3a**), and a  
196 detailed analysis of three symbiosis genes (*nifB*, *nodC* and *fixT*) confirmed these patterns of HGT  
197 (**Figure 5a-c**). We also observed a complex LD pattern for the clusters comprising the symbiosis  
198 genes (**Figure 3b**, LD block 1-2), which is consistent with the presence of multiple accessory genes  
199 in distinct symbiosis plasmids within the species complex. To understand the mechanisms behind  
200 sym-gene introgression we investigated the symbiosis plasmids further. Where the assembly was  
201 complete enough to assign symbiosis genes to a specific plasmid, there was a clear pattern.  
202 Genospecies A symbiosis plasmids are all Rh06, in gsB they are Rh07, gsC has mostly Rh04 but some  
203 Rh07 and Rh08, gsD has Rh08, gsE has mostly Rh08 but some Rh06 and Rh07 (**Figure 2; Figure 5d;**  
204 **Table S5**). There are striking differences in the apparent mobility of these plasmids. Conjugal  
205 transfer genes (*tra* and *trb*) are present in some Rh06 plasmids and in all Rh07 and Rh08 plasmids,  
206 including those that are symbiosis plasmids. These transfer genes are all located together

207 immediately upstream of the *repABC* replication and partitioning operon, in the same arrangement  
208 as in the plasmid p42a of *R. etli* CFN42, which has been classified as a Class I, Group I conjugation  
209 system [Wetzel et al., 2015]. Some *repA* sequences of sym plasmids from strains of different  
210 genospecies are identical or almost identical in sequence (**Figure 5e** and **Figure S12**). The  
211 phylogenies of the corresponding conjugal transfer genes (e.g. *traA*, *trbB* and *traG*) show the same  
212 pattern (**Figure S13**), indicating that symbiosis plasmids have crossed genospecies boundaries  
213 through conjugation. Rh08 is the most striking example (**Figure 5e**), since all strains containing a  
214 Rh08 sym-plasmid were found in an introgressed clade (**Figure S14**). We investigated the impact of  
215 this plasmid on introgression by repeating the introgression analysis in the absence of strains  
216 carrying Rh08. The mean introgression scores of all LD blocks decreased as a result of removing  
217 Rh08, but did not fully drop to background levels (**Table 1**). By randomly excluding the same number  
218 of strains and excluding them from the alignments we observed a slight decrease from 16.81 to  
219 14.97 in the average introgression score across the 171 genes (**Table S9**). When we excluded all of  
220 the strains in the *fixT* introgressed clade (**Figure 5c**, **Figure S14**), which includes strains carrying Rh08  
221 or Rh07, the introgression scores of the plasmid-borne LD blocks (**Figure 3b**, LD blocks 1 and 2)  
222 decreased greatly, whereas the chromosomal genes (**Figure 3b**, LD block 3) were less affected (**Table**  
223 **1**).

224  
225 [Some \*fix\* genes show variation with respect to replicon location](#)

226 Our LD analysis also singled out a small group of three genes that were in strong LD with  
227 each other, showed no LD with the chromosomal cluster and limited LD with the symbiosis cluster  
228 (**Figure 3b** block 4). These include *fixH*, *fixG* and a gene encoding an FNR-like protein, which are  
229 usually associated with a larger cluster of genes, *fixNOQPGHIS*, that are essential for symbiotic  
230 nitrogen fixation [Young et al. 2006]. However, they are atypical in several ways, as they have a high  
231 GC content similar to that of the core genome, they do not show the high Tajima's D values we  
232 found typical of the main symbiosis genes, and they show variation with respect to the replicon they  
233 are associated with. In some strains, they are placed on symbiosis plasmids, in others they are  
234 located in the chromosome; other strains have two copies of the gene placed in two different  
235 genomic compartments (**Supplementary Table S5**). The introgression signal is greatly reduced when



236 the *fixT* introgressed clade is removed (**Table 1**), implying that most of the introgression of block 4  
237 is mediated by the mobile Rh08 and Rh07 symbiosis plasmids.

238

### 239 Symbiosis genes show a unique selection signature

240 The chromosomal and plasmid-borne genes that exhibited introgression were not in LD and  
241 their mobility appeared to depend on different transfer systems. We wanted to investigate if the  
242 differences between the two classes of genes displaying introgression extended to selection  
243 signatures. We therefore calculated Tajima's D, which detects deviations from the expected level of  
244 nucleotide diversity based on the number of segregating sites and pairwise differences within each  
245 gene group. Across all 196 strains, only relatively few genes showed high Tajima's D values (**Table**  
246 **S5**) indicating deviations from neutral evolution. The genes within the symbiosis clusters (LD blocks  
247 1-2) were prominent among these, making up to 57 out of the genes with the top 250 Tajima's D  
248 scores. Since Rh08 appeared to have spread rapidly with very limited accumulation of diversity, this  
249 plasmid could be the driver of the high Tajima's D observed for the symbiosis genes. Again, we  
250 evaluated this by excluding Rh08-bearing strains from the analysis and re-calculating Tajima's D  
251 (**Table 2, Table S9**). We found that plasmid LD blocks (LD blocks 1 and 2) showed decreased Tajima's  
252 D values on exclusion of Rh08 strains, while Tajima's D values for chromosomal genes (LD block 3)  
253 were generally unaffected (**Table 2, Table S9**). We then calculated Tajima's D values exclusively for  
254 strains found in the introgressed clade (*fixT*, **Figure 5c**), which includes both Rh08 and Rh07 carrying  
255 strains. The resulting Tajima's D values for the symbiosis genes were negative, consistent with fewer  
256 haplotypes than expected based on the number of segregating sites (**Table 2**).

257 Interestingly, after excluding all Rh08 strains or the clade of introgressed strains (Rh08 and  
258 some Rh07), symbiosis genes still retained high Tajima's D values. This indicates that multiple  
259 symbiosis gene haplotypes are also maintained at intermediate frequencies in the set of strains that  
260 does not exhibit symbiosis gene introgression. Therefore, the elevated Tajima's D values can not be  
261 attributed solely to the existence of distinct versions of mobile symbiosis plasmids that have spread  
262 rapidly through the species complex.

263 Although the known symbiosis genes showed Tajima's D patterns that were distinct from  
264 the average behavior of the genes in the plasmid-borne LD blocks, there were other genes in these  
265 blocks that showed similar patterns (**Table S8**), suggesting that they may be either under direct

266 selection, e.g. having unknown roles in symbiosis, or might be hitchhiking with symbiosis genes  
267 under selection.

## 268 Discussion

### 269 Robust detection of introgression events based on gene tree traversal

270 HGT or introgression events in bacteria are often inferred using parametric or phylogenetic  
271 methods. Parametric methods [Lawrence and Ochman 2002; Azad and Lawrence 2007; van Passel  
272 et al., 2005] are most well suited for detecting introgression events between distantly related  
273 species, where introgression results in markedly different genomic signatures, such as abrupt  
274 changes in GC content. Detection of introgression between more closely related species, such as  
275 the members of the *R. leguminosarum* species complex described here, requires the use of  
276 phylogenetic methods that rely on gene trees derived from carefully constructed groups of  
277 orthologous genes. Because of the clear grouping of our strains into five distinct species (**Figure 1a**),  
278 we chose a simplified phylogenetic tree-traversal approach. Counting the number of transitions  
279 between genospecies on traversal proved to be a robust method for detecting introgression events,  
280 as we detected the symbiosis genes, which were candidates *a priori*. In addition, the method  
281 frequently detected groups of physically co-located and genetically linked genes, although the genes  
282 were analysed independently (**Figure 3b**). The method is mainly limited by the accuracy of the gene  
283 trees and the level of differentiation between the species for each gene group, but we found that  
284 filtering away genes with too few segregating sites was efficient in controlling the false positive rate.  
285 Another limitation is that our approach requires gene groups of a certain size, meaning that it can  
286 not be used to detect introgression of accessory genes present at low frequency within the  
287 population. Here, we limited analysis of introgression to gene groups with more than 50 members.

288

### 289 Analysis of intergenic LD helps to resolve distinct introgression events

290 Within the *R. leguminosarum* species complex, the symbiosis genes are carried by different  
291 plasmid types (**Figure 2**), and variation in gene order and content create complex syntenic  
292 relationships (**Figure S9**). LD analysis is therefore a convenient way of understanding which  
293 introgressed genes travel together. The Mantel test has frequently been used in the comparison of  
294 genetic divergence with geographical distances [Diniz-Filho et al., 2013]. In the present study, we

295 have applied it to calculate the genetic correlations (LD) among genes by comparing their genetic  
296 relationship matrices (GRM) [VanRaden 2008]. When autocorrelation of the GRM elements exists,  
297 possibly driven by population structure, then a relatively high false positive rate is observed  
298 [Harmon and Glor, 2010; Rousset 2002]. Aware of this effect, we used the method proposed by  
299 Mangin et al., 2012 and corrected the bias due population and phylogenetic structure. This  
300 approach is also frequently used for population structure correction in genome-wide association  
301 studies [Sauvage et al., 2014; Mamid et al., 2014]. To our knowledge, this is the first example of  
302 using a Mantel test combined with population structure-corrected pseudo-SNPs for estimation of  
303 intergenic LD. We found that calculating LD using this procedure resolved the LD inflation problem  
304 (**Figure S11**), allowing us to reliably cluster the introgressed genes based on their LD patterns.

### 305 306 **Introgression within the *R. leguminosarum* species complex is rare**

307 Our introgression analysis clearly showed that genes travel across species boundaries within  
308 the species complex. Perhaps the most surprising finding was that the vast majority of genes showed  
309 no evidence of HGT, indicating that introgression events are rare. The sympatric, closely related  
310 species were thus well-separated with respect to gene flow, and specialized, conjugative transfer  
311 mechanisms appear to be required for genes to cross species barriers. We found that one of the  
312 chromosomal introgressed regions (LD block 3.2) likely represented an ICE. The *avhB* gene cassette  
313 and the *traG* gene of the type IV secretion system of this putative ICE resembles a conjugative  
314 transfer system encoded by the *virB/traG* of the plasmid pSymA of *S. meliloti* [Galibert et al., 2000,  
315 Barnett et al., 2001] and the *virB/virD4* of *Bartonella tribocorum* [Schulein et al., 2002]. However,  
316 both T4SSs in *A. tumefaciens* and *S. meliloti* (AvhB and VirB, respectively) mediate the transfer of  
317 whole plasmids, whereas we are proposing that the T4SS encoded in LD block 3.2 mediates the  
318 transfer of an integrative conjugative element (ICE). Other integrative and conjugative elements  
319 have been observed in the rhizobial genera (*Mesorhizobium loti*: [Sullivan and Ronson, 1998];  
320 *Azorhizobium caulinodans*: [Ling et al., 2016], *Sinorhizobium*: [Zhao et al., 2017]) and in other species  
321 (*Streptococcus agalactiae*: [Rosini et al., 2006], *Bacillus subtilis*: [Merkl, 2004], *V. cholerae*:  
322 [Heidelberg et al., 2000]). Likewise, symbiosis plasmid transfer appears to require that the plasmids  
323 harbor a functional conjugal transfer system (*traI, trbBCDEJKLFGHI, traRMHBFACDG*), which is the  
324 case for all strains in the introgressed clade (**Figure 5, Fig S12-13-14**).

325

## 326 Symbiosis gene transfer is mediated by conjugative plasmids

327 The occurrence of HGT of symbiosis genes within and between distant rhizobial genera  
328 (*Rhizobium*, *Bradyrhizobium*, *Sinorhizobium*, *Azorhizobium*, and *Mesorhizobium*), nodulating  
329 different legume species, has been widely reported [Pérez-Carrascal et al., 2016; Hirsch et al, 1980;  
330 Rogel et al., 2011; Lemaire et al., 2015; Andrews et al., 2018]. This shows that symbiosis gene  
331 transfer is not restricted by genetic divergence and in many cases is not species specific [Provorov  
332 and Andronov, 2017; Greenlon et al., 2019].

333 Here, we have shown that species-specific clades still exist even among symbiosis genes  
334 (**Figure 5a-c**). In most species-specific clades, the genes were carried on a non-mobile symbiosis  
335 plasmid (Rh04) (**Fig S14**), suggesting that, in this species complex, symbiosis gene introgression was  
336 only observed when the strain had a plasmid with a conjugation apparatus. We verified this by  
337 characterizing the plasmid diversity within the strain pool. Symbiosis plasmids belong to a number  
338 of plasmid types (Rh04, Rh06, Rh07 and Rh08), and phylogenetic evidence indicated that some of  
339 them (Rh07 and Rh08) have been transferred through conjugation between different genospecies  
340 (**Figure 5e, Figure S12**). These transfers are likely recent since many of the sequences (*repA* and *tra*  
341 genes) have not yet diverged. Because conjugation requires cell-to-cell contact, plasmid transfer is  
342 not just constrained by genetic similarity [Silva et al., 2003; Pérez-Carrascal et al., 2016], but also by  
343 the requirement that the donor and recipient are found at the same location.

344

## 345 There is introgression of *fix* genes that vary in genomic location

346 The genes that displayed introgression and were on symbiosis plasmids (LD blocks 1 and 2)  
347 were not in LD with the introgressing chromosomal genes (LD block 3) (**Figure 3**) and they displayed  
348 different selection signatures (**Table 2**), indicating that chromosomal and plasmid-associated  
349 introgression events are independent. LD block 4 was atypical, because it contained putative  
350 symbiosis genes that showed variation with respect to replicon location and were conspicuously  
351 absent from the immobile symbiosis plasmid Rh04 (**Table S5**). These genes are part of the  
352 *fixNOQPGHIS* cluster, and it is known that this set of genes is essential for symbiotic nitrogen  
353 fixation, but that a single copy is sufficient [Young et al., 2006]. Nevertheless, their high GC content  
354 and frequent chromosomal location indicates that these are core genes that have been co-opted

355 into a symbiotic role. Consistently, they show introgression when a copy has been acquired by one  
356 of the mobile types of symbiosis plasmid. This suggests that they have been mobilized as a  
357 consequence of their symbiotic function, perhaps because they confer an advantage when  
358 transferred to a recipient that does not have an optimal *fixNOQPGHIS* cluster for symbiosis.

359

### 360 [Intermediate frequency symbiosis gene haplotypes co-exist in sympatry](#)

361 Just as the five genospecies co-exist, so do different symbiosis gene haplotypes and  
362 plasmids. The symbiosis genes had strikingly high Tajima's D values, indicating an excess of  
363 intermediate-frequency haplotypes. The *fixT* gene is the gene with the fewest haplotypes,  
364 presenting only five haplotypes in total (**Supplementary Figure S14**). Four of these are present in  
365 the Danish organic fields, and the haplotype characteristic of the introgressed clade was found at  
366 trial sites in Denmark, France, and the UK as well as in Danish organic fields (**Supplementary Table**  
367 **S5**).

368 The presence of distinct groups of haplotypes at intermediate frequency could be a result of  
369 negative frequency dependent selection [Amarger & Lobreau, 1982; Provorov and Vorobyov,  
370 2000b; Provorov and Vorobyov, 2006; Bever, 1999]. This type of balancing selection could actively  
371 maintain symbiont diversity by increasing the fitness advantage of strains when they are rare. An  
372 alternative, not necessarily mutually exclusive hypothesis, is that distinct symbiosis haplotypes are  
373 maintained by host specialization. If the selective optimum between rhizobium and its host changes  
374 over time, symbiosis gene alleles that contribute to the interaction will experience repeated partial  
375 sweeps, increasing the frequency of different adaptive alleles in different parts of the allelic range.  
376 Under balancing selection, these partial local sweeps can create elevated differentiation among  
377 allelic haplotypes and reduce nucleotide and haplotype diversity in the regions flanking each  
378 selected locus [Yoder et al., 2014; Garud et al., 2015].

379 The 196 strains characterized here were all collected from clover root nodules, and the  
380 colonisation of nodules is a bottleneck that imposes strong selection. We see that certain  
381 haplotypes of symbiosis-related genes have introgressed across multiple genospecies, implying that  
382 these genes provide a fitness benefit that is largely independent of the genomic background.  
383 However, this pattern of selection appears to be exceptional, because the number of other genes  
384 that showed a similarly high introgression signal was very limited. Most of the thousands of

385 accessory genes in the gene pool are not strongly introgressing, suggesting that they are  
386 contributing to the adaptive differences that presumably distinguish the different genospecies.  
387 Judging from our results, the high mobility of symbiosis genes, extensively documented in the  
388 literature, is not typical of the accessory genome in general.

389

## 390 Conclusions

391 Using new methods for detection of introgression events and intergenic LD analysis, we  
392 carried out an unbiased investigation of introgression within an *R. leguminosarum* species complex.  
393 We found that introgression was generally very limited, with most genes displaying genetically  
394 distinct, species-specific variants. Striking exceptions are the genes located on symbiosis plasmids,  
395 especially the symbiosis genes, and a limited number of chromosomal islands, which appear to  
396 travel across species boundaries using conjugative transfer systems. The plasmid and chromosomal  
397 introgression events are independent and subject to different selective pressures, and some genes  
398 appear to move both between species and between replicons.

399

## 400 Material and Methods

401

### 402 Rhizobium sampling and isolation

403 White clover (*Trifolium repens*) roots were collected from three breeding trial sites in the United  
404 Kingdom (UK), Denmark (DK), and France (F) (Figure S1A), and 50 Danish organic fields (DKO) (Figure  
405 S1b). Roots were sampled from 40 plots from each trial site. The total number of plots was 170. The  
406 samples were stored at ambient temperature for 1-2 days and in the cold room (2) for 2-5 days prior  
407 to processing. Pink nodules were collected from all samples, and a single bacterial strain was  
408 isolated from each nodule as described by [Bailly et al., 2011]. From each plot, 1 to 4 independent  
409 isolates were sampled. In total 249 strains were isolated from *T. repens* nodules. For each site the  
410 clover varieties were known, and representative soil samples from clover-free patches were  
411 collected and sent for chemical analysis. Furthermore, latitude and longitude data were collected  
412 (Table S1).

413

## 414 Genome assembly

415 A set of 196 strains was subjected to whole genome shotgun sequencing using 2x250 bp Illumina  
416 (Illumina, Inc., USA) paired-end reads by MicrobesNG (<https://microbesng.uk/>, IMI - School of  
417 Biosciences, University of Birmingham). In addition, 8 out of the 196 strains were re-sequenced  
418 using PacBio (Pacific Biosciences of California, Inc., USA) sequencing technology (Table S2, Figure  
419 S2). Analysis of 16S rDNA confirmed that all 196 of the strains were *Rhizobium leguminosarum*.

420 Genomes were assembled using SPAdes (v. 3.6.2) [Bankevich et al., 2012]. SPAdes contigs  
421 were cleaned and assembled further, one strain at a time, using a custom Python script (Jigome,  
422 available at <https://github.com/jpwyong/genomics>). First, low-coverage contigs were discarded  
423 because they were mostly contaminants from other genomes sequenced in the same Illumina run.  
424 The criterion for exclusion was a SPAdes k-mer coverage less than 30% of the median coverage of  
425 putative single-copy contigs (those > 10kb). Next, putative chromosomal contigs were identified by  
426 the presence of conserved genes that represent the syntenic chromosomal backbone common to  
427 all *R. leguminosarum* genospecies. A list of 3215 genes that were present, in the same order, in the  
428 chromosomal unitigs of all eight of the PacBio assemblies was used to query the Illumina assemblies  
429 using *blastn* ( $\geq 90\%$  identity over  $\geq 90\%$  of the query length). In addition, contigs carrying *repABC*  
430 plasmid replication genes were identified using a set of *RepA* protein sequences representing the  
431 twenty distinct plasmid groups found in these genomes (*tblastn* search requiring  $\geq 95\%$  identity over  
432  $\geq 90\%$  of the query length). A 'contig graph' of possible links between neighbouring contigs was  
433 created by identifying overlaps of complete sequence identity between the ends of contigs. The  
434 overlaps created by SPAdes were usually 127 nt, although overlaps down to 91 nt were accepted.  
435 Contigs were flagged as 'unique' if they had no more than one connection at either end, or if they  
436 were > 10 kb in length. Other contigs were treated as potential repeats. The final source of  
437 information used for scaffolding by Jigome was a reference set of *R. leguminosarum* genome  
438 assemblies that included the eight PacBio assemblies and 39 genomes publicly available in GenBank.  
439 A 500-nt tag near each end of each contig, excluding the terminal overlap, was used to search this  
440 database by *blastn*; high-scoring matches to the same reference sequence, with the correct spacing  
441 and orientation, were subsequently used to choose the most probable connections through repeat  
442 contigs. Scaffolding was initiated by placing all the chromosomal backbone contigs in the correct  
443 order and orientation, based on the conserved genes that they carried, and extending each of them

444 in both directions, using the contig graph and the pool of remaining non-plasmid contigs, until the  
445 next backbone contig was reached or no unambiguous extension was possible. Then each contig  
446 carrying an identified plasmid origin was similarly extended as far as possible until the scaffold  
447 became circular or no further extension was justified, and unique contigs that remained  
448 unconnected to chromosomal or plasmid scaffolds were extended. Finally, scaffolds were  
449 connected if their ends had appropriately spaced matches in the reference genomes. Scaffold  
450 sequences were assembled using overlap sequences to splice adjacent contigs exactly, or inserting  
451 an arbitrary spacer of twenty "N" symbols if adjacent contigs did not overlap. The *dnaA* gene (which  
452 was the first gene in the chromosomal backbone set and is normally close to the chromosomal origin  
453 of replication) was located in the first chromosomal scaffold, and this scaffold was split in two, with  
454 chromosome-01 starting 127 nt upstream of the ATG of *dnaA* and chromosome-00 ending  
455 immediately before the ATG. The remaining chromosomal scaffolds were numbered consecutively,  
456 corresponding to their position in the chromosome. Plasmid scaffolds were labelled with the  
457 identifier of the *repA* gene that they carried. Scaffolds that could not be assigned to the  
458 chromosome or a specific plasmid were labelled 'fragment' and numbered in order of decreasing  
459 size. Subsequent analysis revealed large exact repeats in a few assemblies. These were either  
460 internal inverted repeats in the contigs created by SPAdes (5 instances) or large contigs used more  
461 than once in Jigome assemblies (18 instances). They were presumed to be artifacts and removed  
462 individually. Assembly statistics were generated with QUAST (v 4.6.3, default parameters)  
463 [Gurevich et al, 2013]. (Figure S3). Genes were predicted using PROKKA (v 1.12) [Seemann, 2014].  
464 In summary, genomes were assembled into [10-96] scaffolds, with total lengths of [8355366-  
465 6967649] containing [6,642-8,074] annotated genes, indicating that we have produced assemblies  
466 of reasonable quality, which comprehensively captured the gene content of the sequenced strains  
467 (Table S2 and S3).

468

#### 469 Orthologous genes prediction

470 Orthologous gene groups were identified among a total of 1,468,264 predicted coding sequences  
471 present across all (196) strains. We used two software packages for ortholog identification:  
472 Proteinortho [Lechner et al., 2014] and Syntenizer3000  
473 (<https://github.com/kamiboy/Syntenizer3000/>). The software Proteinortho (v5.16b), was executed



474 with default parameters and the synteny flag enabled, to predict homologous genes while taking  
475 into account their physical location. For the analysis in this paper, we were only interested in  
476 orthologs and not paralogs. Paralogous genes predicted by Proteinortho were filtered out by  
477 analyzing the synteny of homologous genes surrounded by a 40-gene neighbourhood (see Synteny  
478 section). After this filtering step, the orthologous gene groups were aligned using ClustalO ([Sievers  
479 et al., 2011], v. 1.2.0). Each gene sequence was translated into its corresponding amino acid  
480 sequence before alignment and back-translated to the original nucleotides. Each gap was replaced  
481 by 3 gaps, resulting in a codon-aware nucleotide alignment.

482

### 483 Synteny

484 First, gene groups were aligned with their neighbourhoods (20 genes each side) using a modified  
485 version of the Needleman-Wunsch algorithm [Needleman and Wunsch, 1970]. We counted the  
486 number of gene neighbours that were syntenic across strains before a collinearity break. We used  
487 this score to disambiguate gene groups that contain paralogs. Paralogs are the result of gene  
488 duplication, and as such one of the paralogs is the original, and the rest are copies. Based on  
489 similarity, we kept the least divergent gene inside of the original homology group while removing  
490 the copied paralogs, if possible into a new gene group designated group name “-”2. Orphan genes  
491 that were present only in one strain, were removed from the analysis.

492

### 493 Variant Calling

494 Codon-aware alignments were used in order to detect single nucleotide polymorphisms (SNPs). For  
495 a given gene alignment and position, we first counted the number of unique nucleotides (A, C, T, G).  
496 Sites containing 2 unique nucleotides were considered variable sites (bi-allelic SNPs). After finding  
497 variable sites, SNP matrices were encoded as follows: major alleles were encoded as 1 and minor  
498 alleles as 0. Gaps were replaced by the site mean. Later steps were executed in order to filter out  
499 unreliable SNPs. We restricted the analyses to genes found in at least 100 strains. By looking at the  
500 variants and their codon context, we excluded SNPs placed in codons containing gaps, or containing  
501 more than one SNP, or with multi-allelic SNPs. Based on these criteria we ended up with 6,529 out  
502 of 22,115 genes and 441,287 SNPs. Scripts and pipelines are available at a GitHub repository  
503 ([https://github.com/izabelcavassim/Rhizobium\\_analysis/](https://github.com/izabelcavassim/Rhizobium_analysis/)).

504

## 505 Plasmid replicon groups

506 Plasmid replication genes (repABC operons) were located in the genome assemblies by *tblastn*,  
507 initially using the RepA protein sequences of the reference strain 3841 as queries (Young et al.,  
508 2006). Hits covering  $\geq 70\%$  of the query length were accepted as repA genes, and those with  $\geq 90\%$   
509 amino acid identity were considered to belong to the same replication group (putative plasmid  
510 compatibility group). Hits with lower identity were used to define reference sequences for  
511 additional groups, using sequences from published *Rhizobium* genomes when available, or from  
512 strains in this study. Groups were numbered (Rh01, etc) in order of decreasing abundance in the  
513 genome set. RepB and RepC sequences corresponding to the same operons as the RepA ref- erences  
514 were used to check whether the full *repABC* operon was present at each location, requiring  $\geq 85\%$   
515 amino acid identity.

516

## 517 Presence of symbiosis genes in all strains

518 Since all sequenced strains were isolated from white clover nodules, they are expected to carry the  
519 canonical symbiosis genes. One strain, SM168B, carried no symbiosis genes. Subsequent nodulation  
520 tests showed that the strain could colonize white clover and produce pink nodules, suggesting that  
521 the genes were lost during the pre-sequencing processing. On the other hand, strains SM165B and  
522 SM95 were found to have duplicated symbiosis regions.

523

## 524 Population genetic analysis

525 Population genetic parameters (Tajima's D, nucleotide diversity, average pairwise differences and  
526 number of segregating sites) were estimated using the python library dendropy [Sukumaran, 2010].

527

## 528 Introgression Score

529 Despite the clear grouping of the 196 strains into distinct species, there was still extensive cross-  
530 species sequence conservation, allowing the construction of high-quality orthologous gene groups  
531 (**Table S4**). We took advantage of these for detecting introgression events by generating and  
532 traversing gene trees for each of the gene groups. Individual gene trees were first constructed using  
533 the neighbor-joining clustering method (software RapidNJ version 2.3.2) [Simonsen and Pedersen

534 2011]. Each tree was traversed based on depth first traversal algorithm [Tarjan, 1972] by visiting  
535 each node after visiting its left child and before visiting its right child, searching deeper in the tree  
536 whenever possible. When the leaf of the tree was reached, the strain number and its genospecies  
537 origin were extracted. A list containing the genospecies was stored for the entire tree. The  
538 introgression score was computed as following:

$$539 \quad \text{Introgression score} = \text{number of shifts} - \text{set}(\text{genospecies}) + 1$$

540 The introgression score evaluates the number of times a shift (from one genospecies to another) is  
541 observed in a branch. The minimum possible is the total number of genospecies -1 shifts. A tree  
542 congruent to the species tree would have a introgression score equal to zero (**Figure S8**).

543

#### 544 [Intergenic Linkage Disequilibrium corrected for population structure](#)

545 Sample structure or relatedness between genotyped individuals leads to biased estimates of linkage  
546 disequilibrium (LD) and increase of type I error. In order to correct for the autocorrelation present  
547 in this data, the genotype matrix  $X$  (coded as 0's and 1's) was adjusted as exemplified in Mangin et  
548 al. 2012 and Long et al. 2013.

549 The covariance  $\hat{V}$  between individuals was calculated as follows:

550 Let  $N$  denote the total number of individuals and  $M$  the total number of markers, the full genotype  
551 matrix ( $X$ ) has  $N \times M$  dimensions with genotypes encoded as 0's and 1's. For simplicity, each SNP  
552 information is looked as vectors,  $S_{(j,i)} = 1, \dots, M$ .

553 The first step of the calculations was to apply a Z-score normalization on the SNP vectors by  
554 subtracting each vector by its mean and divide it by its standard deviation  $\left(\frac{S_j - \mu_j}{\sigma_j}\right)$ .

555 We then computed the covariance matrix between individuals as follows.

$$556 \quad \text{Cov}(X'_j) = \hat{V} = \frac{1}{M-1} \sum_{i=1}^M (X_i - \bar{X})(X_j - \bar{X})'$$

557  $\text{Cov}(X)$ , can also be computed by the dot product of the genotype matrix:

$$558 \quad \text{Cov}(X') = \hat{V} = \frac{1}{M} XX'$$

559 The result is an  $N \times N$  matrix, where  $N$  is the number of strains. This matrix is also known as Genomic  
560 Relationship Matrix (GRM) [VanRaden, 2008]. We then decomposed the GRM matrix using `linalg`  
561 function of `scipy` (python library).

562

563 Then the ‘decorrelation’ of genotype matrix  $X$  was done by multiplying  $X$  by the inverse of the  
564 square root of  $\hat{V}$  as follow:

$$565 \quad T_i = \hat{V}^{-1/2} X_i$$

566  $T$  is therefore the pseudo SNP matrix, which is corrected for population structure.

567 The correlation between genes matrices was obtained by applying mantel test on the GRM (genetic  
568 distances) between pairs of genes:

569 For a data set composed of a distance matrix of gene X ( $D_{ij}^x$ ) and a genetic distance matrix of gene  
570 Y ( $D_{ij}^y$ ), it was computed the scalar product of these matrices adjusted by the means and variances  
571 ( $var(X)$  and  $var(y)$ ) of the matrices X and Y:

$$572 \quad r_{cor} = \frac{\Sigma(D_{ij}^x - \underline{X})(D_{ij}^y - \underline{Y})}{\sqrt{var(X)var(Y)}}$$

573 The standardized Mantel test is actually the Pearson correlation between the elements of genes X  
574 and Y.

575

## 576 [Filtering criteria for top introgressed genes](#)

577 In order to identify genes that had trustable signals of introgression we used a stringent filtering  
578 criteria as follows: number of sequences > 50; number of segregating sites > 10; average pairwise  
579 differences > 10, ANI > 0.7, introgression score > 10.

580

## 581 [Author’s contributions](#)

582 Conceptualization: MIAC, JPWY, SM, MHS and SUA; Methodology: MIAC, JPWY and SM; Software:  
583 MIAC, AB, BV, JPWY and CM; Validation: MIAC, CM, SM, JPWY; Formal Analysis: MIAC, JPWY, CM,  
584 SM, AB, BV and BF; Investigation: SM; Resources: SUA, JPWY and MHS; Data Curation: MIAC, CM,  
585 JPWY, SM, SUA and MHS; Writing - Original Draft: MIAC; Writing - Review and Editing: MIAC, JPWY,  
586 SUA, MHS, SM, BV; Visualization: MIAC, SM, JPWY; Supervision: SUA, JPWY, MHS; Project  
587 Administration: SUA; Funding Acquisition: SUA.

588

## 589 Acknowledgements

590 This work was funded by grant no. 4105-00007A from Innovation Fund Denmark (S.U.A.). Genome  
591 sequencing was provided by MicrobesNG, which is supported by the BBSRC (grant number  
592 BB/L024209/1). The authors would also like to thank industrial partners DLF Trifolium, SEGES and  
593 Legume Technology Ltd. for their contribution to the field trials.

594

## 595 Competing interests

596 The authors declare that they have no competing interests.

597

## 598 Availability of data and materials

599 The data that support the findings of this study are available in the INSDC databases under  
600 Study/BioProject ID PRJNA510726. Accessions numbers are from SAMN10617942 to  
601 SAMN10618137 consecutively and are also provided in the **Supplementary table S10**.

602 Gene alignments SNP data and metadata can be downloaded from the following folder:

603 <https://www.dropbox.com/sh/6fceqmwfa3p3fm6/AAAkFIRcf7ZxgO1a4fHv3FeOa?dl=0>

604

## 605 Tables

606 **Table 1.** Mean introgression score with and without introgressed clade.

| LD block   | Introgression score all strains | Introgression score without Rh08 strains | Introgression score without introgressed clade |
|------------|---------------------------------|------------------------------------------|------------------------------------------------|
| LD block 1 | 17.46                           | 7.49                                     | 3.10                                           |
| LD block 2 | 17.47                           | 7.65                                     | 3.00                                           |
| LD block 3 | 13.18                           | 9.02                                     | 8.93                                           |
| LD block 4 | 24.00                           | 13.66                                    | 6.00                                           |

|                 |       |      |      |
|-----------------|-------|------|------|
| Symbiosis genes | 20.81 | 9.43 | 3.00 |
|-----------------|-------|------|------|

607

608

609

610 **Table 2.** Tajima's D with and without given strains sets.

| LD block        | Tajima's D all strains | Tajima's D without Rh08 strains | Tajima's D without introgressed clade | Tajima's D of only introgressed clade |
|-----------------|------------------------|---------------------------------|---------------------------------------|---------------------------------------|
| LD block 1      | 2.40                   | 1.00                            | 1.13                                  | -0.81                                 |
| LD block 2      | 1.90                   | 0.66                            | 0.51                                  | 0.08                                  |
| LD block 3      | 0.45                   | 0.42                            | 0.47                                  | 0.54                                  |
| LD block 4      | -0.15                  | -0.32                           | -0.001                                | 0.24                                  |
| Symbiosis genes | 2.58                   | 2.49                            | 2.75                                  | -0.62                                 |

611

612

613

614 **Figures**

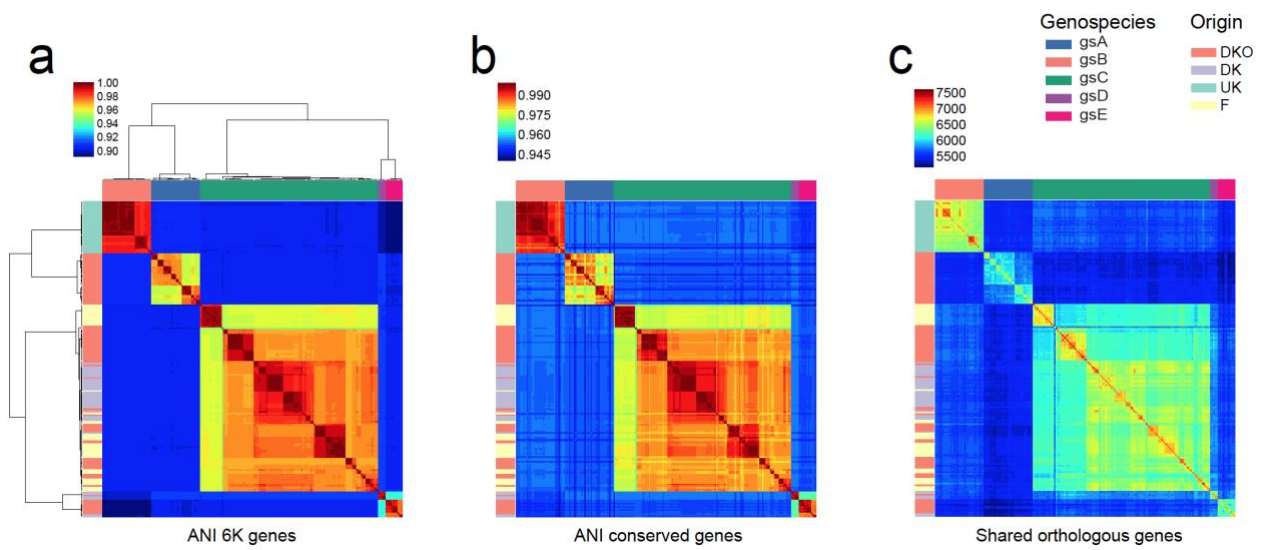

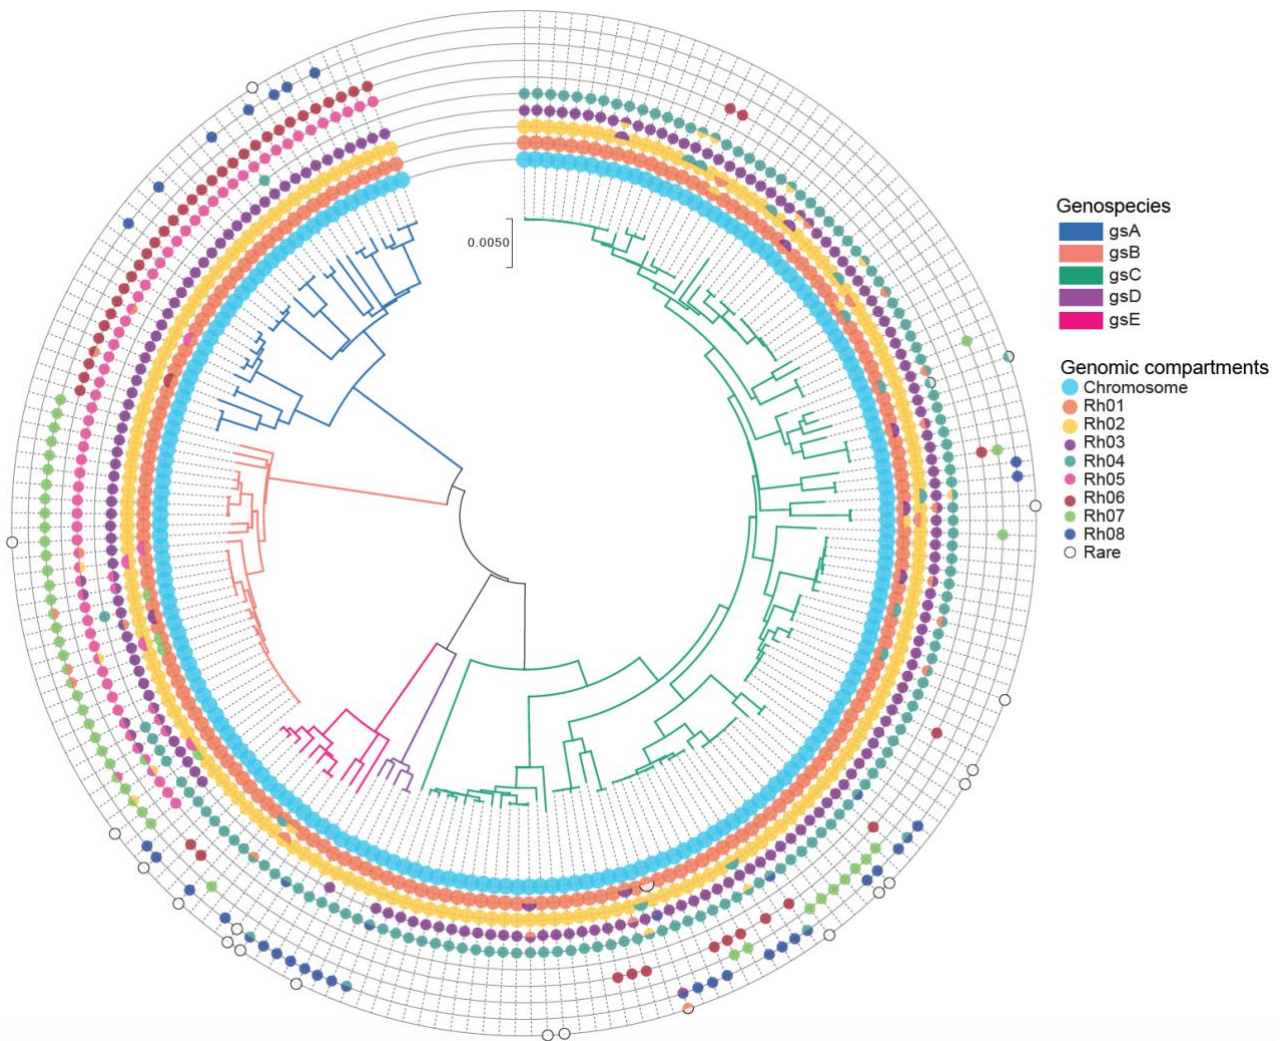

625

626 **Figure 2. Characterization of plasmid diversity.** Species phylogeny based on the concatenation of 305 core  
627 genes using the neighbor-joining method. Branches are coloured by genospecies. Circles represent the  
628 genomic compartments observed in each strain. Chromids (Rh01 and Rh02) and plasmids (Rh03, Rh04, Rh05,  
629 Rh06, Rh07, Rh08) were defined based on the genetic similarity of the RepA plasmid partitioning protein.

630

631

632



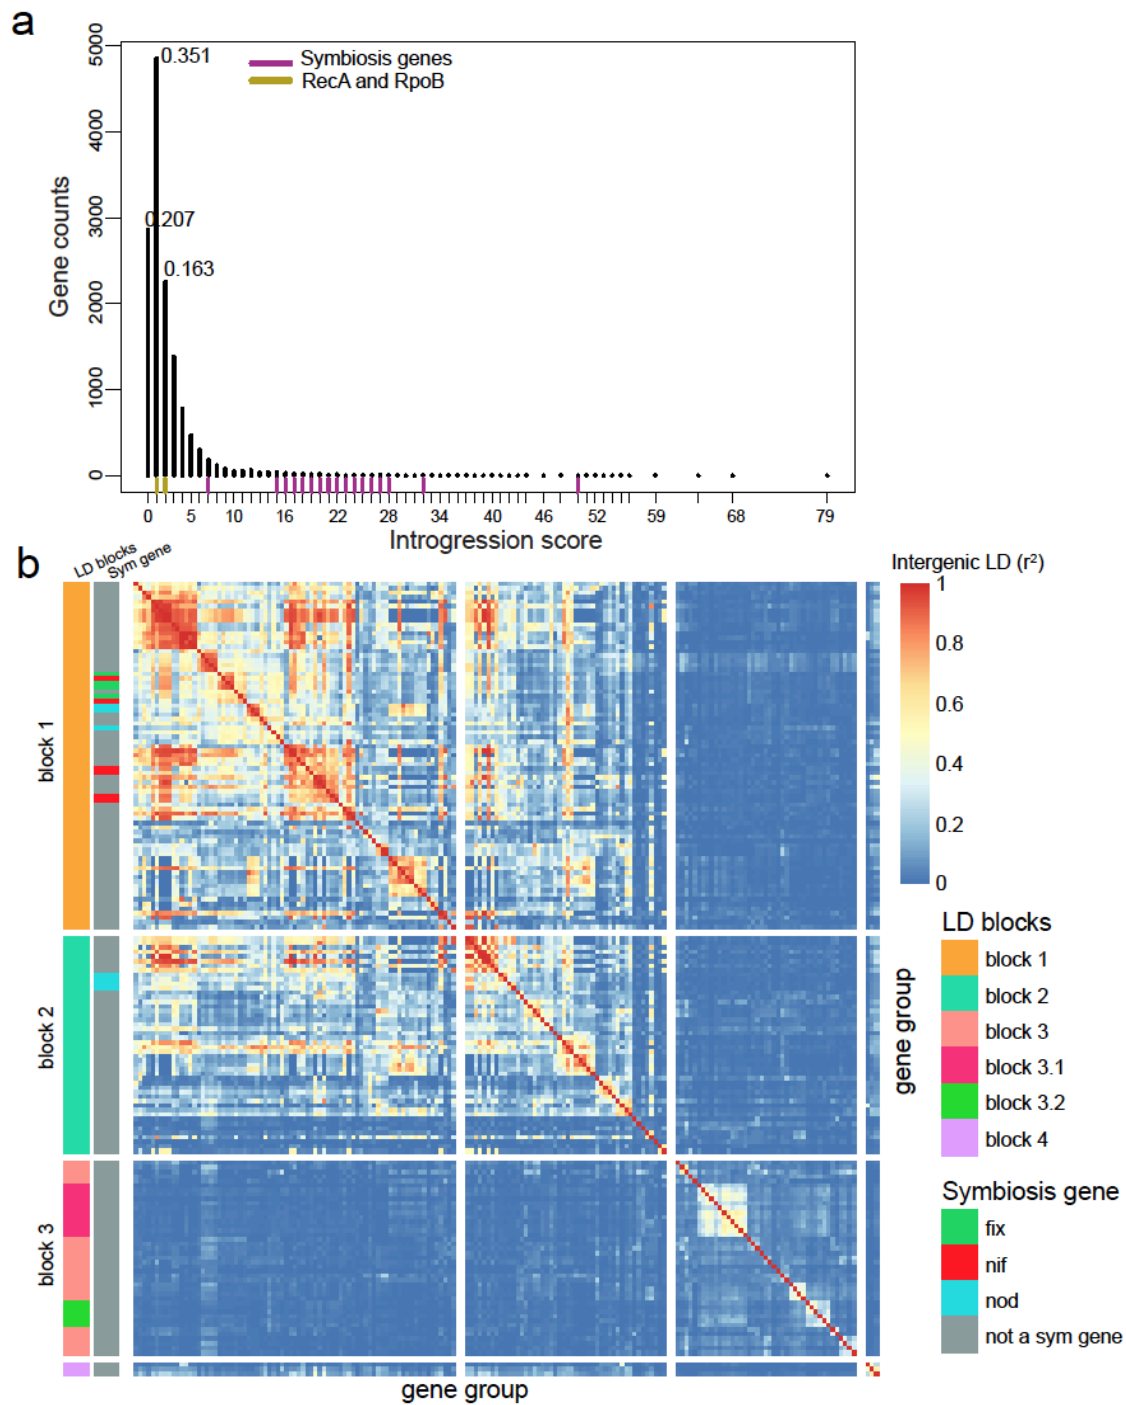

640

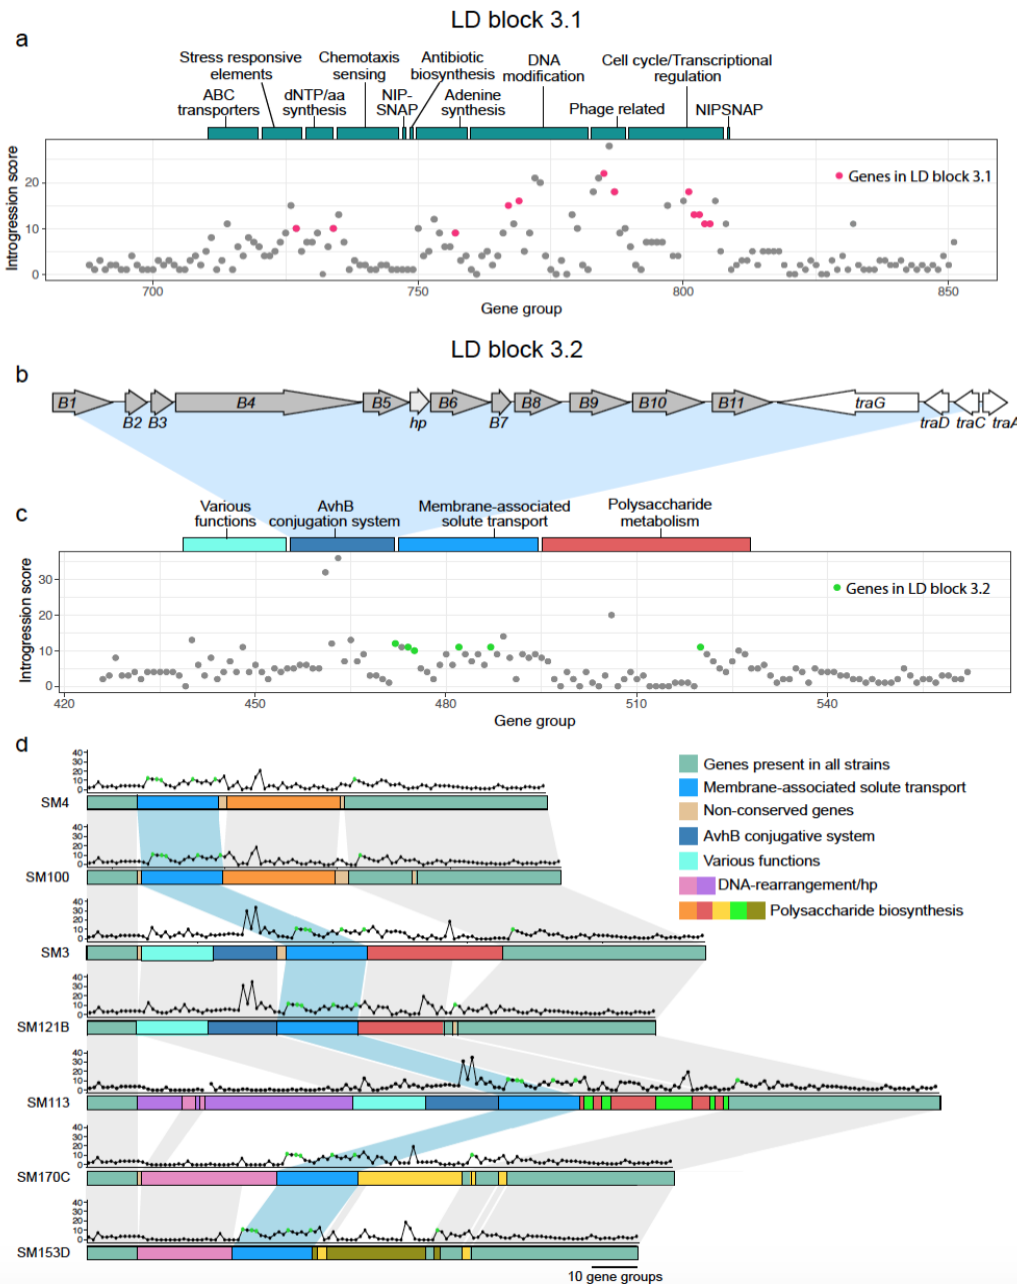

641

642 **Figure 4. Functionality of chromosomal islands.** (a) Distribution of LD block 3.1 on strain SM3. Bars above  
 643 the chart represent the classification of gene groups found in the area. (b) Gene organization of the avhB/tra  
 644 type IV secretion system from SM3. (c) Distribution of introgression scores for LD block 3.2. Coloured bars  
 645 above the chart represent the classification of gene groups found in the area. (d) Illustration of synteny  
 646 between gene groups in LD block 3.2 for strains lacking an insert (SM4, SM100), with the avhB/Tra  
 647 conjugative system (SM3, SM121B), with a DNA rearrangement gene cluster (SM170C, SM153D), and one  
 648 strain with both inserts (SM113). Dot plots above the gene group lines represent the introgression score for  
 649 each gene in the gene group. Green dots represent the genes found in LD block 3.2.

650  
651

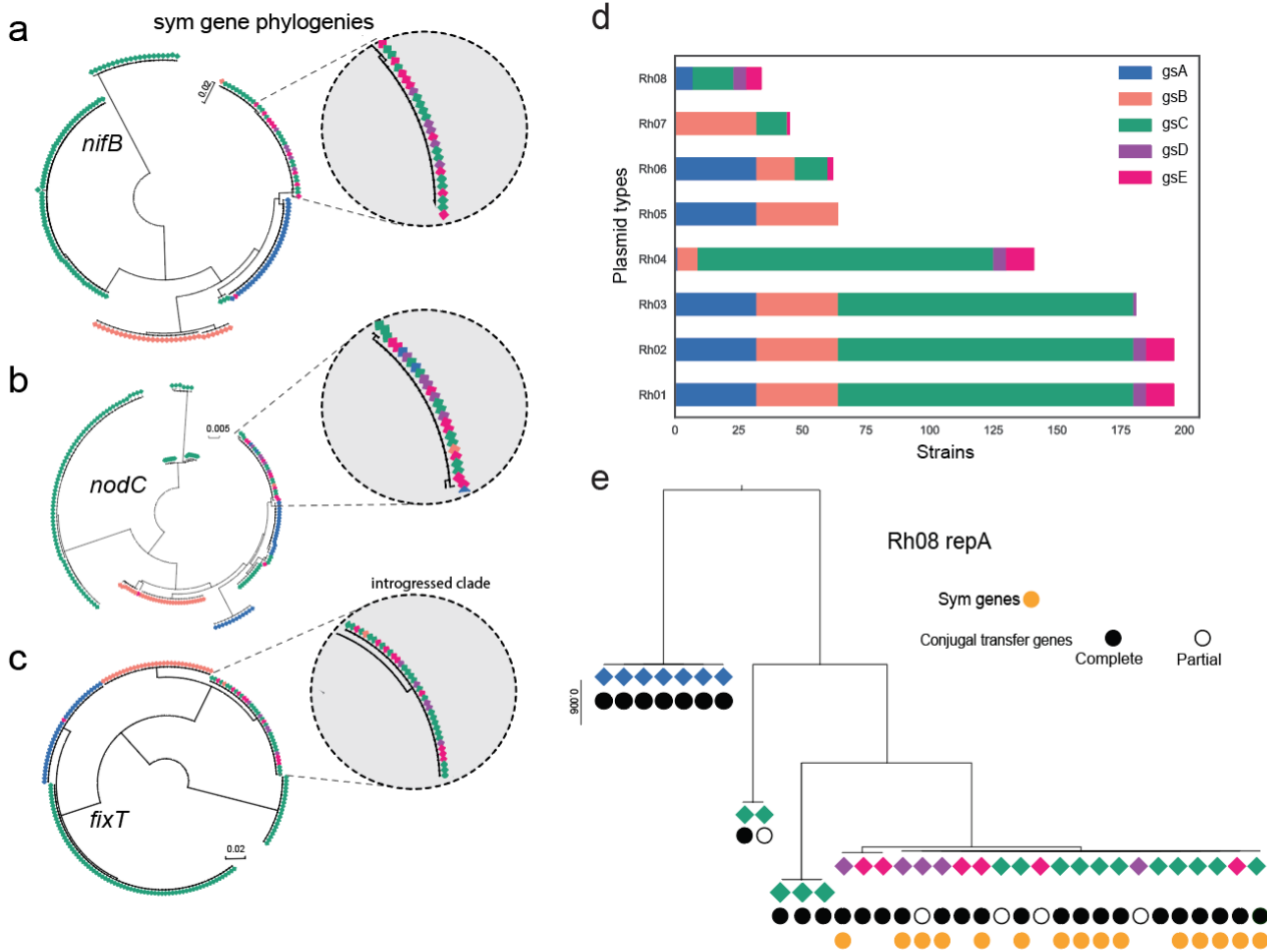

652

653 **Figure 5. Evidence of horizontal gene transfer between genospecies.** (a)-(c) Examples of symbiosis gene  
 654 phylogenies, with insets showing clades in which identical alleles are shared across genospecies. (d) The  
 655 distribution of plasmid groups, which were defined based on the genetic similarity of the RepA plasmid  
 656 partitioning protein. (e) Phylogenetic analysis of the *repA* gene of plasmid type Rh08. A complete set of  
 657 conjugal transfer genes has the following genes upstream of *repA*: *traI, trbBCDEJKLFGHI, traRMHBFACDG*,  
 658 with the origin of transfer (*oriT*) between *traA* and *traC*. Partial sets are broken by the end of the scaffold,  
 659 mostly after *traM*. The color of the diamond indicates the genospecies origin with reference to panel (d).

660

661

662

## 663 Additional Files

### 664 Supplementary figures

- 665 **Figure S1-2.** Map of soil sampling locations;
- 666 **Figure S3.** Pacbio assembly stats;
- 667 **Figure S4.** Spades and Jigome assembly;
- 668 **Figure S5.** Overall assembly stats;
- 669 **Figure S6.** Phylogenetic tree based on *rpoB* and genospecies classification;
- 670 **Figure S7.** Core and accessory genes;
- 671 **Figure S8.** Introgression score scheme;
- 672 **Figure S9.** Structural rearrangements between genospecies;
- 673 **Figure S10.** Introgression score distribution across pacbio assemblies
- 674 **Figure S11.** Population structure effects on LD estimates;
- 675 **Figure S12.** *repA* phylogeny of plasmid Rh07;
- 676 **Figure S13.** Phylogenies of *tra* genes of plasmid Rh08;
- 677 **Figure S14.** Phylogeny of *fixT* and sym-plasmid classification;

678

### 679 Supplementary tables

680 This file is a multi-page table composed of the following information:

- 681 **Table S1.** Metadata: information on field trials for each isolate;
- 682 **Table S2.** Genome statistics: information on genome assemblies;
- 683 **Table S3.** Conserved genes: list of conserved genes used for species tree construction;
- 684 **Table S4.** *RepA* types: representatives of *repA* types; Rh classification and nucleotide sequences;
- 685 **Table S5.** Genes statistics: information on genes and plasmid types for each isolate;
- 686 **Table S6.** Population genetic parameters: of every orthologous gene and introgression scores;
- 687 **Table S7.** Inserts description: LD analysis between chromosomal introgressed clade and *avhB* description;
- 688 **Table S8.** Symbiosis genes parameters: pop. gen. parameters of symbiosis genes in contrast to *recA* and *rpoB*;
- 689 **Table S9.** Stats on the top 171 introgressed genes. Tajima's D and introgression score stats with and without
- 690 specific sets of strains;
- 691 **Table S10.** Accession numbers of the 196 genomes.

## References

- [1] Alt-Mörbe, J et al. “The conjugal transfer system of *Agrobacterium tumefaciens* octopine-type Ti plasmids is closely related to the transfer system of an IncP plasmid and distantly related to Ti plasmid vir genes.” In: *Journal of bacteriology* 178.14 (1996), pp. 4248–4257.
- [2] Amarger, Noëlle and Lobreau, Jean Pierre. “Quantitative study of nodulation competitiveness in *Rhizobium* strains”. In: *Appl. Environ. Microbiol.* 44.3 (1982), pp. 583–588.
- [3] Andrews, Mitchell et al. “Horizontal transfer of symbiosis genes within and between rhizobial genera: occurrence and importance”. In: *Genes* 9.7 (2018), p. 321.
- [4] Azad, Rajeev K and Lawrence, Jeffrey G. “Detecting laterally transferred genes: use of entropic clustering methods and genome position”. In: *Nucleic acids research* 35.14 (2007), pp. 4629–4639.
- [5] Bailly, Xavier et al. “Population genomics of *Sinorhizobium medicae* based on low-coverage sequencing of sympatric isolates”. In: *The ISME journal* 5.11 (2011), p. 1722.
- [6] Bailly, Xavier et al. “Recombination and selection shape the molecular diversity pattern of nitrogen-fixing *Sinorhizobium* sp. associated to *Medicago*”. In: *Molecular Ecology* 15.10 (2006), pp. 2719–2734.
- [7] Bankevich, Anton et al. “SPAdes: a new genome assembly algorithm and its applications to single-cell sequencing”. In: *Journal of computational biology* 19.5 (2012), pp. 455–477.
- [8] Barnett, Melanie J et al. “Nucleotide sequence and predicted functions of the entire *Sinorhizobium meliloti* pSymA megaplasmid”. In: *Proceedings of the National Academy of Sciences* 98.17 (2001), pp. 9883–9888.
- [9] Bever, JD. “Dynamics within mutualism and the maintenance of diversity: inference from a model of interguild frequency dependence”. In: *Ecology Letters* 2.1 (1999), pp. 52–61.
- [10] Burge, Christopher B and Karlin, Samuel. “Finding the genes in genomic DNA”. In: *Current opinion in structural biology* 8.3 (1998), pp. 346–354.
- [11] Cervantes, Laura et al. “The conjugative plasmid of a bean-nodulating *Sinorhizobium fredii* strain is assembled from sequences of two *Rhizobium* plasmids and the chromosome of a *Sinorhizobium* strain”. In: *BMC microbiology* 11.1 (2011), p. 149.
- [12] Chen, Lishan et al. “A new type IV secretion system promotes conjugal transfer in *Agrobacterium tumefaciens*”. In: *Journal of bacteriology* 184.17 (2002), pp. 4838–4845.
- [13] Daubin, Vincent, Lerat, Emmanuelle, and Perrière, Guy. “The source of laterally transferred genes in bacterial genomes”. In: *Genome biology* 4.9 (2003), R57.
- [14] Doolittle, W Ford. “Lateral genomics”. In: *Trends in Biochemical Sciences* 24.12 (1999), pp. M5–M8.
- [15] Friesen, Maren L. “Widespread fitness alignment in the legume–rhizobium symbiosis”. In: *New Phytologist* 194.4 (2012), pp. 1096–1111.
- [16] Galibert, Francis et al. “The composite genome of the legume symbiont *Sinorhizobium meliloti*”. In: *Science* 293.5530 (2001), pp. 668–672.
- [17] Garud, Nandita R et al. “Recent selective sweeps in North American *Drosophila melanogaster* show signatures of soft sweeps”. In: *PLoS genetics* 11.2 (2015), e1005004.
- [18] Greenlon, Alex et al. “Global-level population genomics reveals differential effects of geography and phylogeny on horizontal gene transfer in soil bacteria”. In: *Proceedings of the National Academy of Sciences* 116.30 (2019), pp. 15200–15209.
- [19] Guillot, Gilles and Rousset, François. “Dismantling the Mantel tests”. In: *Methods in Ecology and Evolution* 4.4 (2013), pp. 336–344.
- [20] Gurevich, Alexey et al. “QUAST: quality assessment tool for genome assemblies”. In: *Bioinformatics* 29.8 (2013), pp. 1072–1075.
- [21] Hanage, William P. “Not so simple after all: bacteria, their population genetics, and recombination”. In: *Cold Spring Harbor perspectives in biology* 8.7 (2016), a018069.
- [22] Harmon, Luke J and Glor, Richard E. “Poor statistical performance of the Mantel test in phylogenetic comparative analyses”. In: *Evolution: International Journal of Organic Evolution* 64.7 (2010), pp. 2173–2178.
- [23] Harrison, Peter W et al. “Introducing the bacterial chromid: not a chromosome, not a plasmid”. In: *Trends in microbiology* 18.4 (2010), pp. 141–148.
- [24] Haukka, Kaisa, Lindström, Kristina, and Young, J Peter W. “Three phylogenetic groups of nodA and nifH genes in *Sinorhizobium* and *Mesorhizobium* isolates from leguminous trees growing in Africa and Latin America”. In: *Appl. Environ. Microbiol.* 64.2 (1998), pp. 419–426.
- [25] Heidelberg, John F et al. “DNA sequence of both chromosomes of the cholera pathogen *Vibrio cholerae*”. In: *Nature* 406.6795 (2000), p. 477.
- [26] Hirsch, PR et al. “Physical Identification of Bacteriocinogenic, Nodulation and Other Plasmids in Strains of *Rhizobium leguminosarum*”. In: *Microbiology* 120.2 (1980), pp. 403–412.
- [27] Jain, Chirag et al. “High throughput ANI analysis of 90K prokaryotic genomes reveals clear species boundaries”. In: *Nature communications* 9.1 (2018), p. 5114.
- [28] Konstantinidis, Konstantinos T, Ramette, Alban, and Tiedje, James M. “The bacterial species definition in the genomic era”. In: *Philosophical Transactions of the Royal Society B: Biological Sciences* 361.1475 (2006), pp. 1929–1940.
- [29] Konstantinidis, Konstantinos T and Tiedje, James M. “Prokaryotic taxonomy and phylogeny in the genomic era: advancements and challenges ahead”. In: *Current opinion in microbiology* 10.5 (2007), pp. 504–509.
- [30] Kumar, Nitin et al. “Bacterial genospecies that are not ecologically coherent: population genomics of *Rhizobium leguminosarum*”. In: *Open biology* 5.1 (2015), p. 140133.

- [31] Laguerre, Gisèle et al. “Classification of rhizobia based on nodC and nifH gene analysis reveals a close phylogenetic relationship among *Phaseolus vulgaris* symbionts”. In: *Microbiology* 147.4 (2001), pp. 981–993.
- [32] Lawrence, Jeffrey G and Ochman, Howard. “Reconciling the many faces of lateral gene transfer”. In: *TRENDS in Microbiology* 10.1 (2002), pp. 1–4.
- [33] Lechner, Marcus et al. “Orthology detection combining clustering and synteny for very large datasets”. In: *PLoS One* 9.8 (2014), e105015.
- [34] Lemaire, Benny et al. “Symbiotic diversity, specificity and distribution of rhizobia in native legumes of the Core Cape Subregion (South Africa)”. In: *FEMS Microbiology Ecology* 91.2 (2015), pp. 2–17.
- [35] Leplae, Raphaël et al. “Diversity of bacterial type II toxin–antitoxin systems: a comprehensive search and functional analysis of novel families”. In: *Nucleic acids research* 39.13 (2011), pp. 5513–5525.
- [36] Lerat, Emmanuelle, Daubin, Vincent, and Moran, Nancy A. “From gene trees to organismal phylogeny in prokaryotes: the case of the  $\gamma$ -Proteobacteria”. In: *PLoS biology* 1.1 (2003), e19.
- [37] Ling, Jun et al. “Plant nodulation inducers enhance horizontal gene transfer of Azorhizobium caulinodans symbiosis island”. In: *Proceedings of the National Academy of Sciences* 113.48 (2016), pp. 13875–13880.
- [38] Long, Quan et al. “Massive genomic variation and strong selection in *Arabidopsis thaliana* lines from Sweden”. In: *Nature genetics* 45.8 (2013), p. 884.
- [39] Mamidi, Sujana et al. “Genome-wide association studies identifies seven major regions responsible for iron deficiency chlorosis in soybean (*Glycine max*)”. In: *PLoS one* 9.9 (2014), e107469.
- [40] Mangin, Brigitte et al. “Novel measures of linkage disequilibrium that correct the bias due to population structure and relatedness”. In: *Heredity* 108.3 (2012), p. 285.
- [41] Masuda, Hisako and Inouye, Masayori. “Toxins of prokaryotic toxin-antitoxin systems with sequence-specific endoribonuclease activity”. In: *Toxins* 9.4 (2017), p. 140.
- [42] Merkl, Rainer. “SIGI: score-based identification of genomic islands”. In: *BMC bioinformatics* 5.1 (2004), p. 22.
- [43] Nandasena, Kemanthi G et al. “Rapid in situ evolution of nodulating strains for *Biserrula pelecinus* L. through lateral transfer of a symbiosis island from the original mesorhizobial inoculant”. In: *Appl. Environ. Microbiol.* 72.11 (2006), pp. 7365–7367.
- [44] Needleman, Saul B and Wunsch, Christian D. “A general method applicable to the search for similarities in the amino acid sequence of two proteins”. In: *Journal of molecular biology* 48.3 (1970), pp. 443–453.
- [45] Ochman, Howard, Lawrence, Jeffrey G, and Groisman, Eduardo A. “Lateral gene transfer and the nature of bacterial innovation”. In: *nature* 405.6784 (2000), p. 299.
- [46] Passel, Mark WJ van et al. “An acquisition account of genomic islands based on genome signature comparisons”. In: *BMC genomics* 6.1 (2005), p. 163.
- [47] Perez Carrascal, Olga M et al. “Population genomics of the symbiotic plasmids of sympatric nitrogen-fixing *Rhizobium* species associated with *Phaseolus vulgaris*”. In: *Environmental microbiology* 18.8 (2016), pp. 2660–2676.
- [48] Provorov, NA, Andronov, EE, and Onishchuk, OP. “Forms of natural selection controlling the genomic evolution in nodule bacteria”. In: *Russian Journal of Genetics* 53.4 (2017), pp. 411–419.
- [49] Provorov, Nikolai A and Vorobyov, Nikolai I. “Interplay of Darwinian and frequency-dependent selection in the host-associated microbial populations”. In: *Theoretical population biology* 70.3 (2006), pp. 262–272.
- [50] Provorov, Nikolai A and Vorobyov, Nikolai I. “Population genetics of rhizobia: construction and analysis of an infection and release model”. In: *Journal of theoretical biology* 205.1 (2000), pp. 105–119.
- [51] Remigi, Philippe et al. “Symbiosis within symbiosis: evolving nitrogen-fixing legume symbionts”. In: *Trends in microbiology* 24.1 (2016), pp. 63–75.
- [52] Rogel, Marco A, Ormeno-Orrillo, Ernesto, and Romero, Esperanza Martinez. “Symbiobars in rhizobia reflect bacterial adaptation to legumes”. In: *Systematic and Applied Microbiology* 34.2 (2011), pp. 96–104.
- [53] Rosini, Roberto et al. “Identification of novel genomic islands coding for antigenic pilus-like structures in *Streptococcus agalactiae*”. In: *Molecular microbiology* 61.1 (2006), pp. 126–141.
- [54] Rousset, Francois. “Partial Mantel tests: reply to Castellano and Balletto”. In: *Evolution* 56.9 (2002), pp. 1874–1875.
- [55] Sauvage, Christopher et al. “Genome-wide association in tomato reveals 44 candidate loci for fruit metabolic traits”. In: *Plant physiology* 165.3 (2014), pp. 1120–1132.
- [56] Schulein, Ralf and Dehio, Christoph. “The VirB/VirD4 type IV secretion system of *Bartonella* is essential for establishing intraerythrocytic infection”. In: *Molecular microbiology* 46.4 (2002), pp. 1053–1067.
- [57] Seemann, Torsten. “Prokka: rapid prokaryotic genome annotation”. In: *Bioinformatics* 30.14 (2014), pp. 2068–2069.
- [58] Segovia, Lorenzo, Young, J Peter W, and Martínez-Romero, Esperanza. “Reclassification of American *Rhizobium leguminosarum* biovar phaseoli type I strains as *Rhizobium etli* sp. nov.” In: *International Journal of Systematic and Evolutionary Microbiology* 43.2 (1993), pp. 374–377.
- [59] Sievers, Fabian et al. “Fast, scalable generation of high-quality protein multiple sequence alignments using Clustal Omega”. In: *Molecular systems biology* 7.1 (2011).
- [60] Silva, Claudia et al. “*Rhizobium etli* and *Rhizobium gallicum* nodulate common bean (*Phaseolus vulgaris*) in a traditionally managed milpa plot in Mexico: popula-

- tion genetics and biogeographic implications”. In: *Appl. Environ. Microbiol.* 69.2 (2003), pp. 884–893. 230
- [61] Simonsen, Martin and Pedersen, Christian NS. “Rapid computation of distance estimators from nucleotide and amino acid alignments”. In: *Proceedings of the 2011 ACM Symposium on Applied Computing*. ACM. 2011, pp. 89–93. 235
- [62] Sukumaran, Jeet and Holder, Mark T. “DendroPy: a Python library for phylogenetic computing”. In: *Bioinformatics* 26.12 (2010), pp. 1569–1571.
- [63] Sullivan, John T et al. “Comparative sequence analysis of the symbiosis island of *Mesorhizobium loti* strain R7A”. In: *Journal of Bacteriology* 184.11 (2002), pp. 3086–3095. 240
- [64] Sullivan, John T et al. “Nodulating strains of *Rhizobium loti* arise through chromosomal symbiotic gene transfer in the environment”. In: *Proceedings of the National Academy of Sciences* 92.19 (1995), pp. 8985–8989. 245
- [65] Tarjan, Robert. “Depth-first search and linear graph algorithms”. In: *SIAM journal on computing* 1.2 (1972), pp. 146–160.
- [66] Van Cauwenberghe, Jannick et al. “Population structure of root nodulating *Rhizobium leguminosarum* in *Vicia cracca* populations at local to regional geographic scales”. In: *Systematic and applied microbiology* 37.8 (2014), pp. 613–621. 250
- [67] VanRaden, Paul M. “Efficient methods to compute genomic predictions”. In: *Journal of dairy science* 91.11 (2008), pp. 4414–4423. 255
- [68] Vuong, Holly B, Thrall, Peter H, and Barrett, Luke G. “Host species and environmental variation can influence rhizobial community composition”. In: *Journal of Ecology* 105.2 (2017), pp. 540–548. 260
- [69] Wetzal, Margaret E et al. “The repABC plasmids with quorum-regulated transfer systems in members of the Rhizobiales divide into two structurally and separately evolving groups”. In: *Genome biology and evolution* 7.12 (2015), pp. 3337–3357. 265
- [70] Yoder, Jeremy B et al. “Genomic signature of adaptation to climate in *Medicago truncatula*”. In: *Genetics* 196.4 (2014), pp. 1263–1275.
- [71] Young, J Peter W et al. “The genome of *Rhizobium leguminosarum* has recognizable core and accessory components”. In: *Genome biology* 7.4 (2006), R34. 270
- [72] Zhao, Ran et al. “Adaptive evolution of rhizobial symbiotic compatibility mediated by co-evolved insertion sequences”. In: *The ISME journal* 12.1 (2018), p. 101. 275

# Supplementary figures of the paper: Symbiosis genes show a unique pattern of introgression and selection within a *Rhizobium leguminosarum* species complex

*Cavassim et al.*

## Contents

### List of Figures

|     |                                                                        |    |
|-----|------------------------------------------------------------------------|----|
| S1  | Map of soil sampling locations . . . . .                               | 2  |
| S2  | Map of soil sampling locations - Denmark . . . . .                     | 2  |
| S3  | Pacbio assembly . . . . .                                              | 3  |
| S4  | Illumina and Jigome assembly . . . . .                                 | 3  |
| S5  | Overall assembly stats . . . . .                                       | 4  |
| S6  | <i>RpoB</i> sequences and genospecies . . . . .                        | 5  |
| S7  | Core and accessory genes . . . . .                                     | 6  |
| S8  | Introgression score scheme . . . . .                                   | 7  |
| S9  | Structural rearrangements between genospecies . . . . .                | 7  |
| S10 | Introgression score distribution across pacbio assemblies . . . . .    | 8  |
| S11 | Population structure effect on LD estimates with Mantel test . . . . . | 9  |
| S12 | <i>repA</i> gene phylogeny of plasmid Rh07 . . . . .                   | 10 |
| S13 | Phylogenies of <i>tra</i> genes of plasmid Rh08 . . . . .              | 11 |
| S14 | Phylogeny of <i>fixT</i> and sym-plasmid classification . . . . .      | 12 |



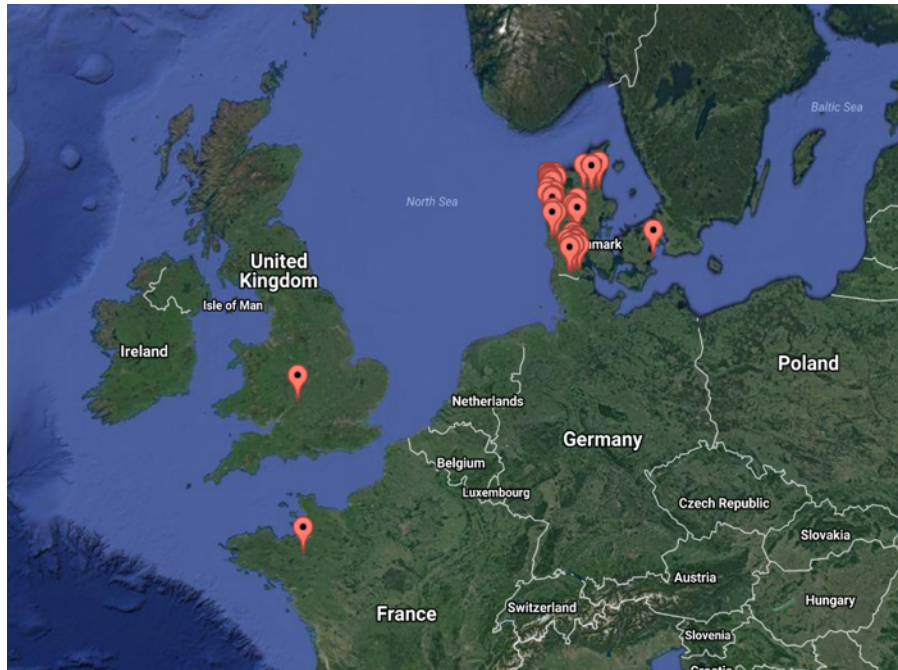

Figure S1: White clover roots were collected from three different DLF trials sites: United Kingdom (UK), Denmark (DK) and France (F).

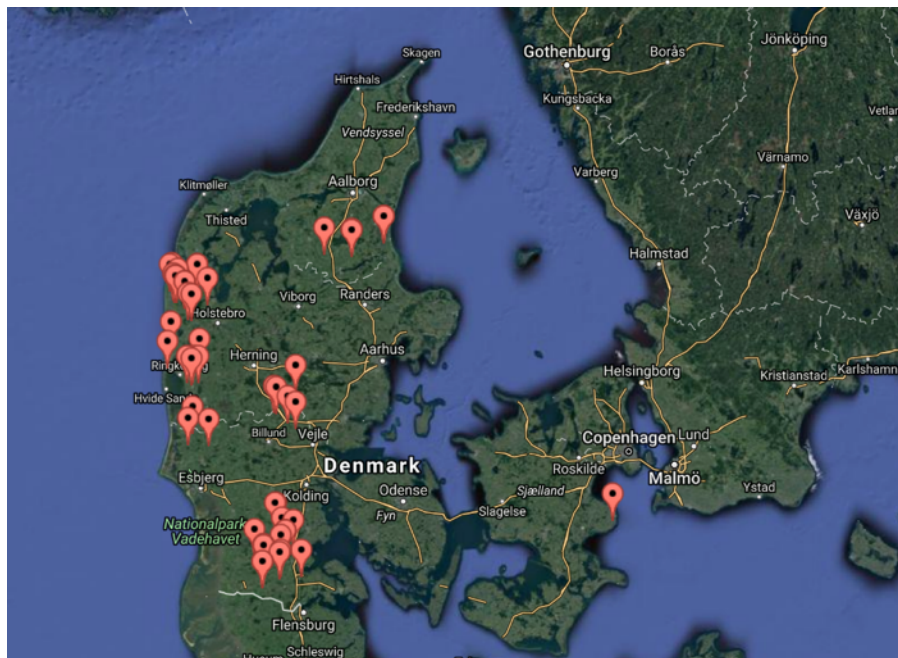

Figure S2: Soil samples were also collected from 50 Danish organic fields (DKO). Geographic information system (GIS) data is attached in supplementary table 1.

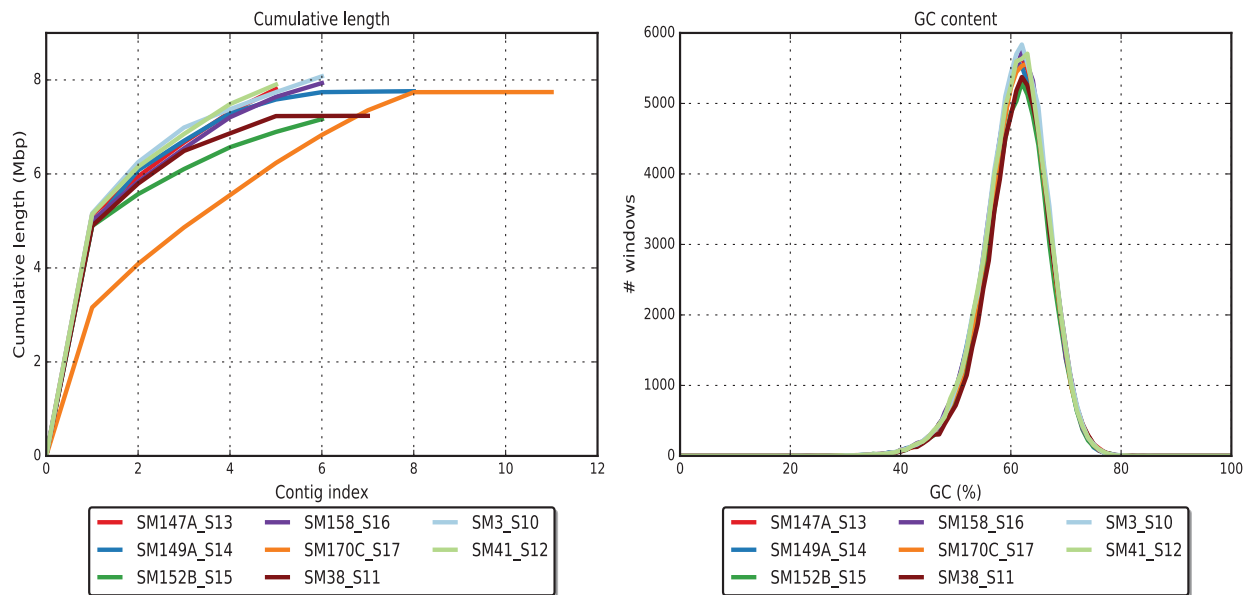

Figure S3: Number of contigs and GC content in each pacbio assembly. These strains were used in order to improve the illumina assemblies. Strain SM170C was excluded from the re-assembly analysis.

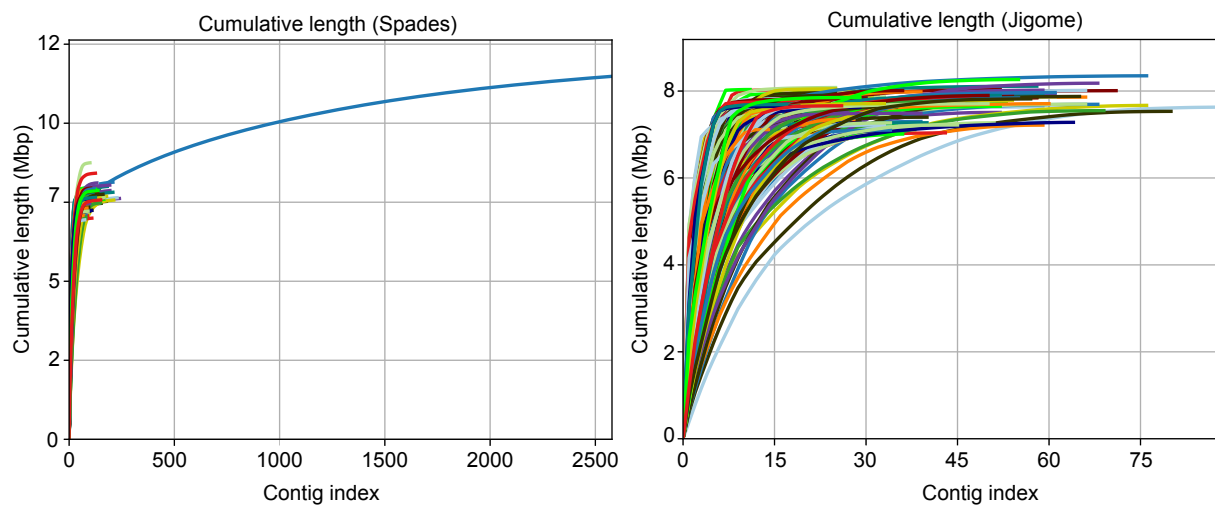

Figure S4: Number of contigs per strain using Spades and later Jigome. A fixed threshold for a minimum contig length of 200 bp was used.

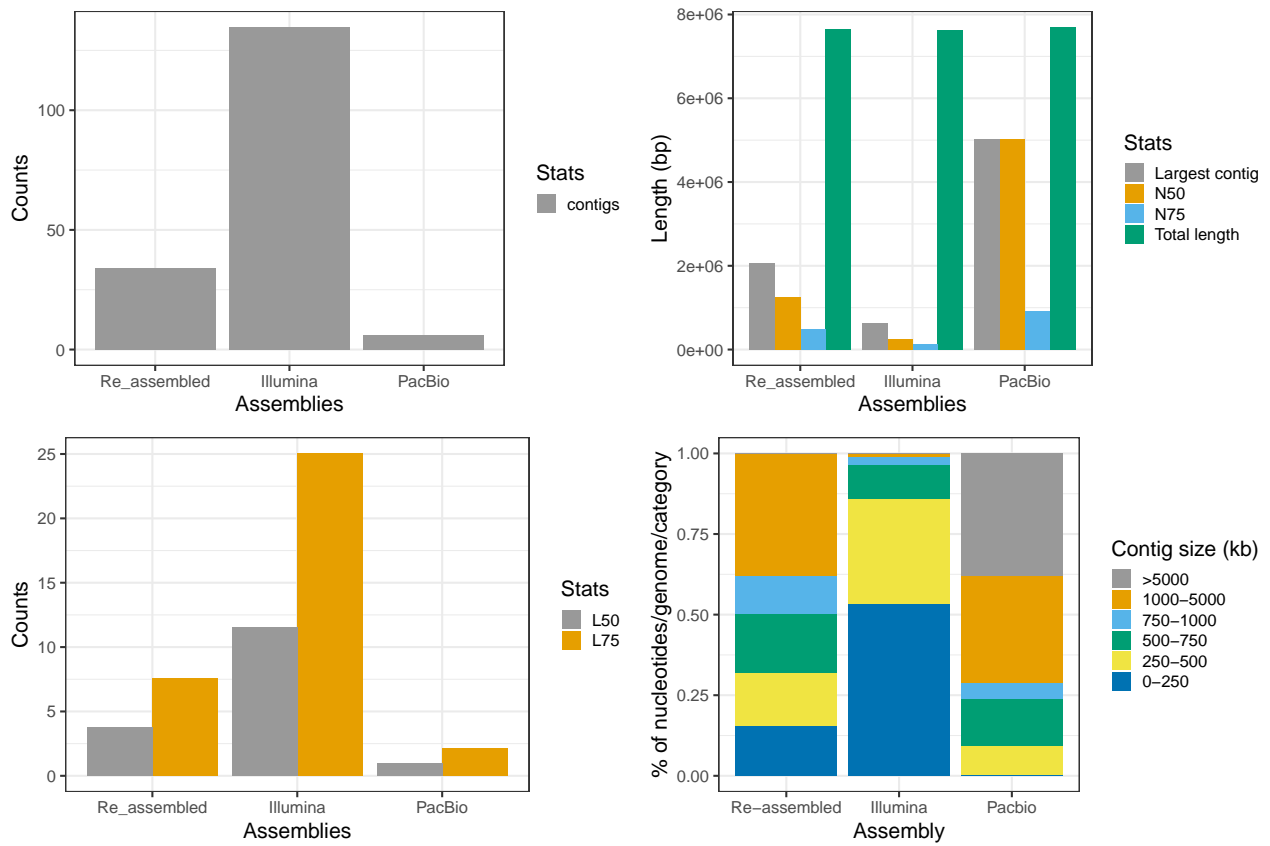

Figure S5: Different statistics across the 3 assemblies: Illumina (Spades assembly), Pacbio (HGAP.3 assembly) and Re-assembled (Illumina re-assembled with Jigome). Re-assembled and Pacbio were used in these analysis.

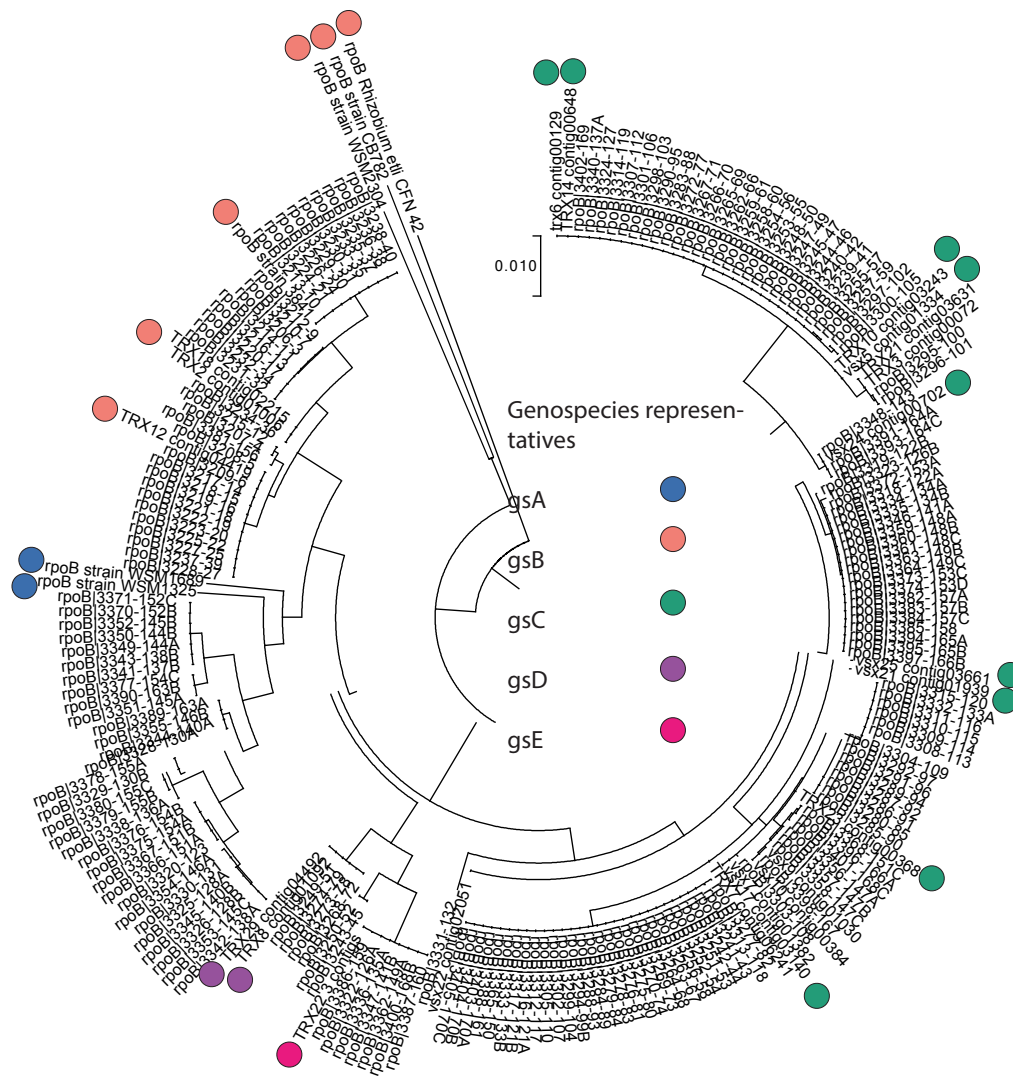

Figure S6: (a) RpoB phylogenetic tree and *rpoB* sequences of representatives of each genospecies (circles). These sequences were previously classified by Kumar et al., 2015.

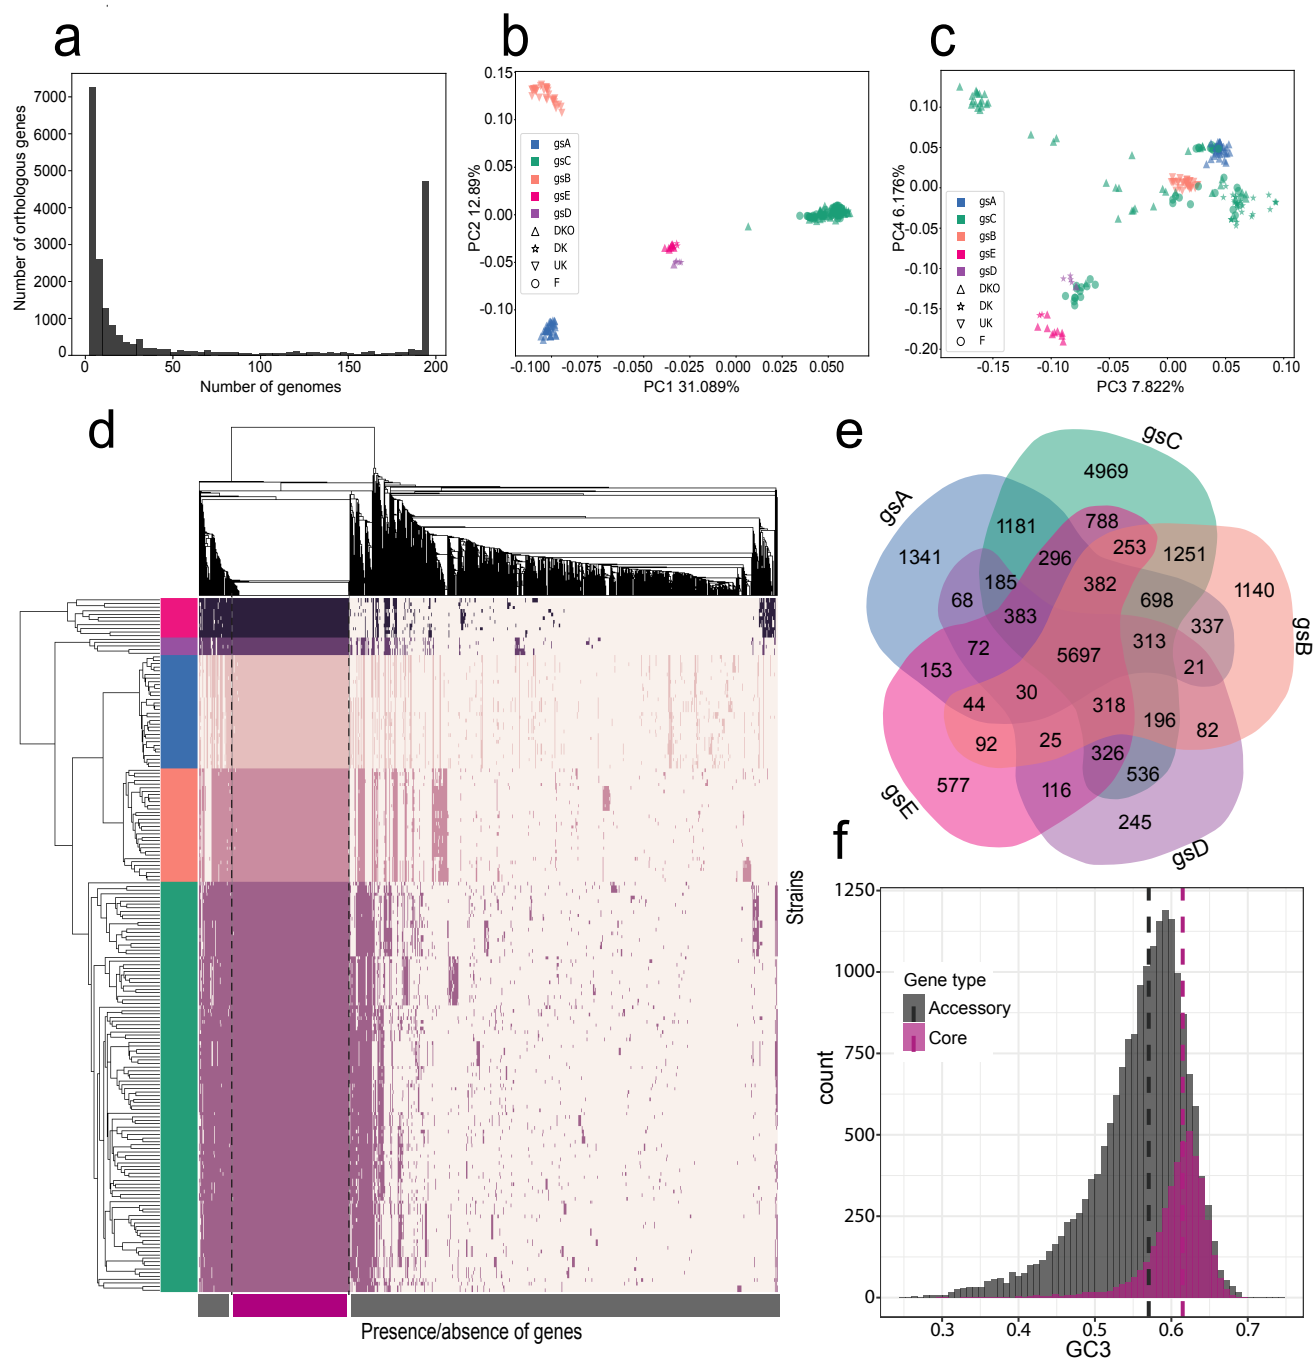

Figure S7: (a) Histogram showing the distribution of shared genes across strains, with a total of 22,115 orthologous genes. (b) Principal component analysis (PCA) of the covariance matrix based on the allelic variation of 6,529 genes that were present in at least 100 strains (see Methods). The colours correspond to the genospecies and the shapes to the origin of the sample. PC1 and PC2. (c) PC3 and PC4 of the PCA. (d) Matrix of the presence (dark) and absence (light) of all 22,115 orthologous gene groups. Strains are clustered by similarity (y-axis), and genes are clustered by their patterns of presence and absence (y-axis). (e) Venn diagram of the shared orthologous genes across the 5 genospecies; the outermost numbers represent the number of genes that are private to the genospecies. (f) GC3 content distribution across accessory and core genes; dashed lines represent the median GC3 of each category.

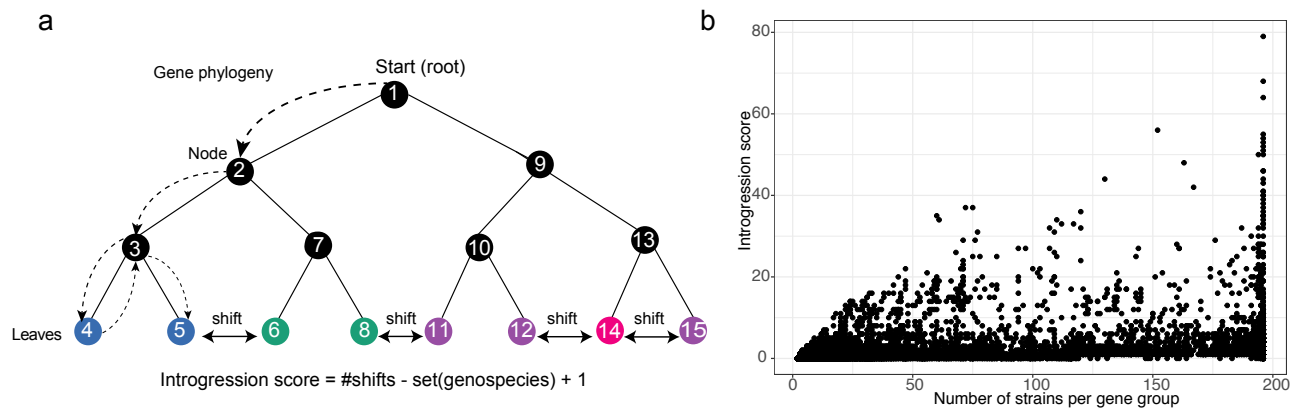

Figure S8: Illustration of the approach for detecting gene introgression (a), and its dependency on the number of members in each orthologous gene (b).

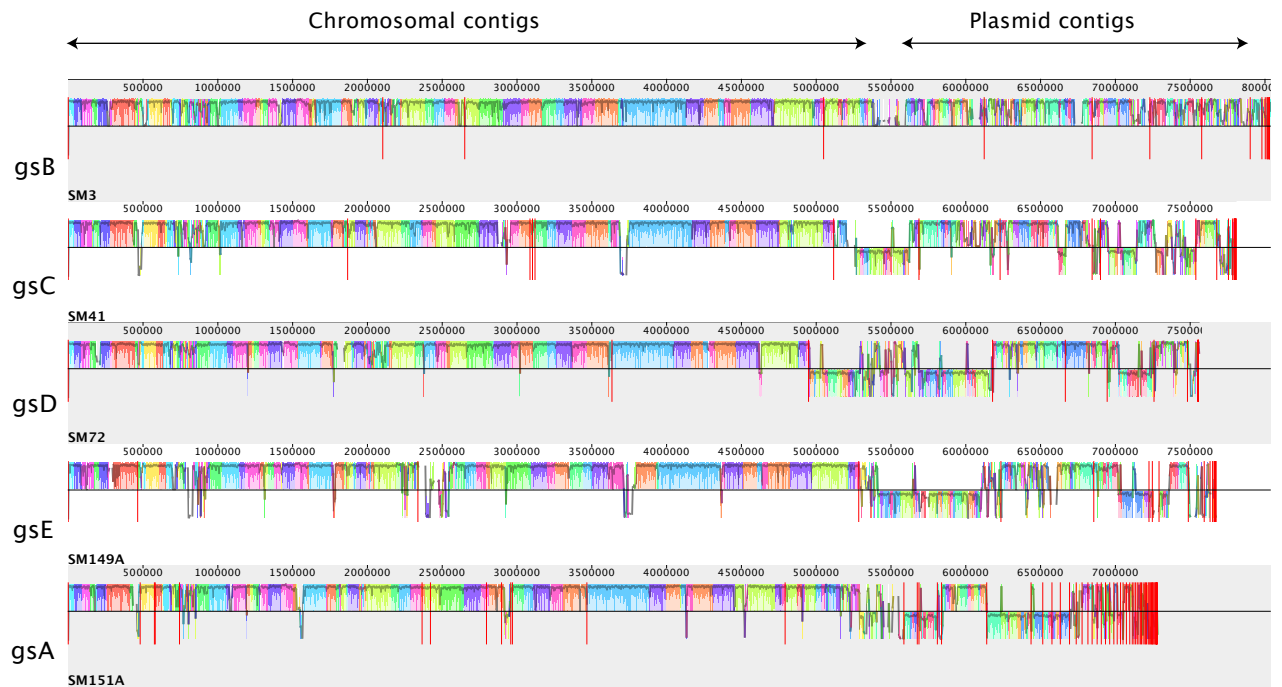

Figure S9: Structural rearrangements and gene interactions of *Rhizobium leguminosarum* bv. *trifolii*. High chromosomal collinearity and distribution of plasmid types. Multiple alignment across one strain from each genospecies, plasmids and chromosomal contigs are distinguished. The coloured blocks correspond to local collinear blocks that are detected by Mauve alignment and are internally free from genome rearrangements.

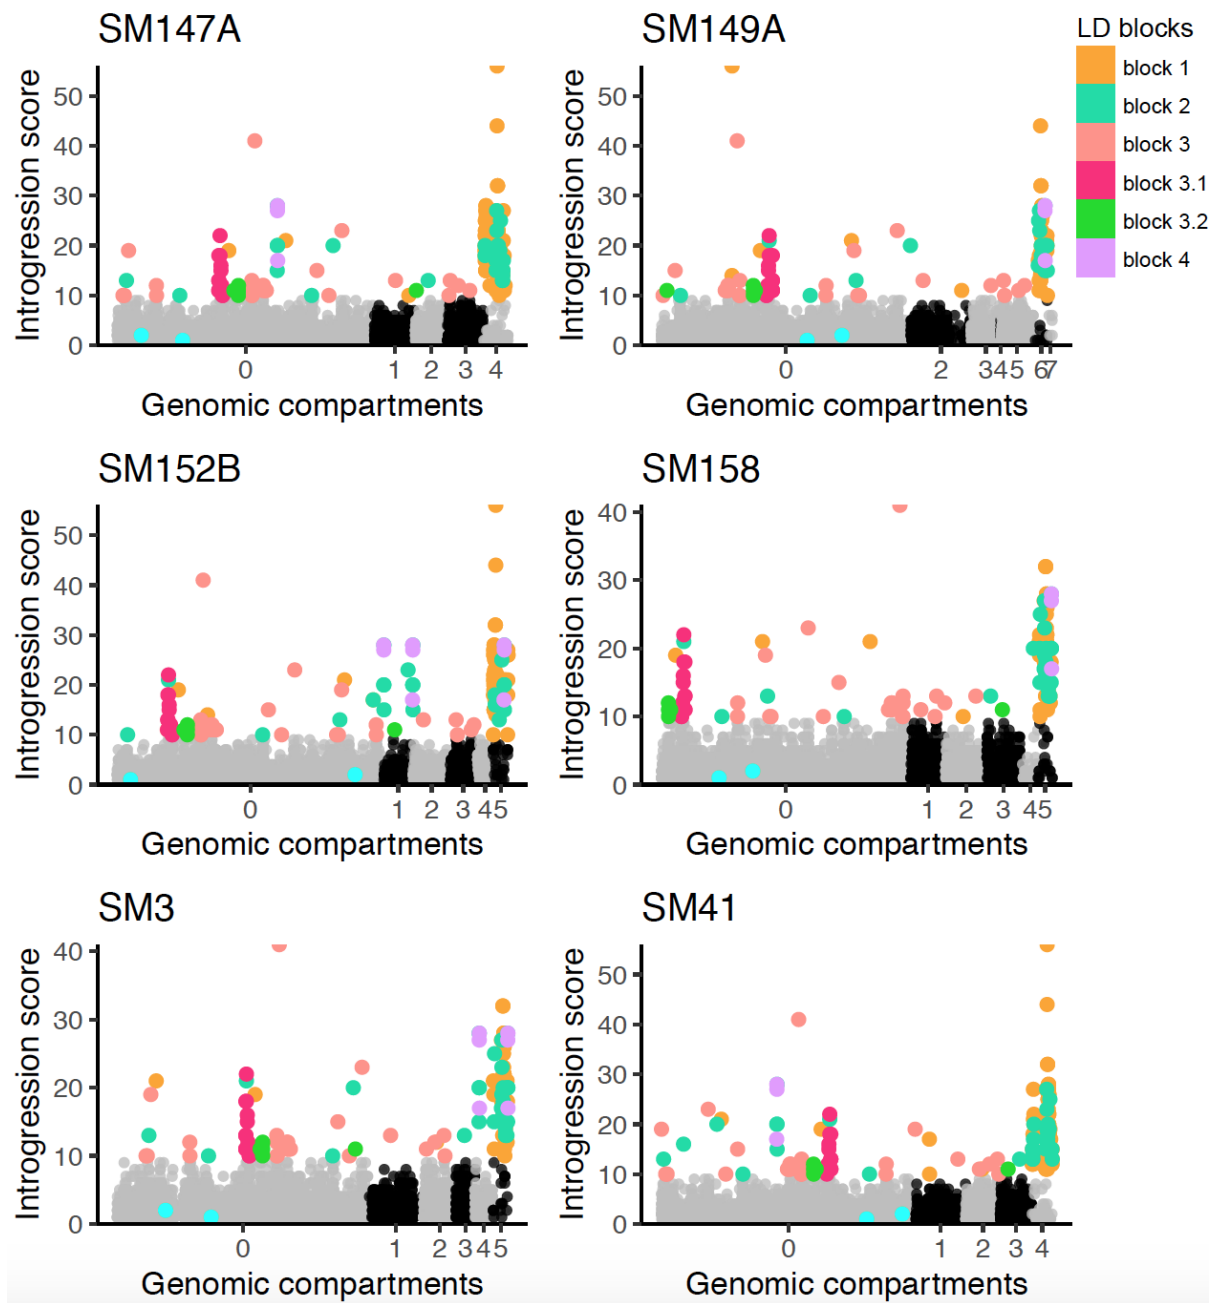

Figure S10: Orthologous gene groups were blast against pacbio assemblies and introgession score (y-axis) is plotted against genomic positions (x-axis). Grey and black dots represents the genes distributed in the different compartments (chromosome = 0, chromid = 1 and 2, >2 = plasmids). Light blue are the two conserved genes (*recA* and *rpoob*), all the other colors correspond to the linkage blocks classified by the intergenic LD analysis.

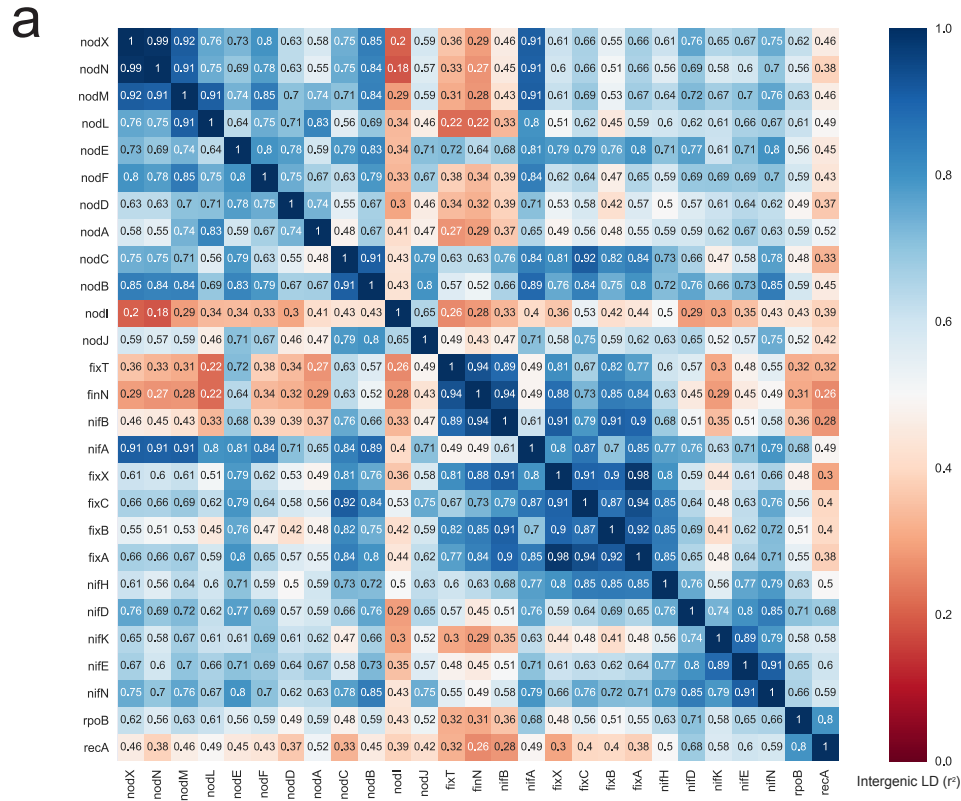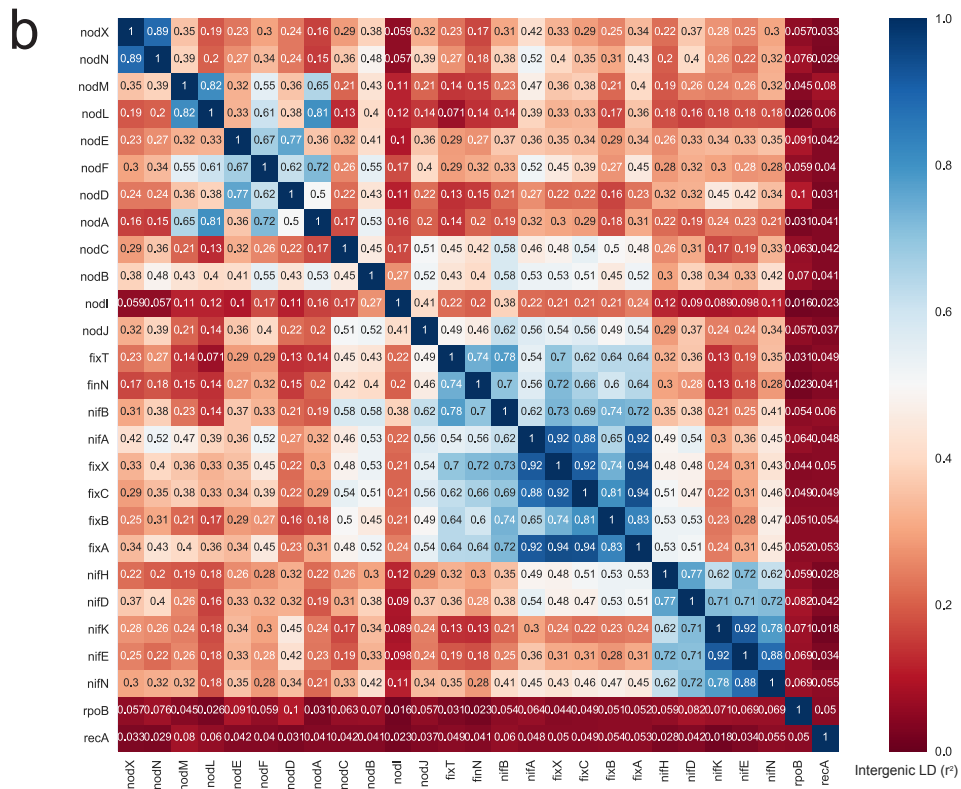

Figure S11: Intergenic linkage disequilibrium before (a) and after (b) population structure correction. The top 24 genes displayed in the matrix are plasmid-borne symbiosis genes, the two last genes (*rpoB* and *recA*), are highly conserved chromosomal genes: part of the DNA recombination and repair system; and part of beta subunit in RNA polymerase, respectively.



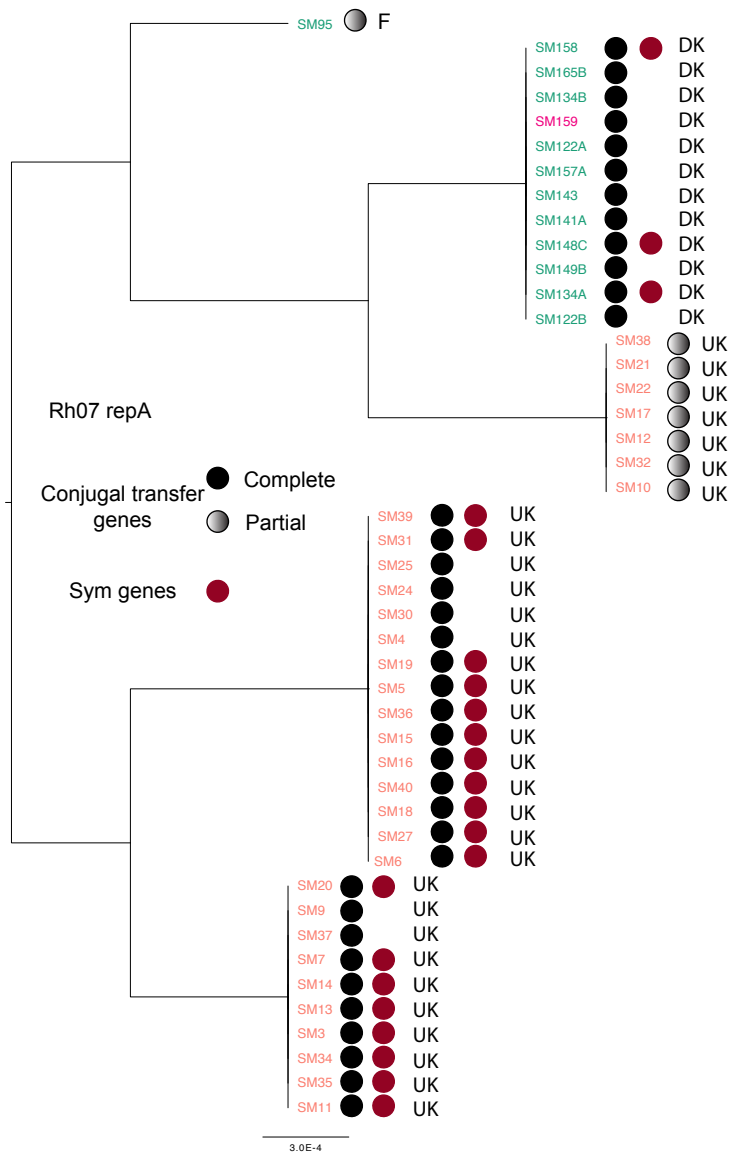

Figure S12: Phylogenetic analysis of the *repA* gene of plasmid type Rh07. DKO represents strains sampled from Danish organic fields, DK from Danish conventional trials. A complete set of conjugational transfer genes has the following genes upstream of *repA*: *traI, trbBCDEJKLFGHI, traRMHBFACDG*, with the origin of transfer (*oriT*) between *traA* and *traC*. Partial sets are broken by the end of the scaffold, mostly after *traM*.

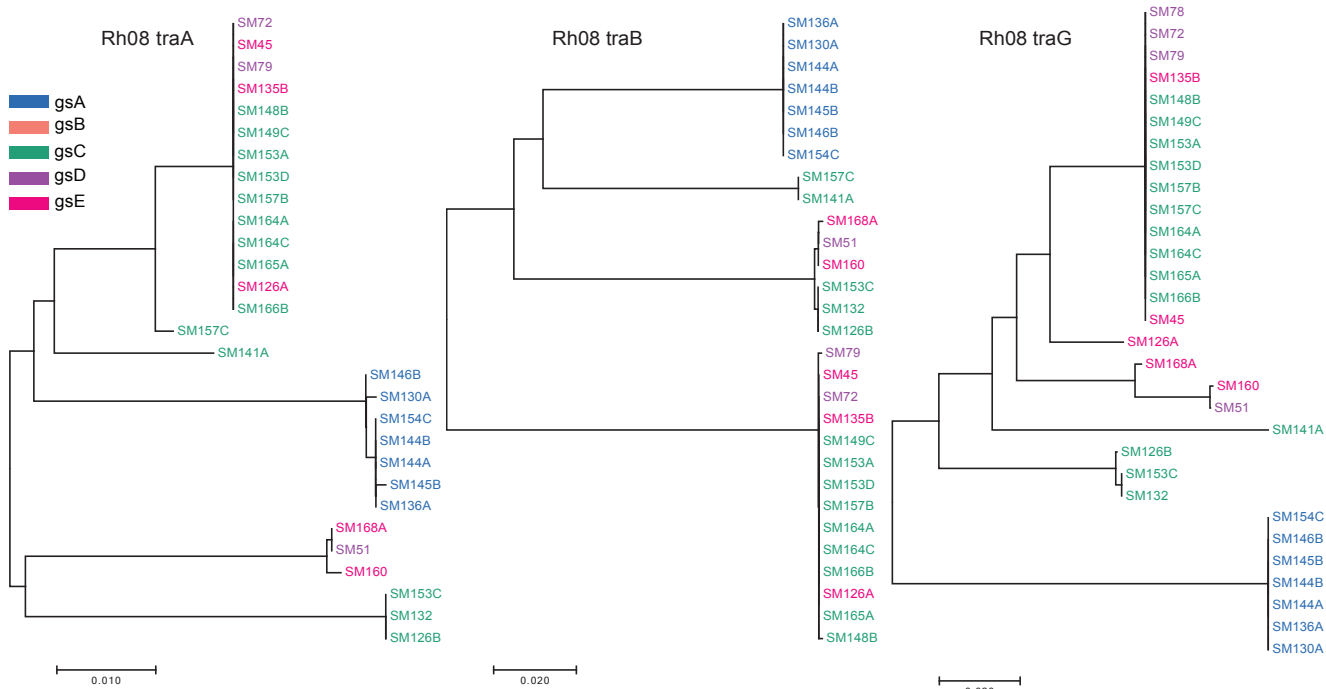

Figure S13: Phylogenetic trees of transfer genes (*tra*) essential for the conjugation process. These genes are found in strains containing the plasmid Rh08, which is the sym-plasmid for some of the strains. A complete set of conjugal transfer genes has the following genes upstream of *repA*: *traI, trbBCDEJKLFGHI, traRMHBFACDG.*)

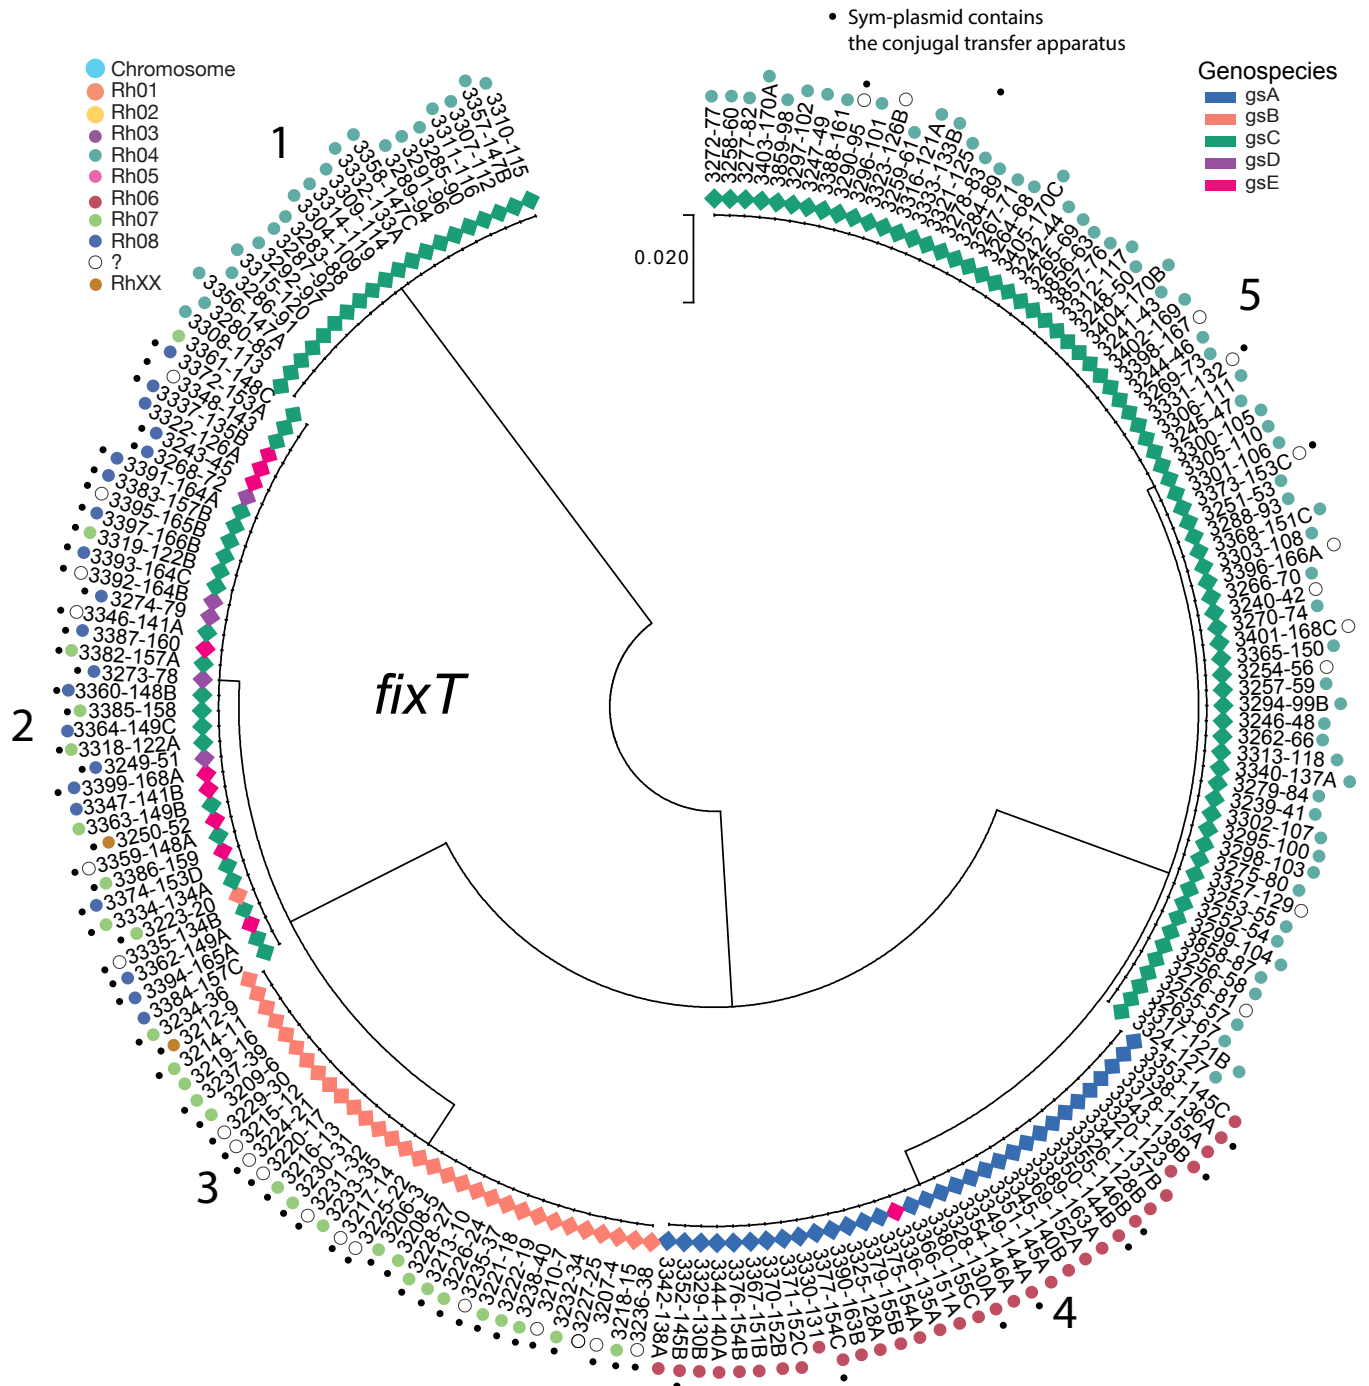

Figure S14: Phylogenetic tree of *fixT* and sym-plasmid classification. Dots correspond to strains containing a mobile sym-plasmid, with conjugal transfer system. With the exception of gsB clade (all strains from UK), no other clade is confined to a specific country of origin. All the numbers following the dash corresponds to the SM strain name.
